# Supplementary material for: Bimolecular Cross‐Metathesis of a Tetrasubstituted Alkene with Allylic Sulfones
Source: PubMed Central journal article supplement — ChemistryOpen. 2019 Feb 14;8(2):201–5. doi: 10.1002/open.201800296 (PMC6376213; doi:10.1002/open.201800296), 2019-02-14
Supplement: OPEN-8-201-s001.pdf [file OPEN-8-201-s001.pdf]

# Supporting Information

© Copyright Wiley-VCH Verlag GmbH & Co. KGaA, 69451 Weinheim, 2019

## **Bimolecular Cross-Metathesis of a Tetrasubstituted Alkene with Allylic Sulfones**

Rishi R. Sapkota, Jacqueline M. Jarvis, Tanner M. Schaub, Marat R. Talipov, and Jeffrey B. Arterburn\* ©201x The Authors. Published by Wiley-VCH Verlag GmbH & Co. KGaA. This is an open access article under the terms of the Creative Commons Attribution Non-Commercial NoDerivs License, which permits use and distribution in any medium, provided the original work is properly cited, the use is non-commercial and no modifications or adaptations are made.

Supporting Information

# SUPPORTING INFORMATION

---

## Table of Contents

|                                                                                                                        |       |
|------------------------------------------------------------------------------------------------------------------------|-------|
| Supplementary Experimental Procedures.....                                                                             | 1     |
| General Considerations .....                                                                                           | 1     |
| Synthesis of <b>(1a)</b> .....                                                                                         | 1     |
| Synthesis of <b>(1b)</b> .....                                                                                         | 1     |
| Synthesis of allylic sulfide <b>(1c)</b> .....                                                                         | 2     |
| Synthesis of allylic sulfone <b>(1d)</b> .....                                                                         | 2     |
| General procedure(I) for homodimerization of <b>1b,1c</b> and <b>1d</b> .....                                          | 8     |
| General procedure(II) for cross-metathesis reactions of <b>(1b,1c</b> and <b>1d)</b> with trisubstituted alkene .....  | 9     |
| Vinyl <b>(1b)</b> and 2-methyl-2-butene <b>(1S)</b> cross-metathesis: .....                                            | 9     |
| Sulfide <b>(1c)</b> and 2-methyl-2-butene <b>(1S)</b> cross-metathesis:.....                                           | 11    |
| Sulfone <b>(1d)</b> and 2-methyl-2-butene <b>(1S)</b> cross-metathesis:.....                                           | 12    |
| Sulfone <b>(1d)</b> and citral <b>(2S)</b> cross-metathesis: .....                                                     | 14    |
| Sulfone <b>(1d)</b> and squalene <b>(3S)</b> cross-metathesis: .....                                                   | 15    |
| General procedure(III) for cross-metathesis reactions of <b>(1c</b> and <b>1d)</b> with tetrasubstituted alkene: ..... | 16    |
| Sulfide <b>(1c)</b> and 2,3-dimethyl-2-butene <b>(4S)</b> cross-metathesis .....                                       | 16    |
| Sulfone <b>(1d)</b> and 2,3-dimethyl-2-butene <b>(4S)</b> cross-metathesis .....                                       | 17    |
| Methyl allyl sulfone (12) and 2,3-dimethyl-2-butene (4S) cross-metathesis .....                                        | 18    |
| Pnenyl allyl sulfone (15) and 2,3-dimethyl-2-butene (4S) cross-metathesis.....                                         | 18    |
| 1-(allyloxy)-4-methoxybenzene (18) and 2,3-dimethyl-2-butene (4S) cross-metathesis.....                                | 18    |
| Computational details .....                                                                                            | 19    |
| Validation of the computational model .....                                                                            | 20    |
| HG(II) –2,3-dimethyl-2-butene (4S) initiation reaction evaluation .....                                                | 22    |
| Reaction of allylsulfone carbene and 2,3-dimethyl-2-butene <b>(4S)</b> .....                                           | 31    |
| Reaction of allylsulfide carbene and 2,3-dimethyl-2-butene <b>(4S)</b> .....                                           | 40    |
| NMR Spectra of synthetic compounds.....                                                                                | 49-69 |
| <sup>1</sup> H NMR of <b>1a</b> .....                                                                                  | 49    |
| <sup>19</sup> F NMR of <b>1a</b> .....                                                                                 | 49    |
| <sup>13</sup> C NMR of <b>1a</b> .....                                                                                 | 50    |
| <sup>1</sup> H NMR of <b>1b</b> .....                                                                                  | 50    |
| <sup>19</sup> F NMR of <b>1b</b> .....                                                                                 | 51    |
| <sup>13</sup> C NMR of <b>1b</b> .....                                                                                 | 51    |
| <sup>1</sup> H NMR of <b>1c</b> .....                                                                                  | 52    |
| <sup>19</sup> F NMR of <b>1c</b> .....                                                                                 | 52    |
| <sup>13</sup> C NMR of <b>1c</b> .....                                                                                 | 53    |
| <sup>1</sup> H NMR of <b>1d</b> .....                                                                                  | 53    |
| <sup>19</sup> F NMR of <b>1d</b> .....                                                                                 | 54    |
| <sup>13</sup> C NMR of <b>1d</b> .....                                                                                 | 54    |
| <sup>1</sup> H NMR of <b>2d</b> .....                                                                                  | 55    |
| <sup>19</sup> F NMR of <b>2d</b> .....                                                                                 | 55    |
| <sup>13</sup> C NMR of <b>2d</b> .....                                                                                 | 56    |

## SUPPORTING INFORMATION

|                                                                                                                                                |       |
|------------------------------------------------------------------------------------------------------------------------------------------------|-------|
| <sup>1</sup> H NMR of <b>4b</b> .....                                                                                                          | 56    |
| <sup>19</sup> F NMR of <b>4b</b> .....                                                                                                         | 57    |
| <sup>1</sup> H NMR of <b>4c</b> .....                                                                                                          | 57    |
| <sup>19</sup> F NMR of <b>4c</b> .....                                                                                                         | 58    |
| <sup>13</sup> C NMR of <b>4c</b> .....                                                                                                         | 59    |
| <sup>1</sup> H NMR of <b>4d</b> .....                                                                                                          | 60    |
| <sup>19</sup> F NMR of <b>4d</b> .....                                                                                                         | 60-61 |
| <sup>13</sup> C NMR of <b>4d</b> .....                                                                                                         | 61    |
| <sup>1</sup> H NMR of <b>5d</b> .....                                                                                                          | 62    |
| <sup>13</sup> C NMR of <b>5d</b> .....                                                                                                         | 62    |
| <sup>19</sup> F NMR of <b>5d</b> .....                                                                                                         | 63    |
| <sup>1</sup> H NMR of <b>6d</b> .....                                                                                                          | 64    |
| <sup>19</sup> F NMR of <b>6d</b> .....                                                                                                         | 64    |
| <sup>13</sup> C NMR of <b>6d</b> .....                                                                                                         | 65    |
| <sup>1</sup> H NMR of <b>13</b> .....                                                                                                          | 66    |
| <sup>13</sup> C NMR of <b>13</b> .....                                                                                                         | 66    |
| <sup>1</sup> H NMR of <b>14</b> .....                                                                                                          | 67    |
| <sup>13</sup> C NMR of <b>14</b> .....                                                                                                         | 67    |
| <sup>1</sup> H NMR of <b>16</b> .....                                                                                                          | 68    |
| <sup>13</sup> C NMR of <b>16</b> .....                                                                                                         | 68    |
| <sup>1</sup> H NMR of <b>17</b> .....                                                                                                          | 69    |
| <sup>1</sup> H NMR of <b>18</b> .....                                                                                                          | 69    |
| <sup>1</sup> H NMR of mixture of <b>18</b> and <b>19</b> .....                                                                                 | 70    |
| <b>References</b> .....                                                                                                                        | 71    |
| <b>List of Schemes</b>                                                                                                                         |       |
| Scheme 1 Synthesis of metathesis probes .....                                                                                                  | 1     |
| Scheme 2 Homodimerization reaction of the metathesis probes .....                                                                              | 9     |
| Scheme 3 Reaction of HG(II) and 2,3-dimethyl-2-butenene (4S) .....                                                                             | 22    |
| Scheme 4 Reaction of allylsulfone carbene and 2,3-dimethyl-2-butene(4S) .....                                                                  | 31    |
| Scheme 5 Reaction of allylsulfide carbene and 2,3-dimethyl-2-butene (4S) .....                                                                 | 40    |
| <b>List of Figures</b>                                                                                                                         |       |
| Figure S1. Normalized fluorescence and absorption spectra of <b>1a</b> in 1-octanol.....                                                       | 4     |
| Figure S2. Normalized fluorescence/absorption spectra of <b>1b</b> in 1-octanol.....                                                           | 5     |
| Figure S3. Normalized absorption/fluorescence spectra of <b>1c</b> 1-octanol.....                                                              | 6     |
| Figure S4. Normalized absorption/fluorescence spectra of <b>1d</b> in 1-octanol.....                                                           | 7     |
| Figure S5 LC-UV-MS chromatogram of ( <b>1b</b> ) and 2-methyl-2-butene ( <b>1S</b> ) cross-metathesis.....                                     | 10    |
| Figure S6 Relative abundance of total peak area for ( <b>1b</b> ) and 2-methyl-2-butene ( <b>1S</b> ) cross-metathesis.....                    | 10    |
| Figure S7 LC-UV-MS chromatogram of ( <b>1c</b> ) and 2-methyl-2-butene ( <b>1S</b> ) cross-metathesis.....                                     | 11    |
| Figure S8 Relative abundance of total peak area for ( <b>1c</b> ) and 2-methyl-2-butene ( <b>1S</b> ) cross-metathesis.....                    | 12    |
| Figure S9. LC-UV-MS chromatogram of allylic sulfone ( <b>1d</b> ) and 2-methyl-2-butene ( <b>1S</b> ) cross-metathesis reaction.....           | 13    |
| Figure S10. Relative abundance of total peak area for allylic sulfone ( <b>1d</b> ) and 2-methyl-2-butene ( <b>1S</b> ) cross-metathesis ..... | 13    |
| Figure S11. Cross-metathesis of <b>2d</b> with 2-methyl-2-butene ( <b>1S</b> ).....                                                            | 14    |

## SUPPORTING INFORMATION

---

|                                                                                                                                                   |    |
|---------------------------------------------------------------------------------------------------------------------------------------------------|----|
| Figure S12. Cross-metathesis of <b>1d</b> with citral ( <b>2S</b> ).....                                                                          | 15 |
| Figure S13. Cross-metathesis of <b>1d</b> with Squalene ( <b>3S</b> ).....                                                                        | 16 |
| Figure S14. LC-UV-MS chromatogram of allylic sulfide ( <b>1c</b> ) and 2,3-dimethyl-2-butene ( <b>4S</b> ) cross-metathesis.....                  | 16 |
| Figure S15. Relative abundance of total peak area for allylic sulfide ( <b>1c</b> ) and 2,3-dimethyl-2-butene ( <b>4S</b> ) cross-metathesis..... | 17 |
| Figure S16. LC-UV-MS chromatogram of allylic sulfone ( <b>1d</b> ) and 2,3-dimethyl-2-butene ( <b>4S</b> ) cross-metathesis.....                  | 17 |
| Figure S17. Relative abundance of total peak area for allylic sulfone ( <b>1d</b> ) and 2,3-dimethyl-2-butene ( <b>4S</b> ) cross-metathesis..... | 18 |
| Figure S18. Equilibrium geometry of the HG(II) catalyst, calculated at the M06-L/def2-SV(P)+PCM(Dichloromethane) level of theory.....             | 20 |

### List of tables

|                                                                                                                                    |    |
|------------------------------------------------------------------------------------------------------------------------------------|----|
| Table S1 Photophysical properties of the compounds.....                                                                            | 3  |
| Table S2. RP-LC gradients for separation of metathesis probes reaction products.....                                               | 8  |
| Table S3. Comparison of the structural parameters of HG(II) pre-catalyst, obtained by X-ray crystallography and DFT calculations.. | 20 |

# SUPPORTING INFORMATION

## Experimental Procedures

### General Considerations

Unless otherwise noted, all operations were performed in a fume hood using oven-dried (135 °C) glassware with distilled and degassed solvents under an atmosphere of purified dry nitrogen gas. Deuterated NMR solvents were purchased from Cambridge Isotope Laboratories. <sup>1</sup>H, <sup>13</sup>C, and <sup>19</sup>F NMR spectra were recorded on a 300 MHz Oxford NMR spectrometer. <sup>1</sup>H NMR chemical shifts are reported in ppm from tetramethylsilane referenced to added internal standard tetramethylsilane ( $\delta = 0.00$  ppm) or with the solvent resonance resulting from incomplete deuterium incorporation as the internal standard (CDCl<sub>3</sub>:  $\delta = 7.27$  ppm, DMSO-d<sub>6</sub>:  $\delta = 2.50$  ppm). Data are reported as follows: chemical shift, multiplicity (s = singlet, d = doublet, t = triplet, q = quartet, br = broad, m = multiplet), coupling constants (Hz), and integration. <sup>13</sup>C NMR chemical shifts are reported referenced in ppm from tetramethylsilane with the solvent resonance as the internal standard (CDCl<sub>3</sub>:  $\delta = 77$  ppm, DMSO-d<sub>6</sub>:  $\delta = 39.5$ ). <sup>19</sup>F NMR chemical shifts are reported with respect to added internal standard C<sub>6</sub>F<sub>6</sub> ( $\delta = -164.9$  ppm). Preparative column chromatography was carried out using pre-packed silica cartridges (4g) in a Combiflash chromatograph. High performance liquid chromatography was conducted using an Agilent 1100 LC system (Agilent Technologies, Santa Clara, CA) equipped with a diode array detector (DAD). High resolution mass spectrometry was performed on a hybrid linear ion trap 7 Tesla Fourier transform ion cyclotron resonance (FT-ICR) mass spectrometer (Thermo Fisher, San Jose, CA), or an Orbitrap Fusion Mass Spectrometer (Thermo Fisher, San Jose, CA) at the New Mexico State University Chemical Analysis and Instrumentation Laboratory.

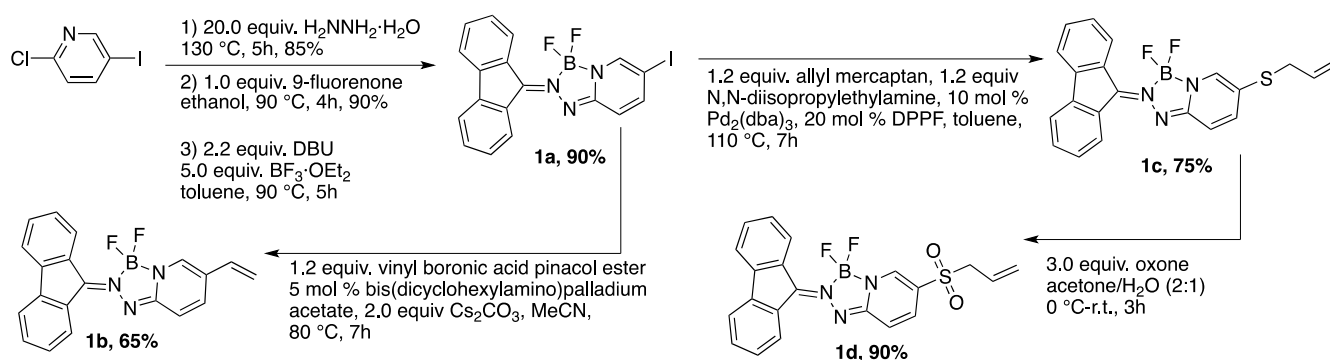

Scheme 1: Synthesis of the metathesis probes

### Synthesis of 2-(9H-fluoren-9-ylidene)-3,3-difluoro-6-iodo-2,3-dihydro-[1,2,4,3]triazaborolo[4,5-a]pyridin-2-ium-3-uide (1a)

2-Hydrazinyl-5-iodopyridine<sup>[1]</sup> (1.17g, 5 mmol) was combined with 9-fluorenone (0.9 g, 5 mmol) in ethanol and refluxed for 4h to yield the hydrazine as yellow colored solid (1.78g, 4.56 mmol, 90%). The hydrazone ((Z)-2-((9H-fluoren-9-ylidene) hydrazono)-5-iodo-1,2-dihydropyridine) was used directly without further purification. To a mixture of hydrazone: (Z)-2-((9H-fluoren-9-ylidene) hydrazono)-5-iodo-1,2-dihydropyridine (0.397 g, 1 mmol) and BF<sub>3</sub>·Et<sub>2</sub>O (0.705 g, 5 mmol) in dry toluene (5 mL) was added DBU (0.33 g, 2.2 mmol) and heated at about 90 °C for 8h. Volatiles were removed *in vacuo*. The residue was dissolved in dichloromethane (25 mL), washed with water, the organic layer was separated, dried over Na<sub>2</sub>SO<sub>4</sub> and concentrated under reduced pressure. The residue was purified by silica gel column chromatography using hexanes/EtOAc (70:30) eluent to isolate the product **1a** (0.426 g, 96 %) as a red solid. R<sub>f</sub> = 0.39 (20:80, EtOAc: Hexane); <sup>1</sup>H NMR (300 MHz, CDCl<sub>3</sub>):  $\delta$  8.98 (d, J = 7.78 Hz, 1H), 8.37 (d, J = 7.78 Hz, 1H), 7.79 (s, 1H), 7.60 (dd, J = 9.24, 1.91 Hz, 1H), 7.61-7.56 (m, 2H), 7.44 (dt, J = 7.48, 7.48, 1.17 Hz, 1H), 7.38 (dt, J = 7.48, 7.48, 1.03 Hz, 1H), 7.32 (dt, J = 7.63, 7.63, 1.32 Hz, 1H), 7.28 (dt, J = 5.72, 5.72, 1.17 Hz, 1H), 6.73 (d, J = 9.39 Hz, 1H); <sup>13</sup>C NMR (75 MHz, CDCl<sub>3</sub>) 159.2, 156.3, 150.7, 148.4, 141.84, 141.71, 141.09, 132.6, 132.1, 131.6, 131.1, 128.6, 128.5, 126.6 (t, J = 8.98 Hz, 1C), 120.1, 119.7, 115.2, 70.2; <sup>19</sup>F NMR (300 MHz, CDCl<sub>3</sub>):  $\delta$  -149.09 (q, J = 28 Hz, 2F). FT-IR (solid): 3058.6, 2923.68, 1630.59, 1608.41, 1520.63, 1471.48, 1443.52, 1407.84, 1358.66, 1299.84, 1153.27, 1100.24, 1074.20, 1034.67, 1016.35; UV-Vis (octanol)  $\lambda_{\text{max}}$ : 537 nm,  $\epsilon = 40,100$  M<sup>-1</sup>cm<sup>-1</sup>;  $\lambda_{\text{em}}$ : 572nm;  $\Phi_f = 0.80$ . Log P<sub>ow</sub> = 0.79. HRMS (m/z): calcd for [M+H]<sup>+</sup> C<sub>18</sub>H<sub>12</sub>BF<sub>2</sub>IN<sub>3</sub>: 446.0167; found: 446.0162.

### Synthesis of 2-(9H-fluoren-9-ylidene)-3,3-difluoro-6-vinyl-2,3-dihydro-[1,2,4,3]triazaborolo[4,5-a]pyridin-2-ium-3-uide (1b)

To bis(dicyclohexylamino)palladium acetate (7 mg, 0.04 mmol), 0.5 mL of dioxane was added, followed by vinyl pinacolboronate (135  $\mu$ L, 0.8 mmol), **1a** (178mg, 0.4 mmol) and cesium carbonate (260mg, 0.8 mmol)<sup>[2]</sup>. The reaction mixture was heated at 80 °C for 7h. The reaction mixture was diluted with 20 mL of diethyl ether and washed with 20 mL of 20% HCl and 20 mL of water, the organic layer was separated, dried over Na<sub>2</sub>SO<sub>4</sub>, and concentrated *in vacuo*. The residue was purified by flash chromatography eluting with EtOAc/hexane (5:95) to obtain the product **1b** as a red solid (106 mg, 75%). R<sub>f</sub> = 0.48 (10:90, EtOAc: hexane); <sup>1</sup>H NMR (300 MHz,

## SUPPORTING INFORMATION

CDCl<sub>3</sub>):  $\delta$  8.98 (d, J = 7.80 Hz, 1H), 8.40 (d, J = 7.81 Hz, 1H), 7.68 (dd, J = 9.18, 1.95 Hz, 1H), 7.59-7.54 (m, 4H), 7.43-7.25 (m, 4H), 6.9(d, J = 9.18Hz, 1H), 6.50(dd, J = 17.57, 10.93 Hz, 1H), 5.56 (d, J = 17.57 Hz, 1H), 5.2 (d, J = 11.13 Hz, 1H); <sup>13</sup>C NMR (75 MHz, CDCl<sub>3</sub>) 160.3, 149.8, 141.8, 141.7, 138.3, 134.9, 134.2, 132.5, 132.0, 131.7, 131.5, 128.7, 128.6, 126.6 (t, J = 9.21 Hz, 1C), 124.5, 122.2, 120.2, 119.9, 113.8, 112.9; <sup>19</sup>F NMR (282 MHz, CDCl<sub>3</sub>);  $\delta$  -149.89 (q, J = 31.21 Hz, 2F). FT-IR (solid); 2921.75, 1718.34, 1640.23, 1624.80, 1608.41, 1536.09, 1484.02, 1399.16, 1157.13, 1117.59, 1099.27, 1080.95; UV-Vis (octanol)  $\lambda_{\max}$ : 537 nm,  $\epsilon$  = 33,500 M<sup>-1</sup>cm<sup>-1</sup>;  $\lambda_{\text{em}}$ : 601nm;  $\Phi_f$  = 0.18. Log P<sub>o/w</sub> = 0.70. HRMS/(m/z): calcd for [M+H]<sup>+</sup> C<sub>20</sub>H<sub>14</sub>BF<sub>2</sub>N<sub>3</sub>: 346.13271; found: 346.13223.

### Synthesis of 6-(allylthio)-2-(9H-fluoren-9-ylidene)-3,3-difluoro-2,3-dihydro-[1,2,4,3]triazaborolo[4,5-a]pyridin-2-ium-3-uide (1c)

Following the literature procedure the C-S coupling was carried out as follows.<sup>[3]</sup>The iodide 1a (178 mg, 0.4 mmol), Pd<sub>2</sub>(dba)<sub>3</sub> (36 mg, 10 mol%), DPPF (44 mg, 20 mol%), allyl mercaptan (96  $\mu$ L, 1.2 mmol) and N,N-diisopropyl amine (76  $\mu$ L, 0.44 mmol) were combined in a sealed tube under an atmosphere of nitrogen. The reaction mixture was heated at 110 °C in toluene (0.1 M) for 7h. The reaction was cooled to room temperature and diluted with 20 mL of ether, washed with 20 mL of water and 20 mL of 1 M HCl solution. The organic layer was separated, dried over Na<sub>2</sub>SO<sub>4</sub>, and concentrated *in vacuo*. The residue was purified by column chromatography eluting with EtOAc/hexane (1:99) to obtain the product 1c as a red solid (106 mg, 72%). R<sub>f</sub> = 0.48 (30:70, EtOAc/hexane); <sup>1</sup>H NMR (300 MHz, CDCl<sub>3</sub>):  $\delta$  8.97 (d, J = 7.78 Hz, 1H), 8.39 (d, J = 7.78 Hz, 1H), 7.68 (s, 1H), 7.58-7.24 (m, 7H), 6.82 (d, J = 9.39 Hz, 1H), 5.82 (dd, J = 17.02, 9.98 Hz, 1H), 5.08 (d, J = 10.56 Hz, 1H), 4.96 (d, J = 17.02 Hz, 1H); <sup>13</sup>C NMR (75 MHz, CDCl<sub>3</sub>) 159.9, 150.2, 147.2, 141.7, 141.6, 140.5, 133.2, 132.4, 132.2, 132.0, 131.5, 131.1, 128.6, 128.4, 126.5 (t, J = 9.21 Hz, 1C), 120.0, 119.7, 118.5, 116.2, 113.4, 40.0; <sup>19</sup>F NMR (282 MHz, CDCl<sub>3</sub>);  $\delta$  -149.45 (q, J = 30.34 Hz, 2F). FT-IR (solid); 3068.32, 2918.86, 1761.41, 1608.41, 1628.66, 1531.27, 1443.52, 1452.20, 1466.66, 1399.16, 1303.70; UV-Vis (octanol)  $\lambda_{\max}$ : 531 nm,  $\epsilon$  = 34,200 M<sup>-1</sup>cm<sup>-1</sup>;  $\lambda_{\text{em}}$ : 618nm;  $\Phi_f$  = 0.06. Log P<sub>o/w</sub> = 1.43. HRMS/(m/z): calcd for [M+H]<sup>+</sup> C<sub>21</sub>H<sub>17</sub>BF<sub>2</sub>N<sub>3</sub>S: 392.12043; found: 392.11995.

### Synthesis of 6-(allylsulfonyl)-2-(9H-fluoren-9-ylidene)-3,3-difluoro-2,3-dihydro-[1,2,4,3]triazaborolo[4,5-a]pyridin-2-ium-3-uide (1d)

Oxone (230 mg, 0.75 mmol) in water (1.5 mL) was added to a cooled (0 °C) solution of the allylic sulfide 1c (98 mg, 0.25 mmol) in acetone (3.0 mL). The reaction mixture was stirred at room temperature for 3h.<sup>[4]</sup> The reaction mixture was diluted with dichloromethane (15 mL), washed with water, the organic layer was separated, dried over Na<sub>2</sub>SO<sub>4</sub>, and concentrated under reduced pressure. The residue was purified by column chromatography eluting with dichloromethane to isolate the product 1d as a red solid (75 mg, 0.177 mmol, 71%). R<sub>f</sub> = 0.18 (30:70, EtOAc/hexane); <sup>1</sup>H NMR (300 MHz, CDCl<sub>3</sub>):  $\delta$  8.88 (d, J = 7.61 Hz, 1H), 8.34 (d, J = 8.36 Hz, 1H), 8.09 (bs, 1H), 7.63-7.27 (m, 7H), 6.82 (dd, J = 9.39, 3.37 Hz, 1H), 5.96-5.81 (m, 1H), 5.47 (dd, J = 10.12, 2.93 Hz, 1H), 5.30-5.29 (m, 1H), 3.84 (dd J = 7.68, 2.64 Hz, 2H); <sup>13</sup>C NMR (75 MHz, CDCl<sub>3</sub>) 159.9, 154.0, 142.4, 142.4, 140.3, 137.8, 133.7, 132.9, 132.8, 131.9, 130.5, 128.8, 128.7, 127.3 (t, J = 9.21 Hz, 1C), 125.4, 124.4, 120.7, 120.2, 119.9, 113.3, 61.0; <sup>19</sup>F NMR (282 MHz, CDCl<sub>3</sub>);  $\delta$  -148.45 (q, J = 28.61 Hz, 2F). FT-IR (solid); 3078.93, 2926.57, 1636.37, 1609.37, 1528.38, 1500.41, 1422.30, 1454.13, 1161.95, 1139.77, 1016.35; UV-Vis (octanol)  $\lambda_{\max}$ : 507 nm,  $\epsilon$  = 24,615 M<sup>-1</sup>cm<sup>-1</sup>;  $\lambda_{\text{em}}$ : 531 nm;  $\Phi_f$  = 0.13. Log P<sub>o/w</sub> = 2.00. HRMS/(m/z): calcd for [M+H]<sup>+</sup> C<sub>21</sub>H<sub>17</sub>BF<sub>2</sub>N<sub>3</sub>O<sub>2</sub>S: 424.11026; found: 424.10981.

# SUPPORTING INFORMATION

Table S1 Photophysical properties of the compounds

| SN                                                                                        | $\lambda_{max}$ | $\lambda_{emis}$ | Stoke's shift | Absorptivity $\epsilon$ | Quantum Yield | Brightness |
|-------------------------------------------------------------------------------------------|-----------------|------------------|---------------|-------------------------|---------------|------------|
| 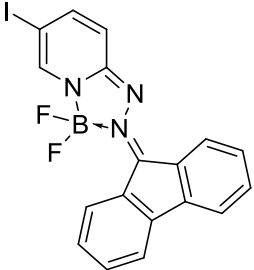<br>1a   | 537             | <b>560</b>       | 23            | 38,250                  | 0.87          | 33,277     |
| <br>1b   | 537             | <b>601</b>       | 64            | 33,500                  | 0.18          | 6,030      |
| <br>1c  | 531             | <b>618</b>       | 87            | 34,200                  | 0.06          | 2,200      |
| <br>1d | 507             | <b>531</b>       | 24            | 24,600                  | 0.13          | 3,200      |



## SUPPORTING INFORMATION

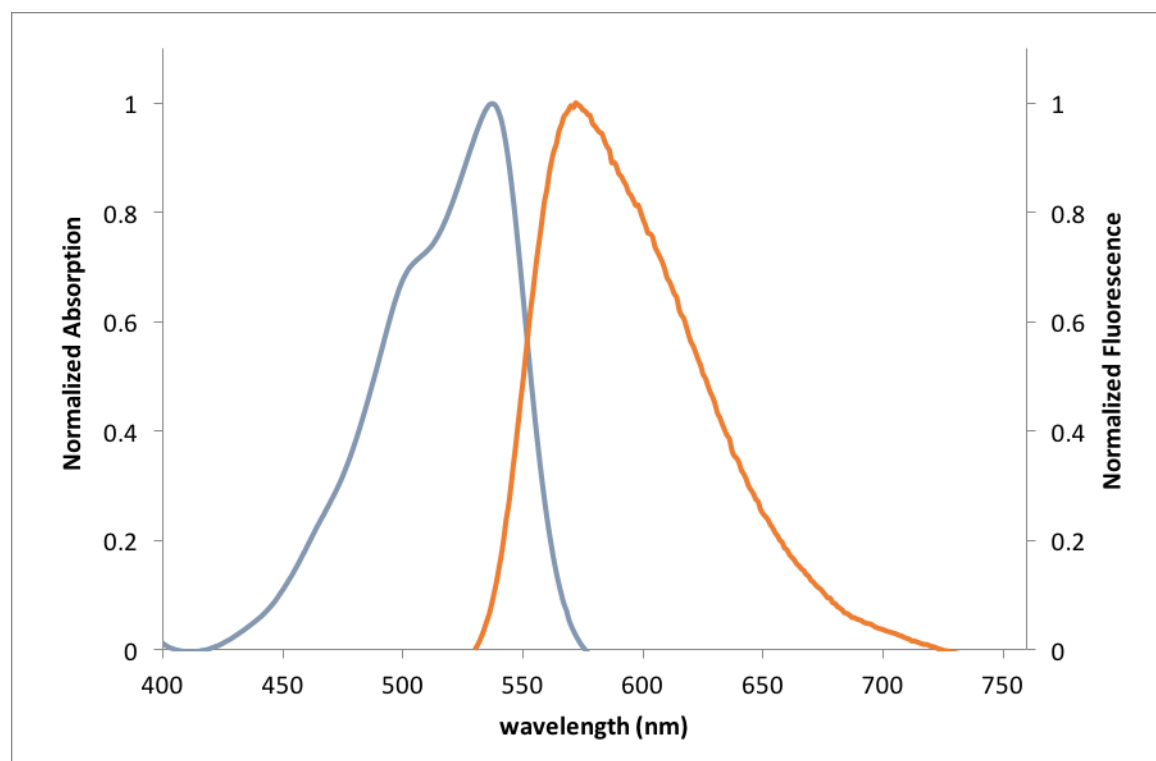

Figure S1. Normalized fluorescence and absorption spectra of **1a** in 1-octanol solution. **1a** has a Stoke's shift of 35 nm and a  $\Phi_f = 0.80$  when excited at 520 nm. A calculated  $\epsilon = 40,100 \text{ M}^{-1}\text{cm}^{-1}$ , with a  $\lambda_{\text{max}} = 537 \text{ nm}$ ,  $\lambda_{\text{em}} = 570 \text{ nm}$  with brightness = 32,100.

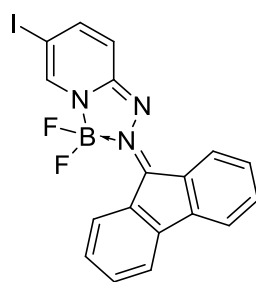

**1a**

## SUPPORTING INFORMATION

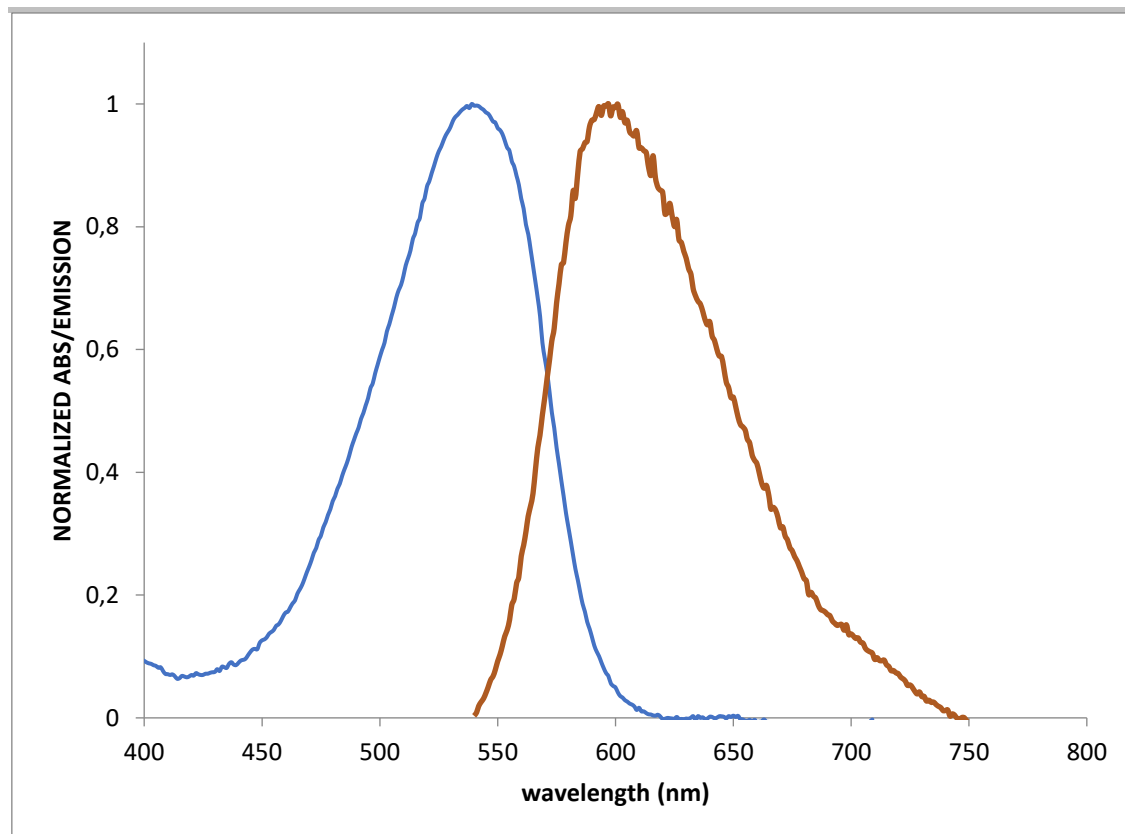

Figure S2. Normalized fluorescence/absorption spectra of **1b** in 1-octanol reveal a Stokes shift of 58nm,  $\lambda_{\text{max}} = 539\text{nm}$  and  $\lambda_{\text{em}} = 601\text{nm}$ .  $F_r = 0.18$  when excited at 530nm.

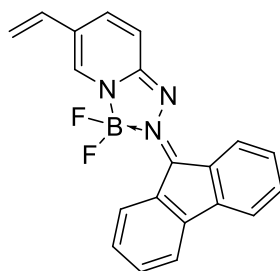

**1b**

## SUPPORTING INFORMATION

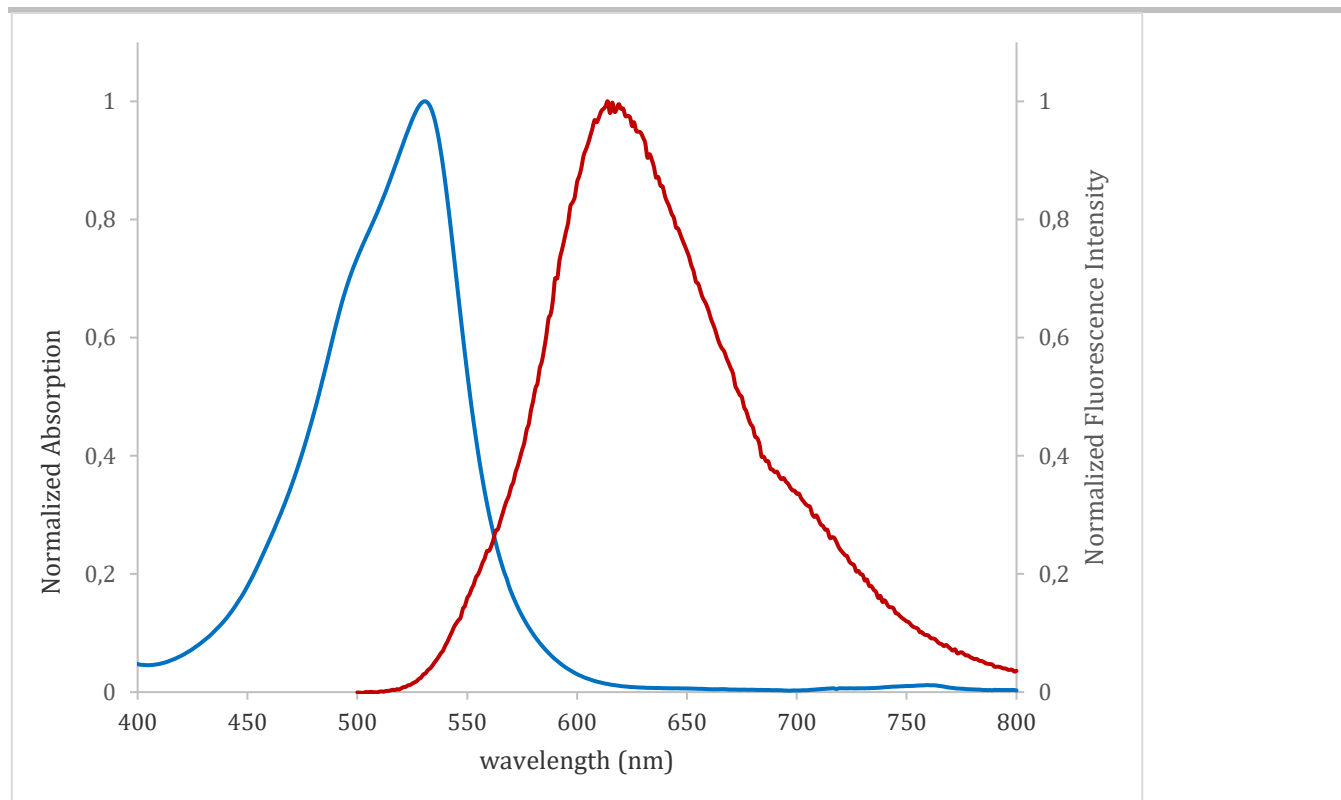

Figure S3. Normalized absorption/fluorescence spectra of 1c 1-octanol. Stoke's shift is 86nm with  $\Phi_f$  of 0.06, when excited at 520nm. A calculated  $\epsilon = 34,200\text{M}^{-1}\text{cm}^{-1}$ , with a  $\lambda_{\text{max}} = 531\text{nm}$  and  $\lambda_{\text{em}} = 617\text{nm}$ .

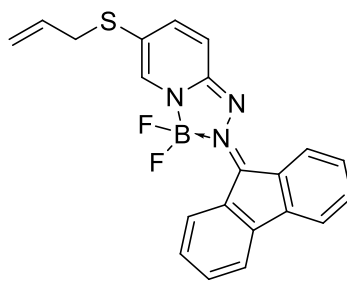

**1c**

## SUPPORTING INFORMATION

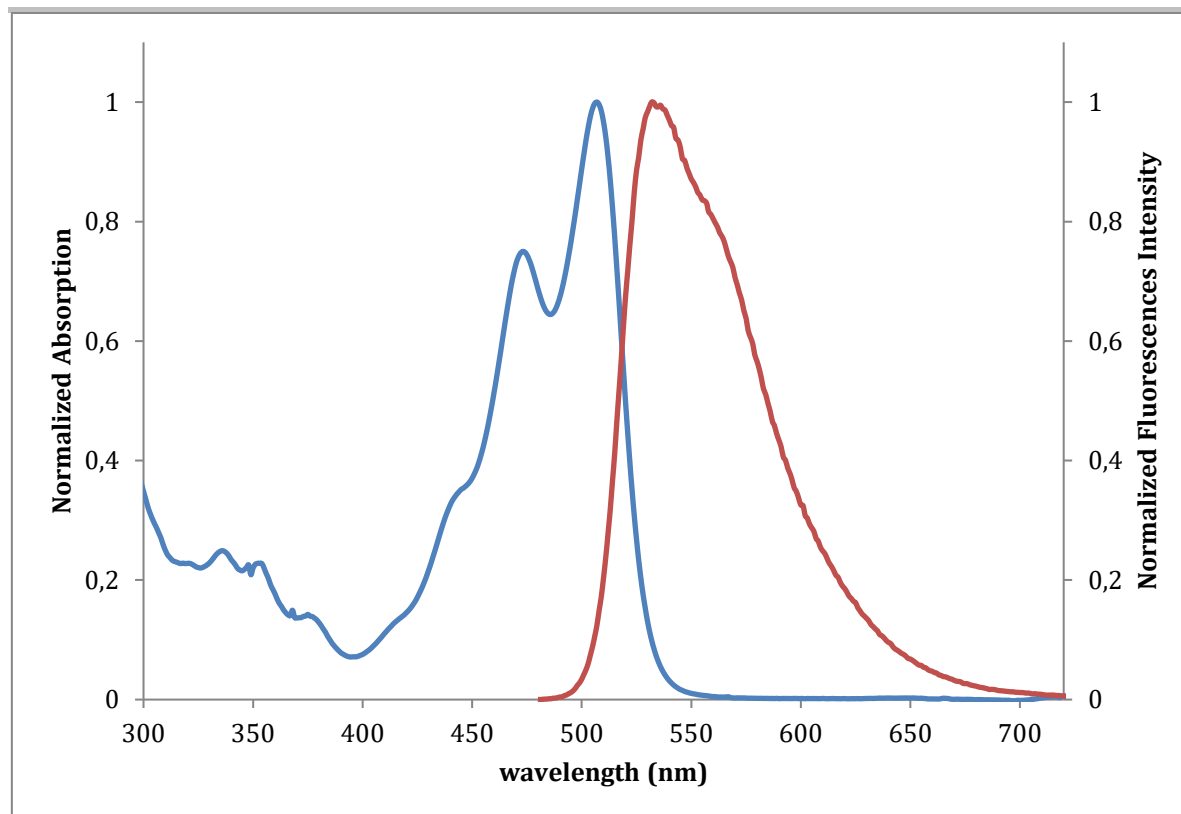

Figure S4. Normalized absorption/fluorescence spectra of **1d** in 1-octanol. The Stoke's shift is 24 nm with  $\Phi_f = 0.13$ , when excited at 490 nm. A calculated  $\epsilon = 24,600 \text{ M}^{-1}\text{cm}^{-1}$ , with a  $\lambda_{\text{max}} = 507 \text{ nm}$  and  $\lambda_{\text{em}} = 531 \text{ nm}$ .

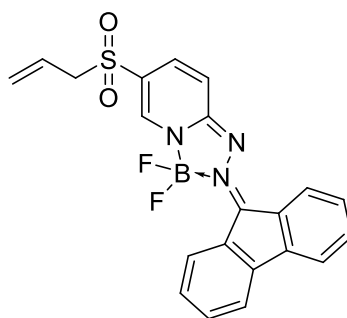

**1d**

## SUPPORTING INFORMATION

Table S2. RP-LC gradients for separation of metathesis probes reaction products.

|                                        | Time | A<br>H <sub>2</sub> O<br>0.1% formic acid | B<br>CH <sub>3</sub> CN<br>0.1% formic acid |
|----------------------------------------|------|-------------------------------------------|---------------------------------------------|
| Citral                                 | 0    | 50                                        | 50                                          |
|                                        | 5    | 30                                        | 70                                          |
|                                        | 25   | 25                                        | 75                                          |
|                                        | 30   | 1                                         | 99                                          |
| Geranyl Acetone                        | 0    | 50                                        | 50                                          |
|                                        | 5    | 20                                        | 80                                          |
|                                        | 25   | 1                                         | 99                                          |
|                                        | 35   | 1                                         | 99                                          |
| Q10                                    | 0    | 50                                        | 50                                          |
|                                        | 5    | 20                                        | 80                                          |
|                                        | 15   | 10                                        | 90                                          |
|                                        | 50   | 1                                         | 99                                          |
|                                        | 200  | 1                                         | 99                                          |
| RS-VII-133<br>RS-VII-144<br>RS-VII-145 | 0    | 50                                        | 50                                          |
|                                        | 10   | 30                                        | 70                                          |
|                                        | 55   | 10                                        | 90                                          |
|                                        | 55.1 | 1                                         | 99                                          |
|                                        | 60   | 1                                         | 99                                          |
| RS-VII-118                             | 0    | 50                                        | 50                                          |
|                                        | 5    | 20                                        | 80                                          |
|                                        | 30   | 10                                        | 90                                          |
| RS-VII-58                              | 0    | 50                                        | 50                                          |
|                                        | 5    | 20                                        | 80                                          |
|                                        | 35   | 10                                        | 90                                          |
|                                        | 40   | 1                                         | 99                                          |

## SUPPORTING INFORMATION

### General procedure (I) for homodimerization of **1b**, **1c** and **1d**:

The metathesis probe (0.05 mmol), HG(II) catalyst (1.5 mg, 0.0025 mmol) and dichloromethane (1 mL, 0.5M) were combined in a flask under an atmosphere of nitrogen and heated to reflux for the specified time. The reaction progress was monitored by TLC. The product distributions were analyzed by HPLC-MS and NMR.

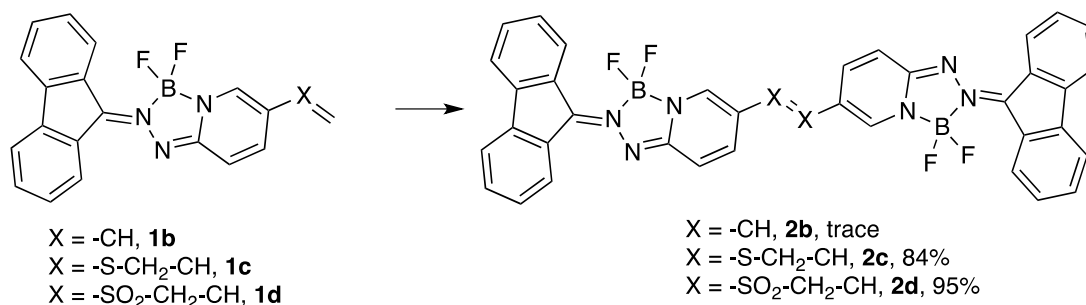

Scheme 2: Homodimerization reaction of the metathesis probe

### Homodimerization of **1b**:

Following the general procedure (I), homodimerization of the vinyl probe (**1b**) was attempted but only trace amounts of the homodimer **2b**, were observed. Extending the reaction time to 12 h resulted in decomposition of **1b** that produced uncharacterized oligomeric products.

### Homodimerization of **1c**:

Following the general procedure (I), allylic sulfide probe (**1c**) was heated for 2h, resulting in a dark solution and fine precipitate. The solids were filtered to afford the homodimer **2c** (17 mg, **0.022 mmol**, 90%). Due to very poor solubility of **1c** we were unable to obtain a high resolution <sup>13</sup>C NMR spectrum. <sup>1</sup>H NMR (300 MHz, CDCl<sub>3</sub>) δ 3.35 (d, *J* = 1.17 Hz, 4 H), 5.42 (d, *J* = 6.46 Hz, 2 H), 6.88 (s, 1 H), 6.83 (s, 1 H), 7.31 - 7.53 (m, 7 H), 7.53 - 7.67 (m, 5 H), 8.41 (s, 1 H), 8.37 (s, 1 H), 8.98 (d, *J* = 8.22 Hz, 2 H); HRMS/(*m/z*): calcd for [M+H]<sup>+</sup> C<sub>40</sub>H<sub>29</sub>N<sub>6</sub>S<sub>2</sub>B<sub>2</sub>F<sub>4</sub>: 755.2017; found: 755.2009

### Homodimerization of **1d**:

Following the general procedure (I), **1d** was heated for 2h, resulting in a dark solution with orange precipitate. The solids were filtered to afford the homodimer **2d** (18 mg, **0.022 mmol**, 91%). Due to very poor solubility of **1d** we were unable to obtain a high resolution <sup>13</sup>C NMR spectrum. <sup>1</sup>H NMR (300 MHz, DMSO-*d*<sub>6</sub>) δ 8.88 (d, *J* = 7.7 Hz, 2H), 8.31 - 8.18 (m, 3H), 7.85 (dd, *J* = 10.6, 8.5 Hz, 5H), 7.53 (q, *J* = 7.8 Hz, 4H), 7.35 (td, *J* = 8.0, 3.5 Hz, 4H), 7.14 (d, *J* = 9.5 Hz, 2H), 5.88 - 5.76 (m, 2H), 4.45 - 4.27 (m, 4H); <sup>13</sup>C NMR (50 MHz, DMSO-*d*<sub>6</sub>) δ 160.03, 152.59, 141.79, 141.66, 139.78, 139.34, 134.20, 133.22, 132.33, 131.01, 129.76, 129.15, 128.74, 126.82, 126.36, 122.55, 121.32, 120.91, 113.54, 57.86; <sup>19</sup>F NMR (282 MHz, DMSO-*d*<sub>6</sub>) δ -147.18, -147.37. HRMS/(*m/z*): calcd for [M+Na]<sup>+</sup> C<sub>40</sub>H<sub>28</sub>N<sub>6</sub>O<sub>4</sub>S<sub>2</sub>B<sub>2</sub>F<sub>4</sub>N : 841.16257; found: 841.16334.

### General procedure (II) for cross metathesis reactions of **1b**, **1c**, **1d** with 2-methyl-2-butene (**1S**):

The compound (**1b**, **1c**, **1d**: 0.05 mmol), HG(II) catalyst (1.5 mg, 0.0025 mmol) was combined with 2-methyl-2-butene (**1S**, 5 mmol, 100 equivalents) in dichloromethane and heated at 40 °C. The product distributions were analyzed at 30 minutes and 8h, respectively. An aliquot (50 μL) of the reaction mixture was passed through a short column of silica gel (800 mg) eluted with dichloromethane and the colored fractions were collected and analyzed as a mixture by LC-MS. The respective quantification histogram and the LC chromatogram are shown for each product mixture. The trisubstituted products (**4b**) were isolated and characterized by HPLC-MS, NMR spectroscopy and mass spectrometry.

### Vinyl probe (**1b**) and 2-methyl-2-butene (**1S**) cross metathesis:

Following the general procedure II, after 8h reaction time compound **4b** was isolated by column chromatography eluting with EtOAc/hexane (1:99) to yield a red colored solid (15 mg, 0.04mmol, 40%). *R*<sub>f</sub> = 0.25 (5:95, EtOAc/hexane); <sup>1</sup>H NMR (300 MHz, CDCl<sub>3</sub>): δ 9.05 (d, *J* = 7.63 Hz, 1H), 8.43 (d, *J* = 7.63 Hz, 1H), 7.69-7.60 (m, 2H), 7.52-7.29 (m, 6H), 6.92 (d, *J* = 9.10 Hz, 1H), 6.01(s, 1H), 1.92 (d, *J* = 1.17 Hz, 3H), 1.88(d, *J* = 1.17 Hz, 3H); <sup>13</sup>C NMR (50 MHz, CDCl<sub>3</sub>) δ 19.5, 26.76, 112.84, 119.58, 119.78, 119.95,

## SUPPORTING INFORMATION

126.16, 128.25, 128.47, 129.08, 130.83, 131.53, 131.91, 133.03, 133.77, 134.57, 137.19, 141.23, 143.03, 159.20;  $^{19}\text{F}$  NMR (282 MHz,  $\text{CDCl}_3$ );  $\delta$  -149.89 (q,  $J$  = 31.21 Hz, 2F). HRMS/( $m/z$ ): calcd for  $[\text{M}+\text{H}]^+$   $\text{C}_{22}\text{H}_{18}\text{BF}_2\text{N}_3$ : 374.16401; found: 374.16340. Based on the LC-MS UV detection, at 30 min **3b** was formed as major product (66%) and **4b** as minor (27%). The products at 8 h are **3b** 52% and **4b** 40% respectively and traces of homodimer **2b** were detected.

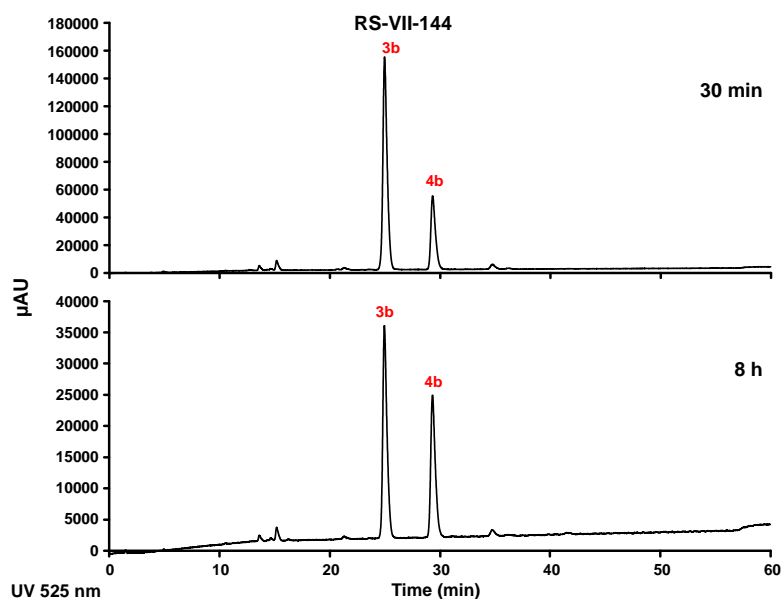

Figure S5 HPLC-UV-MS chromatogram of (**1b**) and 2-methyl-2-butene (**1S**) cross reaction products after 30 min and 8h reaction times. UV detection at 525 nm was used for relative quantitation of reaction products and HRMS detection was used to identify the reaction products.

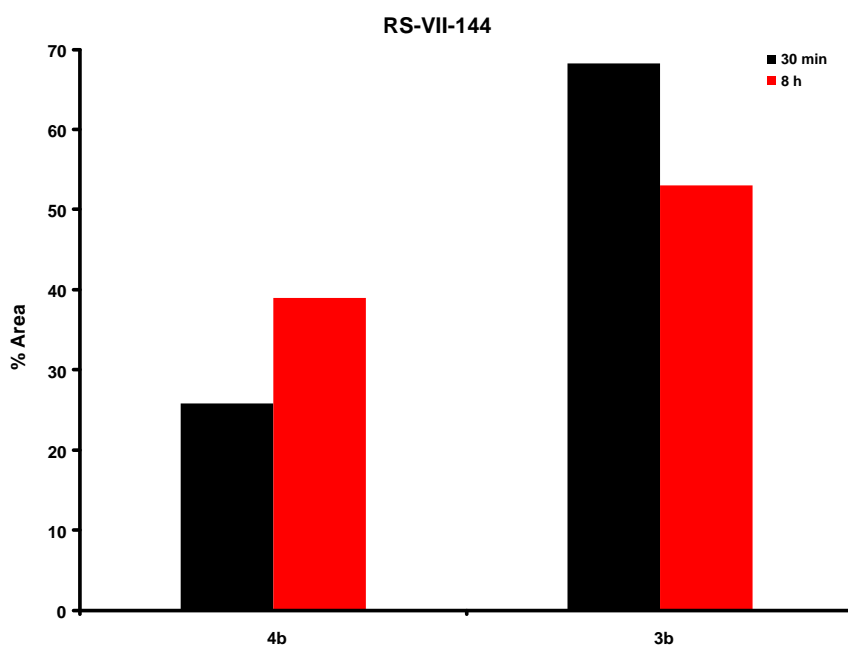

Figure S6 Relative abundance of total peak area for (**1b**) and 2-methyl-2-butene (**1S**) cross- metathesis reaction products after 30 min and 8h reaction times. UV detection at 525 nm was used for relative quantitation of reaction products and HRMS detection was used to identify the reaction products.

## SUPPORTING INFORMATION

### Sulfide probe (**1c**) and 2-methyl-2-butene(**1S**) cross-metathesis:

Following the general procedure **II**, after 8h reaction time compound **4c** was isolated by column chromatography eluting with EtOAc/hexane (10:90) to yield a dark red solid (25 mg, 0.059 mmol, 61%).  $R_f = 0.59$  (30:70, EtOAc/ hexane);  $^1\text{H NMR}$  (300 MHz,  $\text{CDCl}_3$ ):  $\delta$  9.03 (d,  $J = 6.75$  Hz, 1H), 8.41 (d,  $J = 7.78$  Hz, 1H), 8.0 (s, 1H), 7.69-7.28 (m, 8H), 6.85 (d,  $J = 8.80$  Hz, 1H), 5.25 (tt,  $J = 7.48, 1.32$  Hz, 1H), 3.35 (d,  $J = 7.34$  Hz, 2H), 1.75 (s, 3H), 1.42 (s, 3H);  $^{13}\text{C NMR}$  (75 MHz,  $\text{CDCl}_3$ ) 159.8, 150.0, 147.6, 141.7, 141.5, 140.9, 137.3, 134.6, 131.4, 131.9, 131.4, 128.5, 128.4, 126.4 (t,  $J = 9.02$  Hz, 1C), 124.3, 120.0, 119.7, 119.0, 116.5, 113.1, 34.7, 25.5, 17.4;  $^{19}\text{F NMR}$  (282 MHz,  $\text{CDCl}_3$ ):  $\delta$  -149.45 (q,  $J = 30.34$  Hz, 2F). HRMS/( $m/z$ ): calcd for  $[\text{M}+\text{H}]^+ \text{C}_{23}\text{H}_{21}\text{BF}_2\text{N}_3\text{S}$ : 420.15173; found: 420.15155. Based on the HPLC-MS UV detection, at 30 minutes **3c** was formed as a minor product (24%) and **4c** as major product (57%). The product ratio at 8h was found **3c** (17%) and **4c** (61 %) respectively. Trace amounts of the homodimerization product **2c** were observed at 8h (7%).

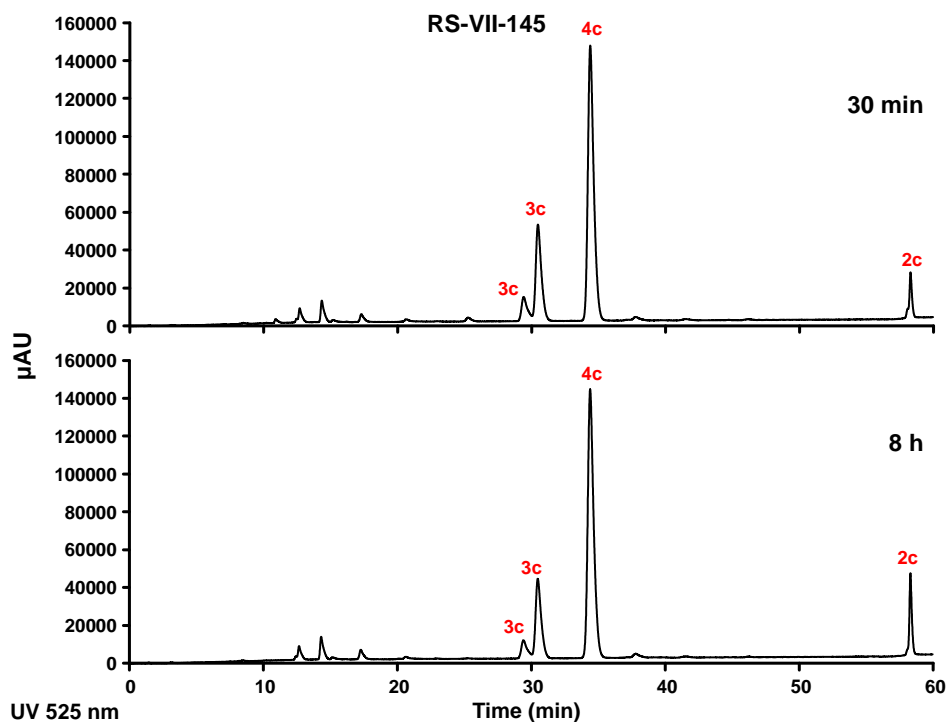

Figure S7 HPLC-UV-MS chromatogram of (**1c**) and 2-methyl-2-butene (**1S**) cross-metathesis reaction products after 30 min and 8h reaction times. UV detection at 525 nm was used for relative quantitation of reaction products and HRMS detection was used to identify the reaction products.



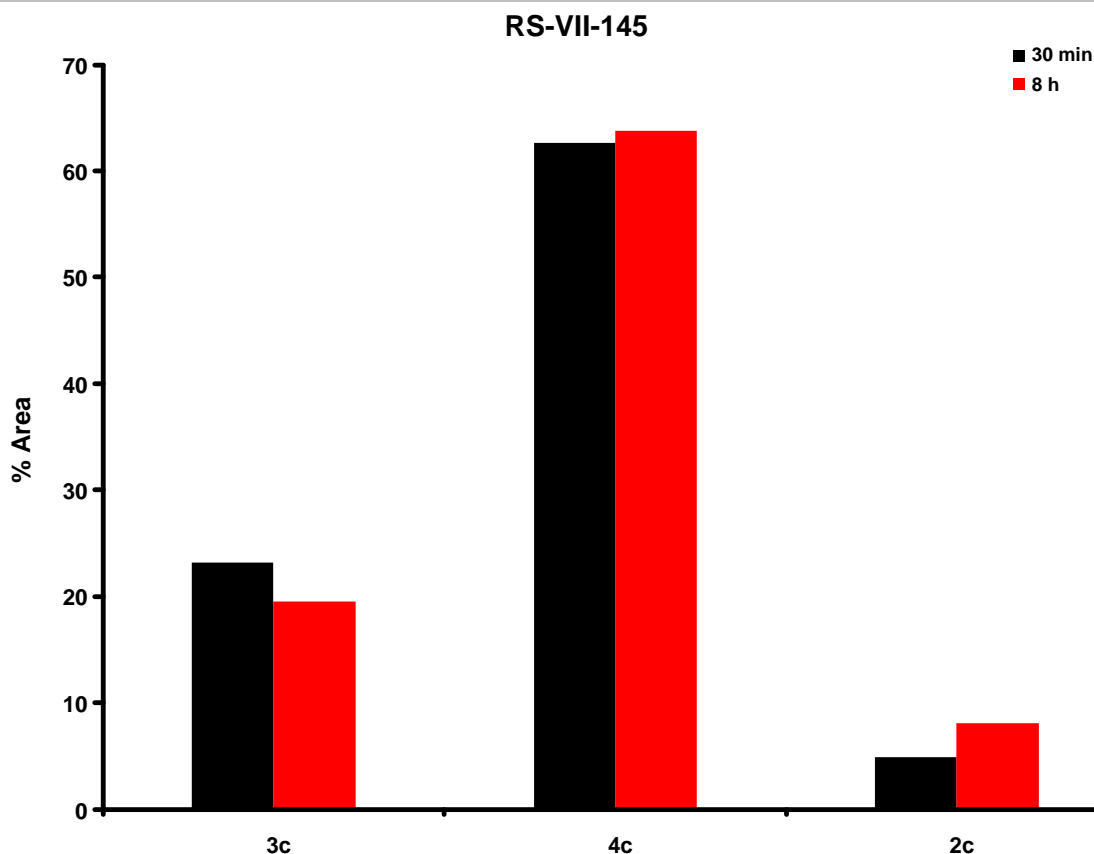

Figure S8 Relative abundance of total peak area for (**1c**) and 2-methyl-2-butene (**1S**) cross metathesis reaction products after 30 min and 8h reaction times. UV detection at 525 nm was used for relative quantitation of reaction products and HRMS detection was used to identify the reaction products.

#### Sulfone (**1d**) and 2-methyl-2-butene (**1S**) cross-metathesis:

Following the general procedure **II**, after 8h reaction time compound **4d** was isolated by column chromatography eluting with EtOAc/hexane (15:85) to yield an orange solid (44 mg, 0.098 mmol, 98%).  $R_f = 0.22$  (30:70, EtOAc/ hexane);  $^1\text{H NMR}$  (300 MHz,  $\text{CDCl}_3$ ):  $\delta$  8.94 (d,  $J = 7.78$  Hz, 1H), 8.38 (d,  $J = 7.63$  Hz, 1H), 8.06 (d,  $J = 1.32$  Hz, 1H), 7.66 (dd,  $J = 9.54, 2.05$  Hz, 1H), 7.59-7.55 (m, 2H), 7.50-7.30 (m, 4H), 6.87 (d,  $J = 9.54$  Hz, 1H), 5.28 (tt,  $J = 7.78, 1.47$  Hz, 1H), 3.81 (d,  $J = 8.07$  Hz, 2H), 1.81 (s, 3H), 1.50 (s, 3H);  $^{13}\text{C NMR}$  (75 MHz,  $\text{CDCl}_3$ ) 160.0, 154.9, 143.9, 142.5, 142.4, 140.3, 137.9, 133.7, 132.9, 132.0, 130.6, 128.9, 128.8, 127.3 (t,  $J = 9.26$  Hz, 1C), 124.5, 120.8, 120.3, 120.0, 113.2, 110.3, 56.3, 25.8, 18.0;  $^{19}\text{F NMR}$  (282 MHz,  $\text{CDCl}_3$ ):  $\delta$  -148.55 (q,  $J = 28.61$  Hz, 2F). UV-Vis (octanol)  $\lambda_{\text{max}}$ : 537 nm,  $\epsilon = 40100 \text{ M}^{-1}\text{cm}^{-1}$ ;  $\lambda_{\text{em}}$ : 572 nm;  $\Phi_f = 0.80$ . Log Po/w = 0.79. HRMS/(m/z): calcd for  $[\text{M}+\text{H}]^+$   $\text{C}_{23}\text{H}_{20}\text{BF}_2\text{N}_3\text{O}_2\text{S}$ : 452.14156; found: 452.14091. Based on the HPLC-MS UV detection, at 30 minutes **3d** was formed as a minor product (25%) and **4d** as major (72%). The product distribution at 8h contained trace amounts of **3d** (1%) and the major produce **4d** (98 %) respectively. No homodimerization product **2d** was detected at 8h.

## SUPPORTING INFORMATION

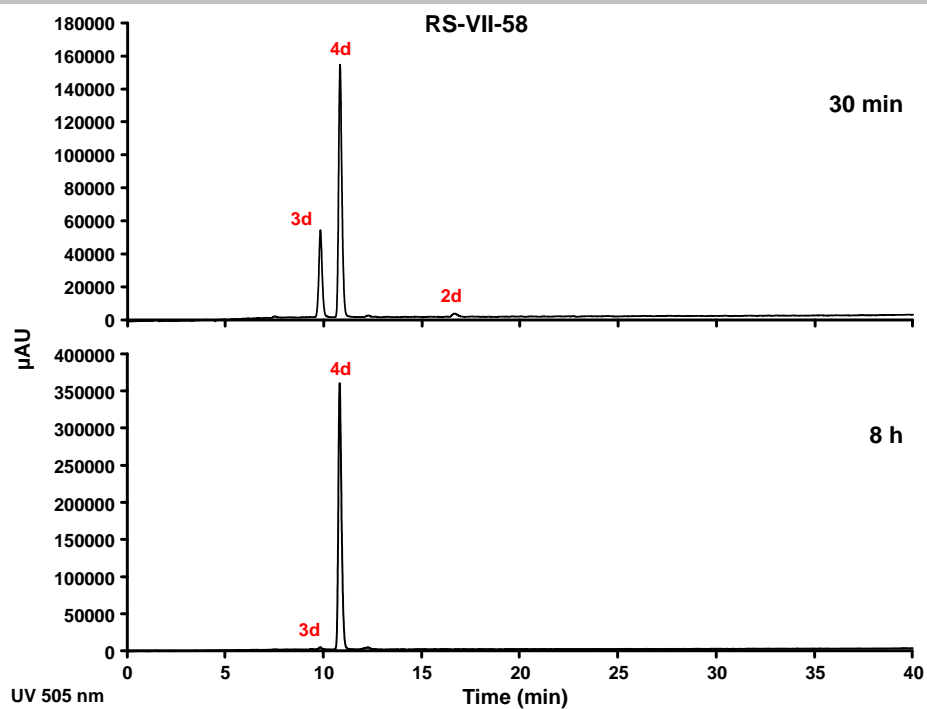

Figure S9. HPLC-UV-MS chromatogram of allyl sulfone (**1d**) and 2-methyl-2-butene (**1S**) cross-metathesis reaction products after 30 min and 8h reaction times. UV detection at 525 nm was used for relative quantitation of reaction products and HRMS detection was used to identify the reaction products.

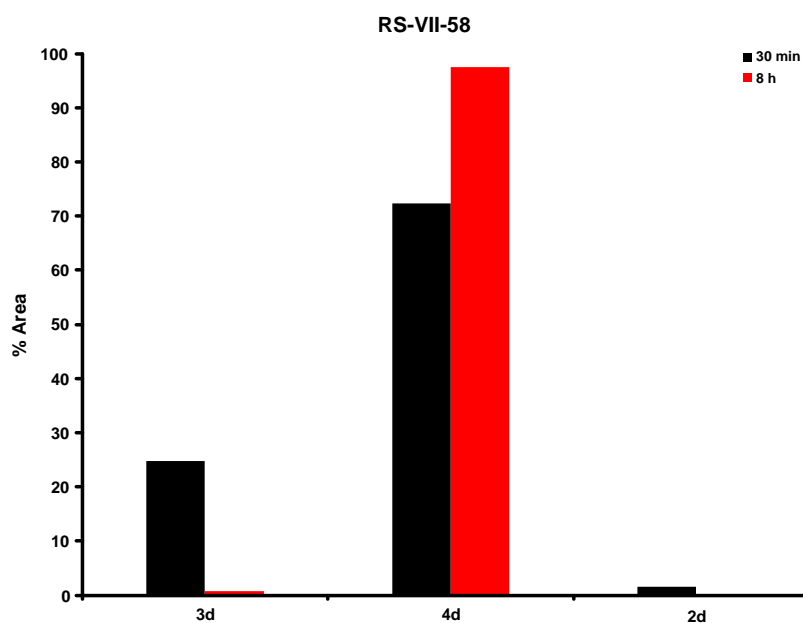

Figure S10. Relative abundance of total peak area for allylic sulfone (**1d**) and 2-methyl-2-butene (**1S**) cross-metathesis reaction products after 30 min and 8h reaction times. UV detection at 525 nm was used for relative quantitation of reaction products and HRMS detection was used to identify the reaction products.

## SUPPORTING INFORMATION

### Secondary cross-metathesis of sulfone homodimer (2d) with 2-methyl-2-butene(2S)

The homodimer 2d (10 mg, 0.012 mmol), 2-methyl-2-butene 2S (142  $\mu$ L, 1.22 mmol), HG(II) catalyst (0.4 mg, 0.0006 mmol) and dichloromethane (2 mL, 0.006M) were combined and heated at 40  $^{\circ}$ C. The aliquot at 30 min and 8h were analyzed.

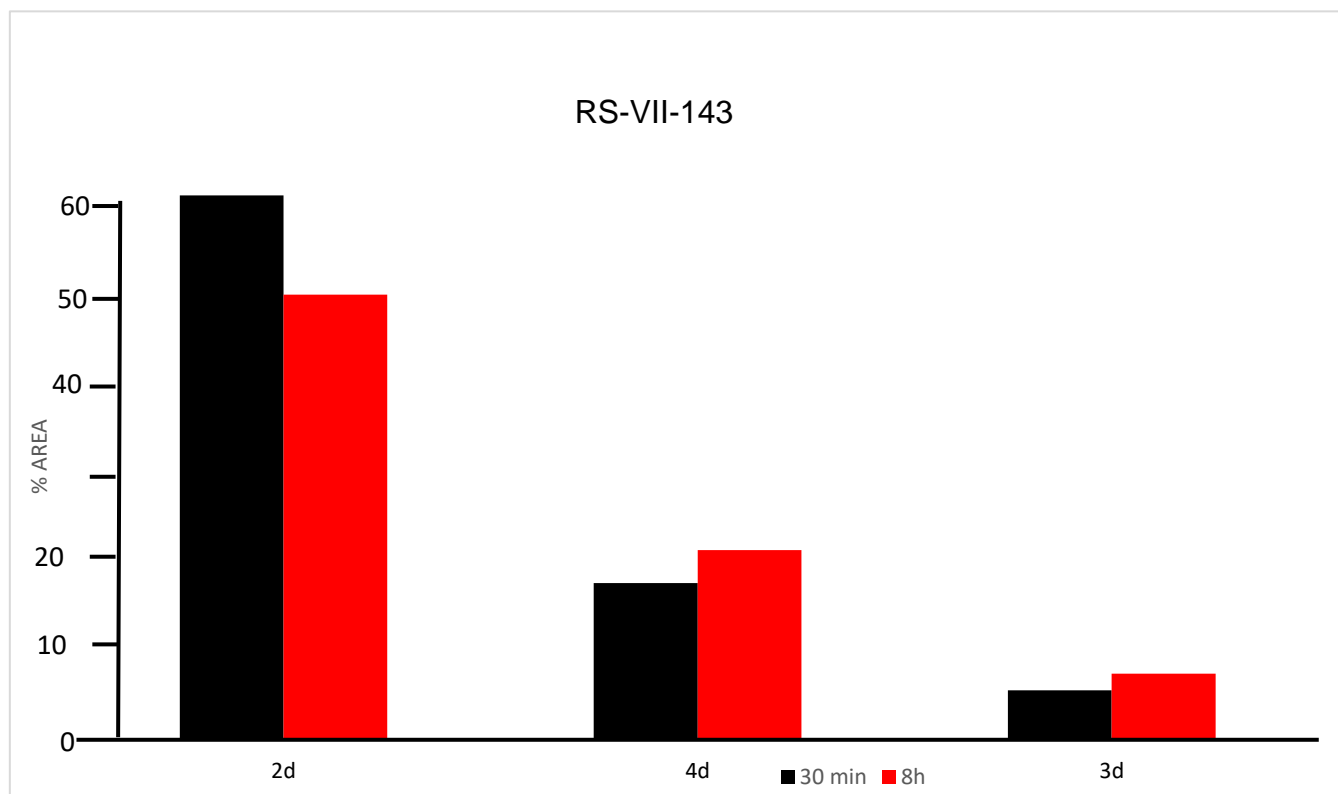

Figure S11. Relative abundance of total peak area for allylic sulfone homodimer (2d) and 2-methyl-2-butene (1S) cross-metathesis reaction products after 30 min and 8h reaction times. UV detection at 525 nm was used for relative quantitation of reaction products and HRMS detection was used to identify the reaction products

### Sulfone (1d) and citral (2S) cross-metathesis:

The allylic sulfone **1d** (21 mg, 0.05 mmol), citral (94  $\mu$ L, 0.05 mmol), HG(II) catalyst (1.5 mg, 0.0025 mmol) and dichloromethane (1 mL, 0.05M) were combined and heated to reflux at 40  $^{\circ}$ C for 1h. An aliquot of the reaction mixture was passed through a short column of silica gel (800 mg) and the colored fractions were collected and analyzed by HPLC-MS. The product distribution was quantified as shown in the Scheme 4. The remaining reaction mixture was purified by flash chromatography to isolate **5d** (11 mg, 43%), **4d** (7.5 mg, 33 %) and **2d** (6.7 mg, 24 %) as orange solids. The spectral properties of **5d** are as follows:  $R_f$  = 0.44 (5:95, MeOH:DCM);  $^1\text{H NMR}$  (300 MHz,  $\text{CDCl}_3$ ):  $\delta$  9.98 (d,  $J$  = 7.8 Hz, 1 H), 8.94 (d,  $J$  = 7.8 Hz, 1 H), 8.36 (d,  $J$  = 7.9 Hz, 1 H), 8.19 - 7.98 (m, 1 H), 7.65 - 7.25 (m, 6 H), 6.88 (d,  $J$  = 9.5 Hz, 1 H), 5.87 (dd,  $J$  = 8.0, 12.8 Hz, 1 H), 5.79 - 5.49 (m, 2 H), 3.78 (d,  $J$  = 7.0 Hz, 2 H), 2.65 (t,  $J$  = 7.8 Hz, 1 H), 2.42 - 2.19 (m, 3 H), 2.19 - 2.10 (m, 2 H), 1.96 (s, 1 H);  $^{19}\text{F NMR}$  (282 MHz,  $\text{CDCl}_3$ )  $\delta$  = -149.83-149.52(m, 2F);  $^{13}\text{C NMR}$  (50 MHz,  $\text{CDCl}_3$ )  $\delta$  191.1, 190.3, 162.1, 162.0, 160.0, 155.2, 142.6, 142.5, 140.5, 140.2, 139.9, 138.2, 137.7, 137.6, 133.9, 133.0, 132.0, 130.6, 128.9, 128.9, 128.7, 127.4(t,  $J$  = 8.83Hz, 1C), 120.6, 120.3, 120.0, 117.7, 117.3, 116.2, 113.5, 60.0, 59.9, 39.2, 31.6, 31.4, 29.9, 29.7, 24.9, 17.5.

None of the possible cross-metathesis products from reaction at the electron deficient  $\alpha$ - $\beta$  unsaturated alkene were detected. For comparison, an authentic sample of **6d** was synthesized by an alternative route. The allylic sulfone **1d** (21 mg, 0.05 mmol), acrolein (16.6  $\mu$ L, 0.25 mmol), HG(II) catalyst (1.5 mg, 0.0025 mmol) and dichloromethane (1 mL, 0.05M) were heated to reflux at 40  $^{\circ}$ C for 2h. The reaction mixture was passed through a pad of celite, volatiles were removed under reduced pressure, and the residue was purified by column chromatography. The compound **6d** (17 mg, 75%) was isolated as an orange solid.  $R_f$  = 0.51 (5:95, MeOH:DCM);  $^1\text{H NMR}$  (200 MHz,  $\text{CDCl}_3$ )  $\delta$  = 9.68 - 9.58 (m, 1 H), 8.97 - 8.83 (m, 1 H), 8.35 (d,  $J$  = 7.8 Hz, 1 H), 8.20 - 8.07 (m, 1 H), 7.64 - 7.22 (m, 9 H), 6.91 - 6.70 (m, 2 H), 6.37 - 6.18 (m, 1 H), 4.11 (d,  $J$  = 7.4 Hz, 2 H);  $^{19}\text{F NMR}$  (282 MHz,  $\text{CDCl}_3$ )  $\delta$  = -150.05-149.74 (m, 2F);  $^{13}\text{C NMR}$  (50MHz,  $\text{CDCl}_3$ )  $\delta$  = 191.7, 159.9, 156.0, 142.6, 142.6, 142.5, 140.7, 139.7, 139.3, 137.6, 137.0, 134.0, 133.8, 133.2, 133.2, 131.9, 130.5, 128.9, 128.9, 127.7, 127.5, 127.3, 126.8, 120.5, 120.4, 120.0, 113.9, 59.6

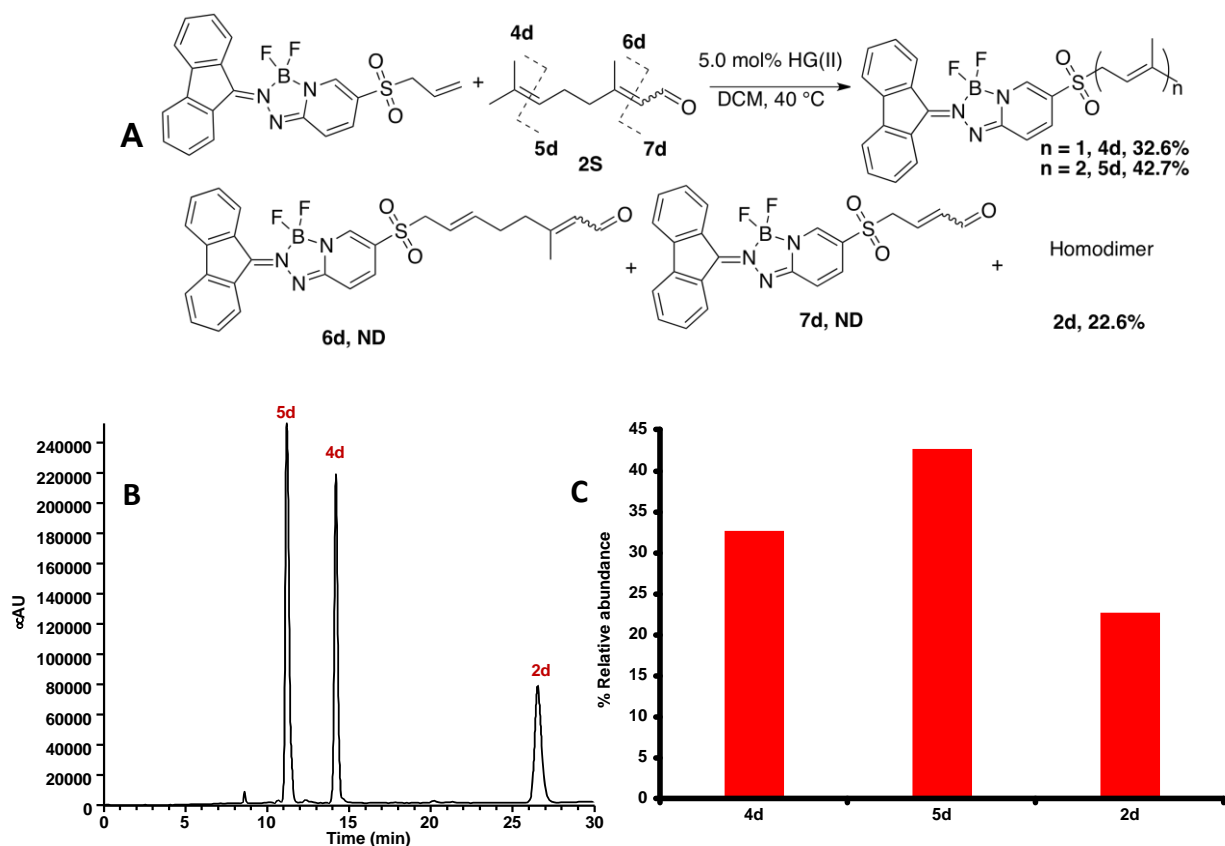

Figure S12. Cross-metathesis of **1d** with citral. A) Cross-metathesis reactions were conducted using 1.0 equiv citral (**2S**), 1.0 equiv of **1d** in dichloromethane (0.05M), 5 mol% HG(II) at 40 °C, monitored for 1h; B) HPLC chromatogram of reaction mixture; C) quantification of product distribution (%) by integration of UV chromatographic peaks at 505 nm. Product identities for chromatographic peaks were determined by accurate mass measurement and isotopic fine structure analysis provided by in-line high resolution mass spectrometry after UV detection.

#### Sulfone (**1d**) and squalene (**3S**) cross-metathesis:

The allylic sulfone (**1d**) (21 mg, 0.05 mmol), squalene (120  $\mu$ L, 0.25 mmol), HG(II) catalyst (1.5 mg, 0.0025 mmol) and dichloromethane (1 mL, 0.05M) were combined and heated to reflux at 40 °C for one hour. An aliquot of the reaction mixture was passed through a short column of silica gel and the colored fractions were collected and analyzed by HPLC-MS. The products were quantified as shown in Scheme 5. The remaining reaction mixture was concentrated and purified by column chromatography to isolate **4d** (9 mg, 0.02 mmol, 40%).

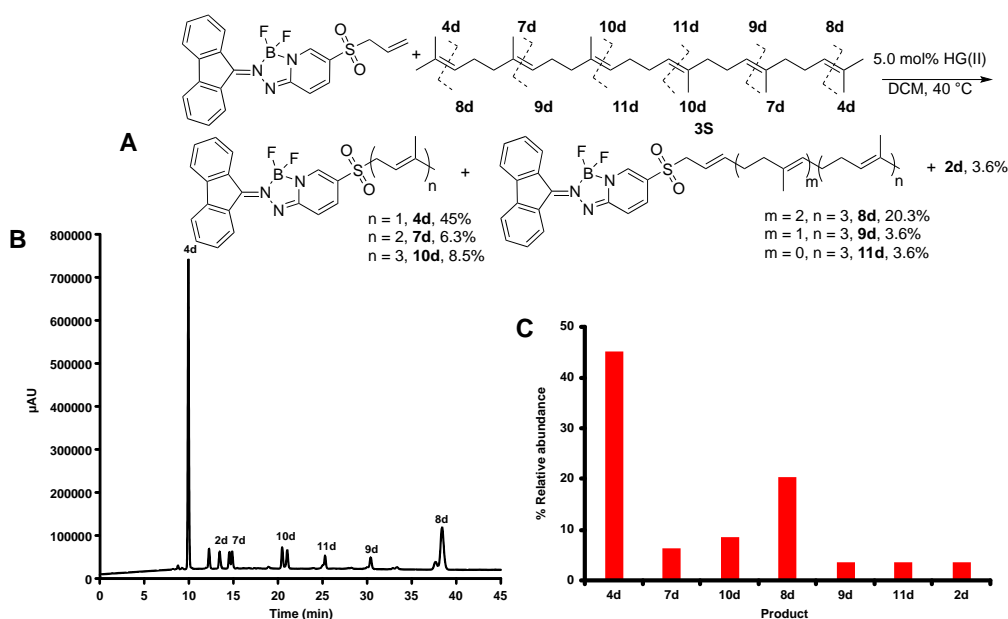

Figure S13. Cross-metathesis of **1d** with squalene. A) Cross-metathesis reactions were conducted using 5.0 equiv squalene (**3S**), 1.0 equiv of **1d** in dichloromethane (0.05M), 5 mol% HG(II) at 40 °C monitored for 1h; B) HPLC chromatogram of reaction mixture; C) quantification of product distribution (%) by integration of UV chromatographic peaks at 505 nm. Product identities for chromatographic peaks were determined by accurate mass measurement and isotopic fine structure analysis provided by in-line high resolution mass spectrometry after UV detection

### General procedure (III) for cross-metathesis reactions with tetrasubstituted alkene **4S**:

Each of the metathesis probes (0.05 mmol) were treated with 2,3-dimethyl-2-butene (**4S**) (177  $\mu\text{L}$ , 1.5 mmol), HG(II) catalyst (1.5 mg, 0.0025 mmol), in 1,2-dichloroethane and heated at 60 °C for 4h. An aliquot of the reaction mixture was passed through a short column of silica gel and the colored fractions were collected and analyzed by HPLC-MS. The respective quantification histogram and the HPLC chromatogram are shown below.

#### Sulfide probe (**1c**) and 2,3-dimethyl-2-butene (**4S**) cross-metathesis:

Following the general procedure (III), the reaction of **1c** and tetrasubstituted alkene **4S** was carried out and the product **4c** (5 mg, 0.011 mmol, 24.4%) and homodimer **2c** (6 mg, 0.007 mmol, 31.3%) were detected.

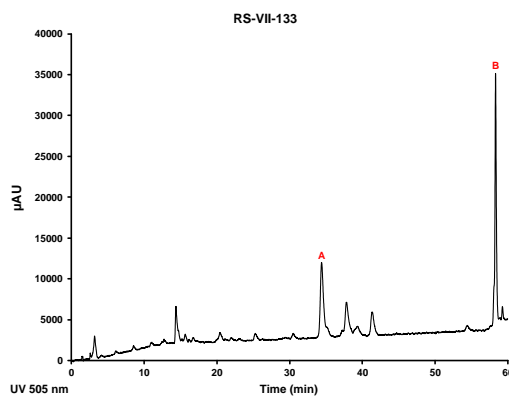

Figure S14. HPLC- MS chromatogram of allylic sulfide (**1c**) and 2,3-dimethyl-2-butene (**4S**) cross-metathesis reaction products after 30 min and 8h reaction times. UV detection at 525 nm was used for relative quantitation of reaction products and HRMS detection was used to identify the reaction products.

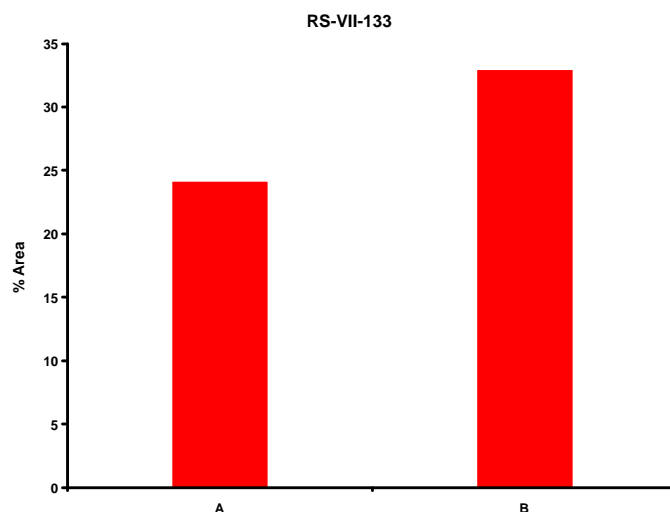

Figure S15. Relative abundance of total peak area for allylic sulfide (**1c**) and 2,3-dimethyl-2-butene (**4S**) cross-metathesis reaction products after 30 min and 8h reaction times. UV detection at 525 nm was used for relative quantitation of reaction products and HRMS detection was used to identify the reaction products.

#### Sulfone probe (**1d**) and 2,3-dimethyl-2-butene (**4S**) cross-metathesis:

Following the general procedure (**III**), the reaction of **1d** and **4S** was carried out and the product **4d** (59%) and homodimer **2d** (31%) were detected. The reaction mixture was purified by flash chromatography to isolate **4d** (12 mg, 0.027 mmol, 54%), and **2d** (5 mg, 0.006 mmol, 30%) respectively. The chromatogram and the histogram associated with the products are shown below.

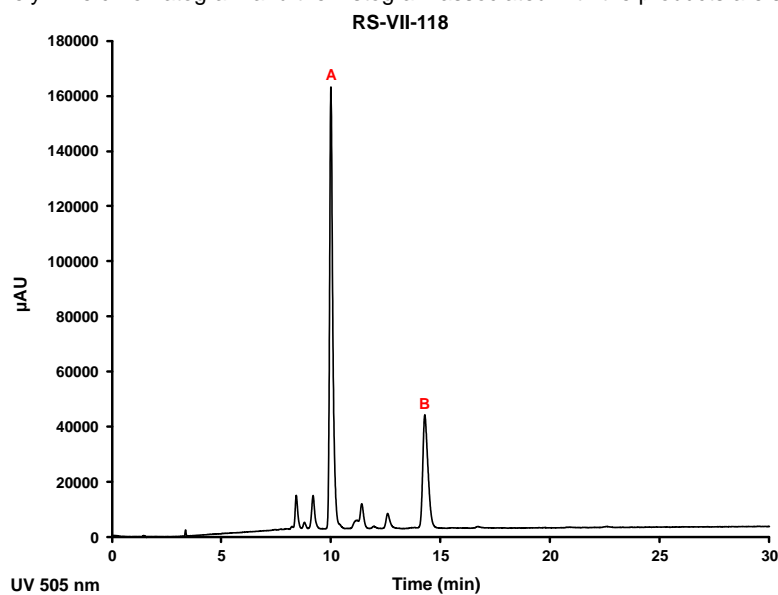

Figure S16. HPLC-MS chromatogram of the cross-metathesis reaction products from allylic sulfone (**1d**) and 2,3-dimethyl-2-butene (**4S**) after 30 min and 8h reaction times. UV detection at 525 nm was used for quantitation of reaction products and HRMS detection was used to identify the reaction products.

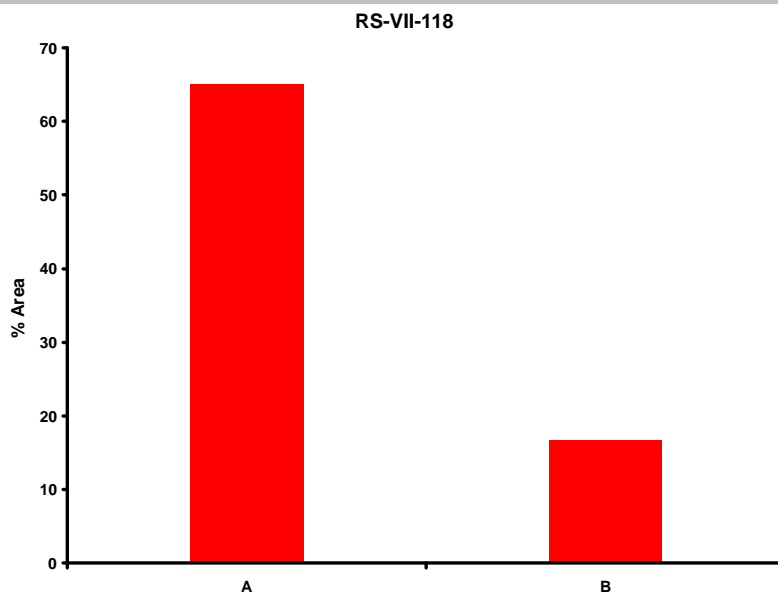

Figure S17. Relative abundance of total peak area for allylic sulfone (**1d**) and 2,3-dimethyl-2-butene (**4S**) cross-metathesis reaction products after 30 min and 8h reaction times. UV detection at 525 nm was used for relative quantitation of reaction products and HRMS detection was used to identify the reaction products.

#### Methyl allyl sulfone (**12**) and 2,3-dimethyl-2-butene (**4S**) cross-metathesis:

Following the general procedure (**III**), the methyl allyl sulfone (**12**) and the tetrasubstituted alkene (**4S**) cross-metathesis was carried out and the products **13** (3.7 mg, 0.025 mmol, 50%) and **14** (2.1 mg, 0.01mmol, 40%) were isolated. The spectral data for each product are shown below.

##### 3-methyl-1-(methylsulfonyl)but-2-ene (**13**)

$^1\text{H NMR}$  (300 MHz,  $\text{CDCl}_3$ ):  $\delta$  5.41 – 5.27 (m, 1H), 3.71 (ddt,  $J = 8.1, 1.7, 0.9$  Hz, 2H), 2.81 (t,  $J = 0.8$  Hz, 3H), 1.84 (q,  $J = 1.1$  Hz, 3H), 1.75 (t,  $J = 1.0$  Hz, 3H);  $^{13}\text{C NMR}$  (50 MHz,  $\text{CDCl}_3$ )  $\delta$  142.98, 110.92, 65.99, 39.30, 26.16, 18.50.

##### 1,4-bis(methylsulfonyl)but-2-ene (**14**)

$^1\text{H NMR}$  (300 MHz,  $\text{DMSO}-d_6$ ):  $\delta$  5.97 – 5.88 (m, 2H), 4.03 – 3.95 (m, 4H), 2.93 (s, 6H);  $^{13}\text{C NMR}$  (50 MHz,  $\text{DMSO}-d_6$ )  $\delta$  126.96, 57.06, 39.52.

#### Phenyl allyl sulfone (**15**) and 2,3-dimethyl-2-butene (**4S**) cross-metathesis:

Following the general procedure (**III**), the phenyl allyl sulfone (**15**) and the tetrasubstituted alkene (**4S**) cross-metathesis was carried out and the products **16** (5.2 mg, 0.025 mmol, 50%) and **17** (3.3 mg, 0.01mmol, 40%) were isolated.

##### ((3-methylbut-2-en-1-yl)sulfonyl)benzene (**16**)

$^1\text{H NMR}$  (200 MHz,  $\text{CDCl}_3$ ):  $\delta$  7.87 (dd,  $J = 1.1, 7.9$  Hz, 2 H), 7.75 - 7.45 (m, 3 H), 5.20 (t,  $J = 7.6$  Hz, 1 H), 3.79 (d,  $J = 8.0$  Hz, 2 H), 1.72 (s, 3 H), 1.31 (s, 3 H)  
 $^{13}\text{C NMR}$  (50 MHz,  $\text{CDCl}_3$ ):  $\delta = 142.9, 138.7, 133.5, 128.9, 128.5, 110.4, 56.2, 25.8, 17.7$ .

##### 1,4-bis(phenylsulfonyl)but-2-ene (**17**)

$^1\text{H NMR}$  (300 MHz,  $\text{CDCl}_3$ )  $\delta$  7.85 (d,  $J = 7.4$  Hz, 4H), 7.62 (dt,  $J = 32.5, 7.4$  Hz, 6H), 5.62 (d,  $J = 5.0$  Hz, 2H), 3.82 – 3.73 (m, 4H). The spectral properties of compound **17** were identical to the published values.<sup>[2]</sup>

## SUPPORTING INFORMATION

### Phenylvinyl sulfone (18) and 2,3-dimethyl-2-butene (4S) cross-metathesis:

Following the general procedure (III), phenylvinyl sulfone **18** and tetrasubstituted alkene (4S) were subjected to the cross-metathesis reaction conditions and monitored over an extended 12 h period. Analysis of the composition of the reaction mixture by 300 MHz <sup>1</sup>H-NMR showed only unreacted **18**, and no trisubstituted cross metathesis product was detected.

### 1-(allyloxy)-4-methoxybenzene (19) and 2,3-dimethyl-2-butene (4S) cross-metathesis:

The allylic ether 1-(allyloxy)-4-methoxybenzene (19) was synthesized following the reported procedure,<sup>[5]</sup> and used as an additional model chalcogenide substrate for the cross metathesis with 2,3-dimethyl-2-butene (4S). The reaction was conducted following the general procedure III. The reaction mixture was purified by silica gel chromatography eluted with hexanes to remove the homodimerization product, catalyst and other impurities. The resulting major fraction consisted of unreacted **19** and trace amounts (~7%) of the trisubstituted cross metathesis product determined by integration of the characteristic peak for the methyl groups that appear as singlet at  $\delta$ 1.8 in the 300 MHz <sup>1</sup>H-NMR (CDCl<sub>3</sub>) (see spectrum page 70).<sup>[6]</sup>

### Computational details

Electronic structure calculations were performed with the Gaussian 09 package, revision D01 or E01.<sup>[7]</sup> For the density functional theory (DFT) calculations, we used M06-L functional<sup>[8]</sup> and def2-SV(P) basis set<sup>[9]</sup> (for Ru, the 28 core electrons were treated using the effective core potential approach).<sup>[10]</sup> Solvent effects were evaluated using the implicit integral equation formalism polarizable continuum model (IEF-PCM, referred in the text as PCM)<sup>[11]</sup> with the dichloromethane solvent parameters. In all DFT calculations, ultrafine Lebedev's grid was used with 99 radial shells per atom and 590 angular points in each shell. The wave function stability tests<sup>[12]</sup> were performed to ensure that the closed-shell singlet states were the solutions with the lowest energy. Tight cutoffs on forces and atomic displacement were used to determine convergence in geometry optimization procedure. Hessian matrices were calculated for the optimized structures to confirm absence of imaginary frequencies or presence of a single imaginary frequency for minima and transition states, respectively. The M06-L functional with def2-SV(P) basis was found to be effective for the HG(II) catalyst as shown by the small differences between the computed and X-ray data shown in Figure S15 and Table S3.

Results from the DFT calculations were further refined by the single-point calculations at the DLPNO-CCSD(T)/def2-TZVP level<sup>[13]</sup> using Orca v4.0 program<sup>[14]</sup> according to the following scheme<sup>[15]</sup>:

$$H^{DLPNO-CCSD(T)} = E_{gas}^{DLPNO-CCSD(T)} + (E_{solv}^{M06L} - E_{gas}^{M06L}) + H_{corr}^{M06L} \quad (\text{Eq. S1})$$

$$G^{DLPNO-CCSD(T)} = E_{gas}^{DLPNO-CCSD(T)} + (E_{solv}^{M06L} - E_{gas}^{M06L}) + G_{corr}^{M06L} \quad (\text{Eq. S2})$$

where  $E_{gas}$  and  $E_{solv}$  are the electronic energies in gas- and solvent phase from the DFT calculations, and enthalpic/entropic corrections  $H_{corr}$  and  $G_{corr}$  were calculated by DFT using the standard approximations of quantum harmonic oscillator (for the vibrational component of the partition functions), rigid rotor (for the rotational component), and particle-in-the box (for the translational component) for  $T = 298.15$  K and  $P = 1$  atm.

The reaction complex approach was used for the evaluation of the enthalpy/free energy changes along reaction coordinate in order to minimize the error in the calculated entropy contribution.<sup>[15,16]</sup>



## Validation of the computational model

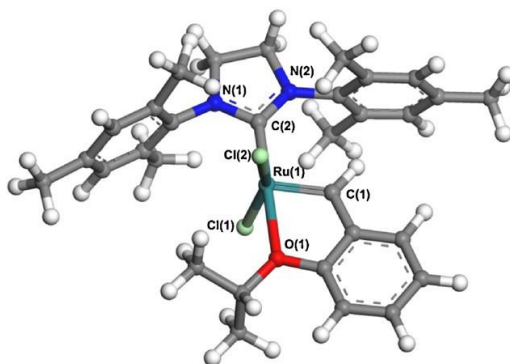

Figure S18. Equilibrium geometry of the HG(II) catalyst, calculated at the M06-L/def2-SV(P)+PCM(Dichloromethane) level of theory

Table S3. Comparison of the structural parameters of HG(II) pre-catalyst, obtained by X-ray crystallography and DFT calculations

| Structural parameter | X-ray <sup>a</sup> | DFT <sup>b</sup> | % Error |
|----------------------|--------------------|------------------|---------|
| Bond lengths (Å)     |                    |                  |         |
| Ru(1) C(1)           | 1.82               | 1.84             | 1.09    |
| Ru(1) C(2)           | 1.98               | 1.97             | 0.50    |
| Ru(1) O(1)           | 2.26               | 2.34             | 3.50    |
| Ru(1) Cl(1)          | 2.32               | 2.4              | 3.40    |
| Ru(1) Cl(2)          | 2.34               | 2.41             | 2.90    |
| C(2) N(1)            | 1.35               | 1.35(6)          | 0.44    |
| C(2) N(2)            | 1.35               | 1.36             | 0.74    |
| Bond angles (°)      |                    |                  |         |
| C(1) Ru(1) O(1)      | 79.3               | 77.9             | 1.7     |
| C(1) Ru(1) C(2)      | 101.6              | 102.7            | 1.1     |
| C(2) Ru(1) O(1)      | 176.2              | 179              | 1.5     |
| C(1) Ru(1) Cl(1)     | 100.16             | 99.9             | 0.3     |
| C(1) Ru(1) Cl(2)     | 100.16             | 97.5             | 2.6     |
| O(1) Ru(1) Cl(1)     | 86.8               | 85.4             | 1.7     |
| O(1) Ru(1) Cl(2)     | 85.3               | 84.2             | 1.3     |
| C(2) Ru(1) Cl(1)     | 90.9               | 93.7             | 3.1     |
| C(2) Ru(1) Cl(2)     | 96.6               | 96.5             | 0.0     |

## SUPPORTING INFORMATION

|                   |       |       |     |
|-------------------|-------|-------|-----|
| Cl(1) Ru(1) Cl(2) | 156.4 | 157.4 | 0.6 |
| N(1) C(2) N(2)    | 106.9 | 106.7 | 0.2 |

<sup>a</sup>Crystallographic data obtained from Garber et al.<sup>[17]</sup>

<sup>b</sup> Calculated at the M06-L/def2-SV(P)+PCM(MeCN) level of theory.

### Archive entries from the calculation files

The archive entries, formerly intended for the Browse Quantum Chemistry Database System, are organized as a simple list of data fields separated by backslash symbols, which is wrapped in 70-char text lines. The script 'Parse.Archive.pl', written in Perl, converts archive entry into human readable format. To use this script,

Check if Perl interpreter is installed on the system. To do this, run the command 'perl -v' in console. If console returns a message like 'command not found', please obtain and install a Perl interpreter ([www.perl.org/get.html](http://www.perl.org/get.html)); Perl is Open Source software licensed under GNU GPL).

Save the script code, listed below, as a file named 'Parse.Archive.pl'.

Select an archive entry of interest and save it as another file (e.g. 'B-Xb.txt').

Run the command 'perl Parse.Archive.pl B-Xb.txt > B-Xb-parsed.txt' in console. The parsed archive entry will be stored in the file 'B-Xb-parsed.txt' in this example. In some cases, absolute path to the Perl interpreter might need to be provided.

```
# --- Parse.Archive.pl ---

# Merge all strings in one line
my $s='';
while (<>) {chomp;$s .= $_}
$_ = $s;

# Some PDF viewers (like Mac OS's Preview) might substitute
# 'end of line' symbols by the white space symbols,
# To remove these extra white spaces, please uncomment the following lines:
# my $str_length = 70;
# my $index = $str_length;
# while (length($_) > $index) {
#     substr $_,$index,1,'';
#     $index += $str_length;
# }

# Replace all backslashes by new-line symbols
s:\\:\n:g;

# Print the resulting output
print;

# --- END ---
```

## HG(II) –2,3-dimethyl-2-butene (4S) initiation reaction evaluation

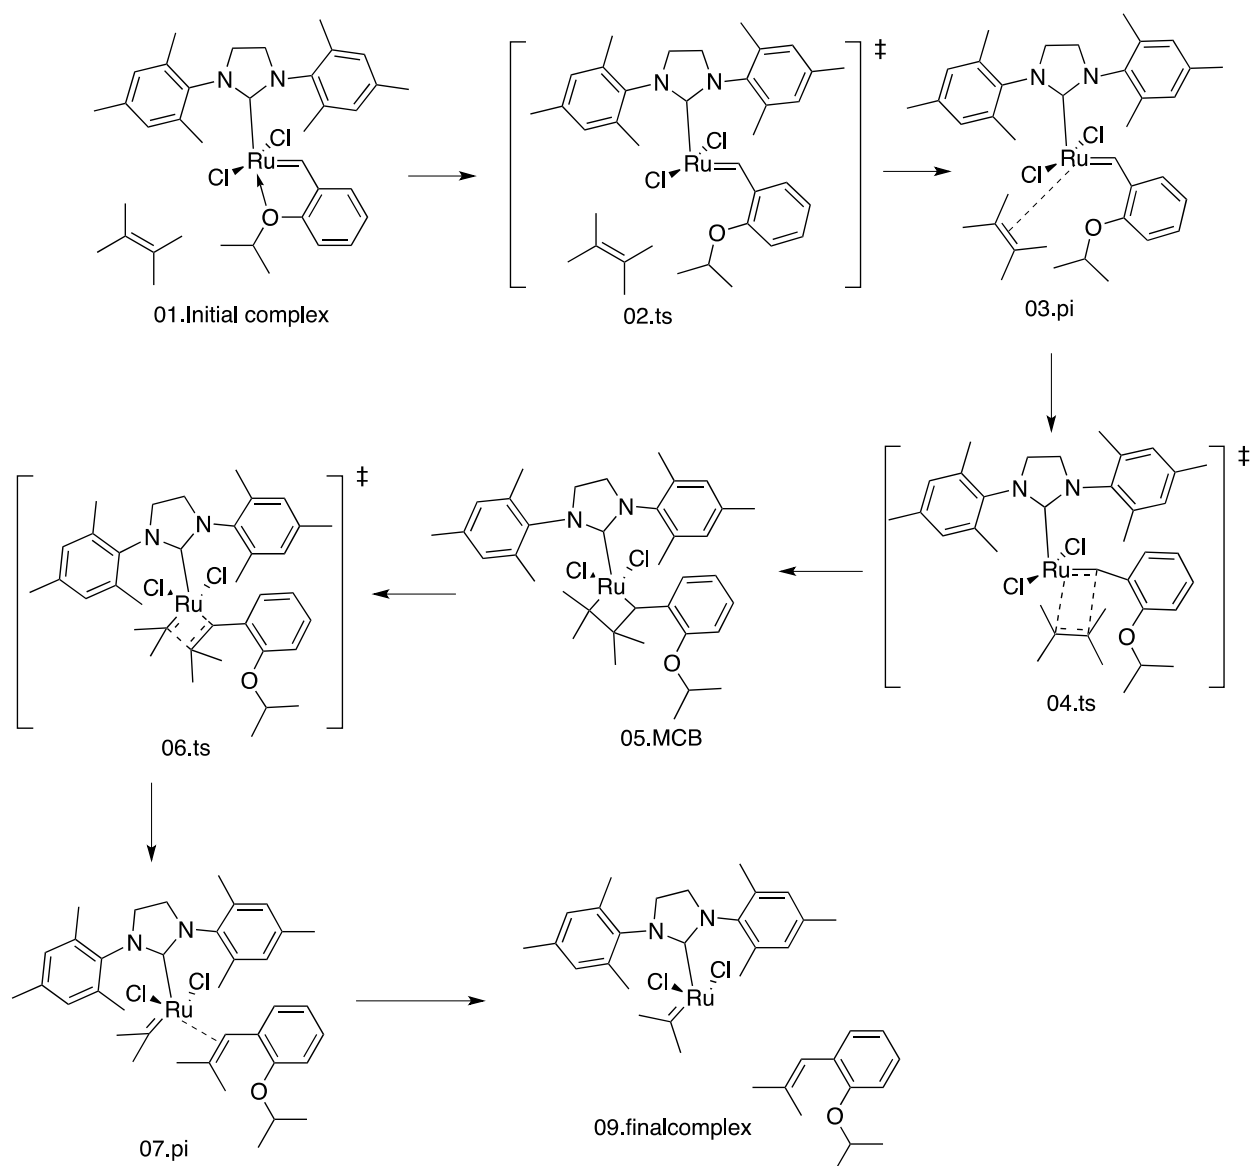

Scheme 3 Reaction of HG(II) and 2,3-dimethyl-2-butene(4S) (tetrasubstituted alkene)

**01.initialcomplex**

```
1\1\GINC-C08\Stability\RM06L\Gen\C37H50Cl2N2O1Ru1\RISHIRAMT\23-Aug-201
7\0\#\#P M06L/chkbasis stable(opt) pop(nbo) scrf(check) guess(read) geo
```

## SUPPORTING INFORMATION

m(allcheck) nosym scf(fermi,xqc,maxcyc=200) int(grid=ultrafine)\Title  
\0,1\C,0,-4.6120297301,-1.3656533198,6.8281565818\C,0,-5.3755047988,-  
1.4098912047,5.6432038279\C,0,-6.1715020965,-2.530124564,5.3294062394\  
C,0,-6.0683651252,-3.6613444483,6.145013717\C,0,-5.2341071101,-3.69193  
78843,7.2675258971\C,0,-4.5443173594,-2.5234208508,7.6095112084\N,0,-5  
.3706486462,-0.2921133761,4.7565459818\C,0,-4.5297271846,-0.1829416975  
,3.6894886506\N,0,-4.8795224361,0.9465158179,3.0279157009\C,0,-6.00407  
55633,1.6559233597,3.6452175025\C,0,-6.3624771038,0.7737853725,4.83740  
69404\Ru,0,-3.1136509058,-1.5299486106,3.4456127994\C,0,-3.1987385692,  
-7.40297566,4.290675147\C,0,-2.428940387,-7.3167142932,3.1790933004\  
C,0,-4.3244847121,1.4232760122,1.8074563157\C,0,-3.2728205115,2.35309166  
31,1.8461760366\C,0,-2.7327261092,2.7849624271,0.6300741979\C,0,-3.209  
732741,2.3164370895,-0.6000682219\C,0,-4.2660284091,1.3968753221,-0.59  
56490306\C,0,-4.8383634257,0.9356416384,0.5938303248\C,0,-2.7113123774  
,2.8110617917,3.1554667027\C,0,-2.5835715075,2.7592579052,-1.887177733  
1\C,0,-5.918827671,-0.0996729596,0.5897017017\C,0,-7.1651492417,-2.497  
0120118,4.2103404708\C,0,-5.0757370537,-4.9381159905,8.0830994342\C,0,  
-3.9696366364,-0.1009327693,7.3058582859\C,0,-2.3151306247,-1.00155032  
67,1.8692465954\C,0,-1.2779740917,-1.8215841286,1.2940702152\C,0,-0.70  
78994294,-1.5524047114,0.0347629371\C,0,0.2633896653,-2.3901801872,-0.  
5024957349\C,0,0.6798961013,-3.5131284079,0.2192045596\C,0,0.144204269  
, -3.8071627892,1.4764171156\C,0,-0.8263126082,-2.9607064765,2.00960240  
2\O,0,-1.438664026,-3.1222873914,3.2037622314\C,0,-1.0102040568,-4.125  
2728163,4.1715917598\C,0,-2.1200010019,-4.2177629168,5.1893260225\C1,0  
, -1.6239518661,-0.4695486333,5.0122181591\C1,0,-4.5219828128,-3.225890  
6098,2.4768342369\C,0,0.3216429119,-3.734787857,4.7711189485\H,0,1.441  
8016658,-4.1799263351,-0.2000574302\H,0,0.4889391432,-4.6905855651,2.0  
217992436\H,0,-1.0543098624,-0.6689318028,-0.5169868599\H,0,-3.0845867  
236,-4.4432800198,4.7037689441\H,0,-1.8963126912,-5.0215715857,5.91242  
36894\H,0,-2.2164713634,-3.2666211182,5.7461186771\H,0,-6.2848876574,1  
.3035000471,5.8050135959\H,0,-7.3853891712,0.3568205821,4.7724672096\H  
,0,-5.6990443861,2.6762126488,3.9419980331\H,0,-6.8329832314,1.7638356  
196,2.9217216762\H,0,-0.9345496928,-5.08276862,3.6209550981\H,0,-1.904  
1860019,3.5052689782,0.6455018029\H,0,-4.6525865174,1.0181873139,-1.55  
10693081\H,0,-3.9319109229,-2.5085733978,8.5212805328\H,0,-6.662208085  
6,-4.5497158408,5.8915144732\H,0,-6.8032923171,0.215267394,1.173458870  
4\H,0,-6.2569856411,-0.3235200033,-0.4351571819\H,0,-5.5662171299,-1.0  
456958895,1.0457827601\H,0,-1.8910690348,3.5325780742,3.0095506322\H,0  
, -3.4737206361,3.2991632867,3.7899077016\H,0,-2.3174186904,1.958258763  
6,3.7407205746\H,0,-3.7890221675,0.6166914844,6.4919963415\H,0,-4.6202  
415779,0.3924070925,8.0545629198\H,0,-3.0029588974,-0.2970360405,7.797  
5067212\H,0,-3.3127747579,2.7763908752,-2.7146564868\H,0,-2.1351326603  
,3.7632965659,-1.8027719459\H,0,-1.7718314503,2.0727571129,-2.19448747  
79\H,0,-5.0775644219,-4.7246544926,9.1664256134\H,0,-5.8733151763,-5.6  
714685826,7.877154714\H,0,-4.1115215377,-5.4365183552,7.8655224885\H,0  
,0.6982885965,-2.1752249263,-1.4841866558\H,0,0.6509416925,-4.51074026  
31,5.483192926\H,0,0.2265230137,-2.7780648175,5.3118562706\H,0,1.11129  
59097,-3.6230498681,4.0092660356\H,0,-2.5730165664,-0.10136538,1.28461  
91089\C,0,-1.0651240736,-7.9328166306,3.0500984791\C,0,-2.8495355919,-  
6.6088555909,1.924620247\C,0,-2.8106398953,-8.1639259254,5.5245100241\  
C,0,-4.5511448801,-6.7625514482,4.425174691\H,0,-8.1522283966,-2.16313  
06162,4.5872904725\H,0,-7.3083199214,-3.496483777,3.7692084223\H,0,-6.  
868984506,-1.8142933084,3.3985865672\H,0,-1.8814191928,-8.7460572336,5  
.4338320454\H,0,-3.6128937389,-8.8737126485,5.8067145285\H,0,-2.697805  
7631,-7.4868398311,6.3948035138\H,0,-4.7650103886,-5.980866842,3.67911  
58217\H,0,-4.6526600107,-6.2896980235,5.4212417606\H,0,-5.3619016789,-  
7.5175659862,4.3697501726\H,0,-2.2069750784,-5.7281431575,1.7185649564  
\H,0,-3.8890796205,-6.2515554332,1.9273745836\H,0,-2.7274184062,-7.275  
5766297,1.0483360169\H,0,-0.3461946904,-7.2032726889,2.6270035928\H,0,  
-1.0731684876,-8.780669156,2.336122639\H,0,-0.6358437473,-8.301416515,  
3.99406273\Version=ES64L-G09RevE.01\HF=-2638.497564\RMSD=2.622e-09\Di  
pole=-0.6423834,0.5962667,0.0882239\Quadrupole=4.8856427,-5.0566817,0.

## SUPPORTING INFORMATION

171039,-18.3758388,-16.2756337,-6.9016091\PG=C01 [X(C37H50Cl2N2O1Ru1)]  
\\@

### 02.ts

```
1\1\GINC-C09\Stability\RM06L\Gen\C37H50Cl2N2O1Ru1\RISHIRAMT\14-Oct-201
7\0\#\#P M06L/chkbasis stable(opt) pop(nbo) scrf(check) guess(read) geo
m(allcheck) nosym scf(fermi,xqc,maxcyc=200) int(grid=ultrafine)\Title
\0,1\C,0,-5.3371262763,-2.1899390181,6.9709156231\C,0,-6.0110383967,-
2.0217132628,5.7431090944\C,0,-7.096596799,-2.8453241549,5.3871426324\
C,0,-7.4033407361,-3.9270375368,6.222443366\C,0,-6.7024609192,-4.17324
29158,7.4062022329\C,0,-5.6933367964,-3.2752536288,7.7745967352\N,0,-5
.6310707962,-0.9365514303,4.8984241914\C,0,-4.7640875716,-1.0101873354
,3.8503648001\N,0,-4.624656747,0.2517002472,3.3607255303\C,0,-5.335548
8515,1.2496929885,4.1650057351\C,0,-6.1886426638,0.3985065243,5.091927
4435\Ru,0,-3.9570238416,-2.7080286273,3.3330687625\C,0,-3.8676892905,-
6.1444993513,4.0405536818\C,0,-2.7483431552,-6.0116172101,3.2812114764
\C,0,-3.7721142484,0.6948732523,2.3090111134\C,0,-2.4024377583,0.89068
43392,2.5546965287\C,0,-1.5955894411,1.2911220189,1.4834578204\C,0,-2.
1143738849,1.5038588422,0.2014771086\C,0,-3.4890722016,1.3209720573,0.
0038288339\C,0,-4.3348222858,0.9145877236,1.0395049938\C,0,-1.82107750
26,0.6291956576,3.9068448744\C,0,-1.2185654329,1.8831410191,-0.9376477
352\C,0,-5.7811412341,0.6166345323,0.7929837991\C,0,-7.984467828,-2.53
19327027,4.2231422494\C,0,-7.0096689184,-5.3714004095,8.2499747473\C,0
,-4.3212138752,-1.200755442,7.4515457349\C,0,-3.0393944682,-2.11491017
91,1.8510653737\C,0,-1.9298289318,-2.7437765678,1.1444514612\C,0,-2.20
89838863,-3.1568318467,-0.1753774726\C,0,-1.2804687216,-3.8473907342,-
0.9433148494\C,0,-0.0174706635,-4.099902199,-0.404158818\C,0,0.3149734
647,-3.6494534576,0.8714343211\C,0,-0.6227217994,-2.958496862,1.658357
6496\O,0,-0.3565133833,-2.4433416195,2.8699104858\C,0,0.9936133545,-2.
4357380628,3.3721043257\C,0,0.9109188858,-2.2147605892,4.8631756486\C1
,0,-2.4954422319,-2.789313274,5.1987342667\C1,0,-5.7767531186,-3.41970
7392,1.8873691104\C,0,1.7987067017,-1.3642497839,2.6643481287\H,0,0.73
62824048,-4.6375218534,-0.9911793379\H,0,1.3261729028,-3.8307396877,1.
2444803568\H,0,-3.2100808081,-2.9508361236,-0.5762179481\H,0,0.3549569
085,-3.0269280019,5.3564375005\H,0,1.9280458822,-2.1703197562,5.288630
3771\H,0,0.3949270584,-1.2666488787,5.0920897399\H,0,-6.1149905662,0.7
027953869,6.1506138089\H,0,-7.262082202,0.4062714998,4.8172871466\H,0,
-4.6073478793,1.8810959755,4.7110069953\H,0,-5.929520606,1.920465397,3
.5210447169\H,0,1.4391492803,-3.43395901,3.1909971621\H,0,-0.521940439
3,1.4411586727,1.6587890892\H,0,-3.9146089505,1.4822054497,-0.99541006
1\H,0,-5.160645676,-3.426663073,8.7229382785\H,0,-8.2348973013,-4.5877
181054,5.9422577945\H,0,-6.4538656294,1.2048864719,1.443318417\H,0,-6.
0626289075,0.8270409618,-0.2515017933\H,0,-6.0042002131,-0.4486097039,
0.9974746152\H,0,-0.7780449325,0.9826986967,3.9688730461\H,0,-2.393206
8671,1.1276666228,4.7106682061\H,0,-1.8274865773,-0.4530464054,4.13918
54238\H,0,-3.8257393362,-0.6682119938,6.6250530586\H,0,-4.7976057339,-
0.4434379478,8.1049374964\H,0,-3.53572342,-1.6913032693,8.0491985712\H
,0,-0.332097213,2.4432505141,-0.5956541773\H,0,-0.8437018187,0.9854706
643,-1.4652816134\H,0,-1.7442847245,2.4957588352,-1.6893101521\H,0,-6.
8347514099,-5.1768850143,9.3217131808\H,0,-8.0529208248,-5.7071716856,
8.1257905985\H,0,-6.3636961138,-6.2269257792,7.9739496448\H,0,-1.53491
52735,-4.1809327027,-1.9549765938\H,0,2.8463483653,-1.3747472066,3.010
3614486\H,0,1.3769701611,-0.3664048762,2.8792656906\H,0,1.8038408765,-
1.5028417761,1.5695365962\H,0,-3.5863253096,-1.4099997304,1.1977850163
\C,0,-1.3710875419,-5.8024689348,3.8369579871\C,0,-2.7654264149,-6.147
2171593,1.7807626307\C,0,-3.8971546794,-6.0296627957,5.5354169327\C,0,
-5.2052093019,-6.5174870735,3.4723472961\H,0,-8.9129040411,-2.04524662
24,4.5809479771\H,0,-8.2871879612,-3.4444998441,3.6840366185\H,0,-7.51
15427815,-1.8605067808,3.4916434247\H,0,-2.9520402034,-5.6943572761,5.
9856691586\H,0,-4.1804170174,-6.9964830368,6.0003087265\H,0,-4.6748769
618,-5.3059026604,5.8499375512\H,0,-5.2388140695,-6.5434480532,2.37333
2867\H,0,-5.9982015116,-5.8231687536,3.8111763103\H,0,-5.5019929363,-7
```

## SUPPORTING INFORMATION

.5219593216,3.8380395426\H,0,-1.8951680551,-5.6329394638,1.333332081\H,0,-3.668977649,-5.7220758462,1.3112488616\H,0,-2.6964209237,-7.2073783039,1.4616141512\H,0,-0.9702802014,-4.8112630073,3.5526124664\H,0,-0.6762700255,-6.5554159412,3.4131864525\H,0,-1.3095945794,-5.8713943014,4.9333246596\\Version=ES64L-G09RevE.01\HF=-2638.4681528\RMSD=3.365e-09\Dipole=0.6661541,2.2409087,0.5076577\Quadrupole=4.9805473,-15.4220904,10.4415431,-24.7337412,-12.3254765,10.4199567\PG=C01 [X(C37H50Cl2N2O1Ru1)]\@

### **03.pi**

1\1\GINC-C02\Stability\RM06L\Gen\C37H50Cl2N2O1Ru1\RISHIRAMT\17-Jul-2017\0\#\#P M06L/chkbasis stable(opt) pop(nbo) scrf(check) guess(read) geom(allcheck) nosym scf(fermi,xqc,maxcyc=200) int(grid=ultrafine)\Title \\0,1\C,0,-5.3521321754,-2.1806673704,6.9491866972\C,0,-6.124848855,-2.0133108115,5.78075578\C,0,-7.2784328463,-2.7887462572,5.5524810052\C,0,-7.5500706748,-3.8380304123,6.4382160745\C,0,-6.7353599576,-4.1100254867,7.5412442506\C,0,-5.6651154399,-3.2453769525,7.7987982562\N,0,-5.7405700668,-1.0195729243,4.8309273946\C,0,-4.7995213888,-1.2227822802,3.8714865464\N,0,-4.6192137517,-0.041923146,3.2258764277\C,0,-5.5464085836,0.9949654917,3.6902477517\C,0,-6.1473505871,0.3777581262,4.9460944439\Ru,0,-4.0497344581,-3.0223423527,3.5499921531\C,0,-3.8808189981,-5.8174185057,4.0372990298\C,0,-3.1443401526,-5.6564476472,2.8924981641\C,0,-3.6346372396,0.2625815828,2.2417021718\C,0,-2.3218918032,0.5370569698,2.6646494597\C,0,-1.358445671,0.8099551932,1.6877642317\C,0,-1.666445057,0.8184109774,0.3250908879\C,0,-2.9946025861,0.5831916265,-0.0549342907\C,0,-3.9954422051,0.3150105845,0.8806834719\C,0,-1.9676971752,0.5033754151,4.1154101495\C,0,-0.6107974905,1.0703061842,-0.707296872\C,0,-5.3992065694,0.0281692429,0.4478708894\C,0,-8.2510712877,-2.4693987832,4.4609689261\C,0,-6.9900870774,-5.3012597629,8.4117919026\C,0,-4.2904809097,-1.1978605202,7.3335752146\C,0,-3.2116430731,-2.5076058564,1.9695793997\C,0,-1.9669372245,-2.6176844322,1.2286761664\C,0,-2.1620786938,-2.8005480797,-0.1640276129\C,0,-1.1272855947,-3.046700759,-1.0530029468\C,0,0.1782966478,-3.061621848,-0.5603629306\C,0,0.4285811635,-2.8182257024,0.7865505409\C,0,-0.6178735509,-2.5853660929,1.6995781846\O,0,-0.4098094261,-2.3073079051,2.9909358403\C,0,0.9387806579,-2.2438074395,3.5025038145\C,0,0.8734733944,-2.4227254154,4.9996027\C1,0,-2.4050177371,-2.8991797467,5.2900469061\C1,0,-6.0659885883,-3.4351014658,2.1566293209\C,0,1.5953421074,-0.9333280809,3.1137318546\H,0,1.0242934594,-3.2424639637,-1.2339596718\H,0,1.467639163,-2.8076568571,1.121128498\H,0,-3.1956180976,-2.773083493,-0.5342953954\H,0,0.4232042047,-3.3900722043,5.27075871\H,0,1.8949829031,-2.3773288654,5.4154701112\H,0,0.2679284098,-1.6284630191,5.4669884656\H,0,-5.7425324753,0.8221312219,5.8775508702\H,0,-7.2472286963,0.4616691303,4.9876612304\H,0,-5.0053388662,1.9368735414,3.88397289\H,0,-6.3093715807,1.2019079973,2.9151404872\H,0,1.5026504859,-3.0962669173,3.0753507162\H,0,-0.3282446654,1.0146119468,2.0054999442\H,0,-3.255804834,0.5852910897,-1.1219477755\H,0,-5.0503032473,-3.4027952988,8.6950795092\H,0,-8.431275158,-4.4670606327,6.2529719877\H,0,-6.0655950332,0.8981909443,0.6038402187\H,0,-5.4427315989,-0.2164624308,-0.6266674469\H,0,-5.8357256313,-0.8180438221,1.0111699531\H,0,-0.9708302898,0.9401805433,4.2948813981\H,0,-2.6974405972,1.0623408,4.7308275962\H,0,-1.9592844777,-0.537433918,4.4955753637\H,0,-3.7912093928,-0.7461231161,6.4628389474\H,0,-4.7323964043,-0.3780137985,7.9341011351\H,0,-3.5107485498,-1.669065485,7.9528366187\H,0,-0.753214588,2.0449139952,-1.2104830205\H,0,0.4008427934,1.0708195819,-0.2673750466\H,0,-0.632824437,0.3024699475,-1.501541039\H,0,-6.6483634018,-5.1379048379,9.4478210973\H,0,-8.0588581466,-5.5730397637,8.4387750118\H,0,-6.4461372055,-6.1889274423,8.0338628985\H,0,-1.332070145,-3.2103711493,-2.1161937244\H,0,2.6557158725,-0.9330836822,3.4197193609\H,0,1.0974650863,-0.0898957271,3.6226654326\H,0,1.558071859,-0.7451625277,2.0271429388\H,0,-3.9975241345,-2.1911032399,1.2568025409\C,0,-1.6409886581,-5.5582485751,2.9416593392\C,0,-3.6997392704,-5.8515719869,1.5133210214\C,0,-3.2334800843,-6.001148509,5.3791566527\C,0,-5.348339

## SUPPORTING INFORMATION

```
6811,-6.1292576329,4.0694322377\H,0,-9.1423677489,-1.9681265413,4.8867
69848\H,0,-8.6056806995,-3.3818233512,3.9539604557\H,0,-7.8218814152,-
1.8121652128,3.6914745142\H,0,-2.1891657214,-5.6655452809,5.4262374112
\H,0,-3.2584651917,-7.080685285,5.6362100829\H,0,-3.7894340554,-5.4767
084749,6.1778177723\H,0,-5.8649043195,-6.0019573709,3.1093047858\H,0,-
5.8710382009,-5.4934031403,4.8109732717\H,0,-5.4968343217,-7.174059636
7,4.4112703003\H,0,-3.3257694421,-5.08386897,0.8115460406\H,0,-4.79681
49559,-5.843430317,1.4615078979\H,0,-3.3424269757,-6.825107343,1.11821
60923\H,0,-1.2301113003,-5.2985615093,1.9501988906\H,0,-1.1882480853,-
6.5279190233,3.2307293527\H,0,-1.2886015304,-4.7987597445,3.6620818658
\\Version=ES64L-G09RevE.01\HF=-2638.4716866\RMSD=4.383e-09\Dipole=1.12
76558,1.7095284,0.1936758\Quadrupole=-1.2685307,-6.9490205,8.2175512,-
21.9671805,-8.6102177,7.0956034\PG=C01 [X(C37H50Cl2N2O1Ru1)]\@
```

### 04.ts

```
1\1\GINC-C01\Stability\RM06L\Gen\C37H50Cl2N2O1Ru1\RISHIRAMT\16-Jul-201
7\0\#\#P M06L/chkbasis stable(opt) pop(nbo) scrf(check) guess(read) geo
m(allcheck) nosym scf(fermi,xqc,maxcyc=200) int(grid=ultrafine)\Title
\0,1\C,0,-5.1042384937,-1.8932247225,7.1610909974\C,0,-5.8046088193,-
1.9532230828,5.942728704\C,0,-6.818269422,-2.9057397387,5.7243633697\C
,0,-7.0472180476,-3.8633322534,6.7182651425\C,0,-6.3240110155,-3.87696
05534,7.915990393\C,0,-5.3762344002,-2.8697070663,8.1245246279\N,0,-5.
5109963725,-0.9919502217,4.9273697724\C,0,-4.7436332504,-1.1962017774,
3.8377410462\N,0,-4.6603826111,-0.0392290206,3.1567639887\C,0,-5.31755
94841,1.0712648967,3.8575102921\C,0,-6.0668648253,0.3651419321,4.97789
69222\Ru,0,-3.9268190441,-3.0172879476,3.2965530733\C,0,-4.1816357645,
-5.1431925926,3.6111677192\C,0,-3.1170510133,-5.156010654,2.6045195948
\C,0,-3.9535524198,0.1918679612,1.9388287806\C,0,-2.5525544885,0.30511
77446,1.96645943\C,0,-1.8865165118,0.5540394769,0.7621152346\C,0,-2.57
06325701,0.6935939519,-0.4477849369\C,0,-3.967884615,0.6121354069,-0.4
28665869\C,0,-4.6831478838,0.3778550727,0.7491927327\C,0,-1.7865765965
,0.1581425728,3.2413723781\C,0,-1.8361709688,0.9117497514,-1.734944574
6\C,0,-6.1803538824,0.3696137037,0.7321005741\C,0,-7.6621326264,-2.869
0870152,4.489290463\C,0,-6.5455429716,-4.9516104134,8.9353518877\C,0,-
4.1170339821,-0.8053658826,7.4474744485\C,0,-2.7541001343,-3.214908261
,1.8012092983\C,0,-1.4125299672,-2.8729114938,1.3274074235\C,0,-1.3627
093328,-2.6248708863,-0.0670612909\C,0,-0.2360822941,-2.1453967578,-0.
7191678471\C,0,0.9070301688,-1.8795257417,0.033361933\C,0,0.9244529308
,-2.1361521455,1.4011762954\C,0,-0.1984963014,-2.6725642962,2.05762602
23\O,0,-0.1853204905,-3.0437947495,3.3359828593\C,0,0.9978907253,-2.92
73441607,4.1502480591\C,0,0.8964506344,-3.9920244577,5.2181119959\Cl,0
,-2.4740956257,-2.7464262965,5.2432975949\Cl,0,-5.6997118326,-2.940131
8744,1.5018566332\C,0,1.0994409032,-1.5262721458,4.7131574988\H,0,1.80
71460095,-1.4755758096,-0.4453109743\H,0,1.839986526,-1.9290304544,1.9
601634799\H,0,-2.2805141334,-2.7939910879,-0.6446697196\H,0,0.87022113
77,-5.0003165865,4.7719975926\H,0,1.7734906929,-3.938121731,5.88558738
\H,0,-0.0180101414,-3.8512509807,5.8179370756\H,0,-5.8943278766,0.8171
114623,5.9694695915\H,0,-7.1607385093,0.3319786475,4.8128242768\H,0,-4
.5542723579,1.7827532479,4.227958895\H,0,-5.980941818,1.6248936392,3.1
72017204\H,0,1.8774122806,-3.1516317393,3.5159690334\H,0,-0.79067824,0
.6274078849,0.7715064337\H,0,-4.5258955045,0.7368385601,-1.3666423957\
H,0,-4.8177688423,-2.8462468998,9.0697613964\H,0,-7.8269653691,-4.6188
708896,6.5517042682\H,0,-6.5867952334,1.396671062,0.8167443965\H,0,-6.
5637402979,-0.0449896299,-0.2152163087\H,0,-6.6017748571,-0.2340115301
,1.5513867931\H,0,-0.7616696096,0.5508285715,3.1317814074\H,0,-2.26875
29746,0.6904929732,4.0823668926\H,0,-1.7118951955,-0.8985373343,3.5628
349375\H,0,-3.6539492411,-0.4117506323,6.5285686408\H,0,-4.5994929781,
0.0401700254,7.976143552\H,0,-3.305104349,-1.167112025,8.0999069856\H,
0,-2.2164566933,1.7934217928,-2.2820671304\H,0,-0.7547390626,1.0542115
272,-1.5715732664\H,0,-1.9547447503,0.0482982777,-2.4161303217\H,0,-6.
3057707593,-4.6086513879,9.9558697072\H,0,-7.586579733,-5.3167613385,8
```

## SUPPORTING INFORMATION

.9299212394\H,0,-5.9010380374,-5.8289019133,8.734774893\H,0,-0.2559855012,-1.9622422637,-1.7985658403\H,0,1.999114554,-1.4285199008,5.3451184668\H,0,0.2099009337,-1.304108478,5.3279800316\H,0,1.164057963,-0.7669537272,3.9149801932\H,0,-3.3848736307,-3.358884938,0.9093889398\C,0,-1.7440528718,-5.57040238,3.0695291271\C,0,-3.4774610919,-5.7397249827,1.2540285771\C,0,-3.8640909793,-5.5758423329,5.0266993411\C,0,-5.5569138349,-5.6498905025,3.2391306643\H,0,-8.1948626277,-1.9034890065,4.3968647722\H,0,-8.4251409241,-3.6649817531,4.5084091253\H,0,-7.0712955282,-2.9849223349,3.5619885056\H,0,-2.8700189591,-5.2882729192,5.3855980282\H,0,-3.9496369442,-6.681977212,5.0811306336\H,0,-4.6068033884,-5.1636547397,5.7348496796\H,0,-5.9138982356,-5.3325795896,2.2528324742\H,0,-6.3003570954,-5.3229275349,3.9888804025\H,0,-5.5474953052,-6.7602585485,3.2685003715\H,0,-2.6474149891,-5.6336371232,0.5332726695\H,0,-4.3769670606,-5.281855088,0.8141035867\H,0,-3.6741961867,-6.8235868996,1.3748754124\H,0,-0.988063163,-5.4287040792,2.2774118837\H,0,-1.7641673522,-6.6504278862,3.3201893859\H,0,-1.4146651671,-5.0119087427,3.9553929456\Version=ES64L-G09RevE.01\HF=-2638.4554531\RMSD=1.173e-09\Dipole=0.9519915,1.2241338,0.712498\Quadrupole=-4.4961809,-4.0621376,8.5583185,-16.5675446,-10.5951427,2.0048837\PG=C01 [X(C37H50C12N2O1Ru1)]\@

### 05.MCB

1\1\GINC-JOKER-C13\Stability\RM06L\Gen\C37H50C12N2O1Ru1\RISHIRAM\19-May-2017\0\#\#P M06L/chkbasis stable(opt) pop(nbo) scrf(check) guess(read) geom(allcheck) nosym scf(fermi,xqc,maxcyc=200) int(grid=ultrafine)\Title\0,1\C,0,-5.1886375614,-1.9983905639,7.1708294112\C,0,-5.8294089463,-1.9960404425,5.9191672084\C,0,-6.8517594184,-2.9148145109,5.612896554\C,0,-7.150513841,-3.9039703886,6.5551474786\C,0,-6.4864903254,-3.9819053059,7.7848720894\C,0,-5.5276578589,-3.0074362529,8.0789433967\N,0,-5.4851824507,-0.9918701368,4.9628200128\C,0,-4.7268588844,-1.1657616886,3.8647089175\N,0,-4.629111361,0.0062396812,3.2135517728\C,0,-5.2635540984,1.1016379424,3.9568656528\C,0,-6.0334755173,0.3673335098,5.0452292428\Ru,0,-3.8200584959,-2.9023667623,3.3195299112\C,0,-4.1732787407,-4.8652448599,3.6934814126\C,0,-2.9267176254,-4.9529838194,2.6457527423\C,0,-3.9512061069,0.2487745969,1.9801254896\C,0,-2.5480561432,0.3201329797,1.955493081\C,0,-1.9214065394,0.5542574859,0.7253480735\C,0,-2.6455086351,0.7297066224,-0.4544844531\C,0,-4.0441653243,0.6991509107,-0.3805013451\C,0,-4.7198082679,0.4730942685,0.8200402436\C,0,-1.7229898279,0.1519758931,3.1916193285\C,0,-1.9553738436,0.9392271573,-1.7672165565\C,0,-6.2164961556,0.4941196129,0.8580693242\C,0,-7.6313360264,-2.8069559045,4.3406848521\C,0,-6.7823302106,-5.0895125904,8.7483697749\C,0,-4.2092585524,-0.9347017931,7.5570171842\C,0,-2.6666602011,-3.5929406761,1.8200175265\C,0,-1.3822647489,-3.0781881361,1.2925366948\C,0,-1.4261525621,-2.7536030922,-0.0828208341\C,0,-0.3535287186,-2.2138564777,-0.7807092018\C,0,0.8282552603,-1.9519363564,-0.0915817424\C,0,0.9214002565,-2.2385627066,1.2676122947\C,0,-0.1548678501,-2.8090544668,1.9708790981\O,0,-0.08865935,-3.1219885113,3.2692028133\C,0,1.1101120908,-2.9244557144,4.0398879234\C,0,1.04491099,-3.9020482148,5.1910527434\C1,0,-2.389837865,-2.6053007604,5.2567974072\C1,0,-5.5104726533,-2.7751700322,1.445958878\C,0,1.2099687378,-1.4844759884,4.4977938311\H,0,1.69197722,-1.5157717017,-0.6075692699\H,0,1.8565942669,-2.0148149949,1.7863350255\H,0,-2.3683680554,-2.9347526012,-0.6162343375\H,0,1.0142755777,-4.943070393,4.8283163604\H,0,1.9355124614,-3.7895120412,5.8326664463\H,0,0.1437426795,-3.7176384739,5.8001762832\H,0,-5.8719893659,0.78873498,6.051586209\H,0,-7.1249822398,0.3452466481,4.862883845\H,0,-4.4844302243,1.7773679561,4.3595375667\H,0,-5.9102608002,1.6983866966,3.2925038629\H,0,1.9780871517,-3.1864306668,3.403011189\H,0,-0.8244204542,0.5926187216,0.6939207622\H,0,-4.6331878464,0.8502356957,-1.2952710568\H,0,-5.0184645542,-3.0321285189,9.0515316248\H,0,-7.9382596245,-4.6330519411,6.3219188728\H,0,-6.601608952,1.5246089193,0.9878355671\H,0,-6.6410743767,0.1150094433,-0.086498998\H,0,-6.6205021621,-0.1263363996,1.6741616815\H,0,-0.7657644708,0.6929683766,3.0969524052\H,0,-2.2



## SUPPORTING INFORMATION

37796442,0.5157834005,4.0982568752\H,0,-1.4809482935,-0.908736847,3.39  
26422017\H,0,-3.7013789017,-0.4990592553,6.6821615713\H,0,-4.712924296  
8,-0.113820063,8.1042906232\H,0,-3.4315022689,-1.3339111084,8.22900745  
08\H,0,-2.2890749283,1.8687527597,-2.2634598835\H,0,-0.8599320978,0.99  
20659414,-1.6511573146\H,0,-2.1743139181,0.115711413,-2.4721594577\H,0  
, -6.5749284576,-4.7962887263,9.7911779957\H,0,-7.8327121171,-5.4209349  
192,8.6855064248\H,0,-6.1568460753,-5.9778771024,8.5366435428\H,0,-0.4  
458236156,-1.988823811,-1.8485992146\H,0,2.1334445363,-1.3302200973,5.  
0826380626\H,0,0.3442347687,-1.2315090828,5.1343545578\H,0,1.227754800  
9,-0.7803197707,3.6485686706\H,0,-3.3371365428,-3.6484419463,0.9548575  
283\C,0,-1.6785435349,-5.4980949561,3.324493884\C,0,-3.3315351949,-5.9  
295947415,1.5256854719\C,0,-3.88657112,-5.4016751015,5.0812477853\C,0,  
-5.492997525,-5.4537563308,3.2403799779\H,0,-8.1414341317,-1.827712732  
4,4.2647137158\H,0,-8.4088550332,-3.5869913009,4.2860680957\H,0,-6.994  
2113725,-2.8949893492,3.4413729435\H,0,-2.9302603457,-5.0883671456,5.5  
126343154\H,0,-3.9222972553,-6.5114338113,5.0641223226\H,0,-4.68621399  
64,-5.0704834791,5.7695783547\H,0,-5.8402298953,-5.1140167028,2.257940  
537\H,0,-6.2683699703,-5.1877493137,3.9818962562\H,0,-5.4380930705,-6.  
5616965376,3.2385409095\H,0,-2.4922370712,-6.0317747803,0.8140910647\H  
,0,-4.2135174432,-5.5920231732,0.9609633679\H,0,-3.5439006973,-6.92907  
27253,1.945915839\H,0,-0.8487910955,-5.5587055488,2.5977294901\H,0,-1.  
8731287674,-6.5201796757,3.6964519643\H,0,-1.3464174884,-4.8721875915,  
4.1613517988\\Version=ES64L-G09RevE.01\HF=-2638.4631813\RMSD=5.404e-09  
\Dipole=0.4267255,1.3297858,0.9500823\Quadrupole=-0.7678928,-7.0062311  
,7.774124,-14.4051946,-14.4726112,1.4096941\PG=C01 [X(C37H50Cl2N2O1Ru1  
)]\@

### 06.ts

1\1\GINC-C10\Stability\RM06L\Gen\C37H50Cl2N2O1Ru1\RISHIRAMT\15-Jul-201  
7\0\#\#P M06L/chkbasis stable(opt) pop(nbo) scrf(check) guess(read) geo  
m(allcheck) nosym scf(fermi,xqc,maxcyc=200) int(grid=ultrafine)\Title  
\0,1\C,0,-5.1842996627,-2.0679236955,7.1315384578\C,0,-5.7947806902,-  
2.042370948,5.8656194866\C,0,-6.8567310179,-2.9090756806,5.5432939975\  
C,0,-7.2329441287,-3.8707116693,6.4857833497\C,0,-6.6040785891,-3.9712  
971389,7.7331130148\C,0,-5.5982084137,-3.0497186974,8.03965716\N,0,-5.  
4058121403,-1.0484534773,4.9185304626\C,0,-4.6783262322,-1.2398372059,  
3.7994218816\N,0,-4.600998067,-0.0678112883,3.1422658624\C,0,-5.236513  
1544,1.0325883812,3.8774795684\C,0,-5.935680079,0.3157823342,5.0221771  
56\Ru,0,-3.7876354054,-3.0134942212,3.2458084463\C,0,-4.3413537501,-4.  
7429026058,3.9053171338\C,0,-2.7395500387,-5.052222142,2.6367226978\C,  
0,-3.9215457474,0.2122793158,1.9174356015\C,0,-2.5264614573,0.38857013  
67,1.9210317078\C,0,-1.9049164686,0.7444439233,0.7193670082\C,0,-2.623  
5030096,0.9252691314,-0.4640945843\C,0,-4.0132321529,0.761994626,-0.42  
29525223\C,0,-4.6864558493,0.4244604354,0.7537675988\C,0,-1.7150673735  
,0.2096350891,3.1639794621\C,0,-1.9338757478,1.2973705313,-1.740963261  
4\C,0,-6.1813078989,0.3392391929,0.7655774485\C,0,-7.5847405575,-2.775  
136072,4.24284628\C,0,-6.9844174084,-5.0500349657,8.6998530208\C,0,-4.  
161786136,-1.0523902242,7.5353526553\C,0,-2.554178036,-3.8669065928,1.  
7692532559\C,0,-1.3784032652,-3.1119267604,1.2763526688\C,0,-1.5391474  
715,-2.6224154905,-0.0397387242\C,0,-0.5461289471,-1.9417674975,-0.731  
8677438\C,0,0.6681956539,-1.6998591845,-0.0949957884\C,0,0.8654694921,  
-2.1310851562,1.2144718733\C,0,-0.1332756106,-2.8325220566,1.912993760  
4\O,0,0.0325454278,-3.2801744107,3.1636799567\C,0,1.2252682577,-3.0029  
391378,3.9157427177\C,0,1.2492226213,-4.0048518469,5.0472931899\C1,0,-  
2.3025921999,-2.6116592611,5.1531233382\C1,0,-5.4005044898,-2.94014601  
97,1.3211594957\C,0,1.2312016779,-1.5715544186,4.4123439435\H,0,1.4742  
627214,-1.1636597896,-0.6103620102\H,0,1.8244558352,-1.9246777881,1.69  
58611886\H,0,-2.5042888597,-2.7991971795,-0.5315320182\H,0,1.247160331  
8,-5.0393109203,4.6652220795\H,0,2.157552903,-3.8655475972,5.657736562  
4\H,0,0.3669733694,-3.8698811115,5.6962490672\H,0,-5.70296875,0.745878  
4921,6.0115584951\H,0,-7.0372785407,0.3026658735,4.9171023844\H,0,-4.4

## SUPPORTING INFORMATION

```
633433042,1.7462839107,4.2205894618\H,0,-5.9293139422,1.5859377518,3.2
20543512\H,0,2.0993282157,-3.1863239095,3.2581598284\H,0,-0.815226157,
0.8766428816,0.711224586\H,0,-4.5989226635,0.9089459205,-1.3406176826\
H,0,-5.1136466759,-3.092625367,9.0242178518\H,0,-8.0534090114,-4.55851
55125,6.2397609726\H,0,-6.6381481914,1.3425550917,0.8734548104\H,0,-6.
5612698186,-0.0807016937,-0.1809315178\H,0,-6.5558121225,-0.2965396394
,1.5831237269\H,0,-0.7403855903,0.7181621114,3.0726149243\H,0,-2.22610
42302,0.6009656028,4.0622602224\H,0,-1.5155241809,-0.8567415985,3.3828
018866\H,0,-3.6299741495,-0.6312187147,6.6679894171\H,0,-4.6332453916,
-0.2176845138,8.0904100715\H,0,-3.4062900949,-1.4930519636,8.207166190
8\H,0,-2.2038042385,2.3188758857,-2.0681187937\H,0,-0.8361529484,1.262
7338633,-1.6388533534\H,0,-2.2174473375,0.622211721,-2.5683714797\H,0,
-6.791185374,-4.7549739051,9.7448551821\H,0,-8.048681024,-5.3265983897
,8.610725108\H,0,-6.4011257302,-5.9727455473,8.5163972868\H,0,-0.72621
32807,-1.5947358319,-1.7551031177\H,0,2.151593295,-1.3714650171,4.9882
25554\H,0,0.3592829651,-1.3991371866,5.0666446351\H,0,1.1867796844,-0.
842319949,3.5862507163\H,0,-3.2341524495,-3.9624234718,0.914900298\C,0
,-1.6255285309,-5.5671397881,3.512126523\C,0,-3.3487926318,-6.18382400
05,1.8191883495\C,0,-3.9613866685,-5.2890137265,5.252687574\C,0,-5.586
8672587,-5.4253290745,3.4106403513\H,0,-8.0418505416,-1.7725754614,4.1
386720992\H,0,-8.3979509713,-3.5158430102,4.163912288\H,0,-6.917558579
9,-2.9028172906,3.369577741\H,0,-2.9806351353,-4.9744799521,5.62358059
22\H,0,-4.0257442195,-6.3963541644,5.2566415449\H,0,-4.7148561942,-4.9
272808494,5.9807517017\H,0,-5.9123796325,-5.1222590729,2.4081906233\H,
0,-6.3947891504,-5.1660794156,4.1219160646\H,0,-5.4953309123,-6.527294
3728,3.4595603364\H,0,-2.5747294081,-6.5444155547,1.114416219\H,0,-4.2
145276968,-5.861899829,1.2197815294\H,0,-3.6442182085,-7.0444180962,2.
4430103204\H,0,-0.7496705627,-5.8024535845,2.8786410592\H,0,-1.9280366
891,-6.5030685317,4.0132033022\H,0,-1.3011212058,-4.8400349654,4.26626
56997\\Version=ES64L-G09RevE.01\HF=-2638.4582013\RMSD=3.892e-09\Dipole
=0.1923022,1.1475892,1.182131\Quadrupole=-0.2061878,-6.4478108,6.65399
87,-10.5788053,-17.3530572,-3.6988343\PG=C01 [X(C37H50Cl2N2O1Ru1)]\\@
```

### 07.pi

```
l\l\GINC-C11\Stability\RM06L\Gen\C37H50Cl2N2O1Ru1\RISHIRAMT\15-Jul-201
7\0\#\#P M06L/chkbasis stable(opt) pop(nbo) scrf(check) guess(read) geo
m(allcheck) nosym scf(fermi,xqc,maxcyc=200) int(grid=ultrafine)\Title
\0,1\C,0,-5.4771755236,-2.0028611784,7.1156346377\C,0,-5.9600643342,-
1.9993259523,5.7950997118\C,0,-7.0447351565,-2.8082636517,5.4085501068
\C,0,-7.5985866053,-3.6693405304,6.3607258246\C,0,-7.1326704724,-3.714
5117127,7.6805267156\C,0,-6.0804902253,-2.8641559132,8.0370873788\N,0,
-5.4435938896,-1.0536513799,4.865626441\C,0,-4.7106077731,-1.258150487
2,3.7409452429\N,0,-4.6460566155,-0.0671339309,3.0886440053\C,0,-5.389
7196603,1.0030619517,3.7554789819\C,0,-5.8909688145,0.3346527092,5.021
3248305\Ru,0,-3.6694058655,-2.8468380282,3.090711813\C,0,-4.3325317806
,-4.1427607243,4.2613559917\C,0,-2.1437575373,-5.1134728111,2.35462900
88\C,0,-4.1939919935,0.2045651919,1.7608558265\C,0,-2.9167428191,0.767
8797349,1.5725832083\C,0,-2.5657228725,1.1888746751,0.2873007068\C,0,-
3.4189679573,1.0289777042,-0.8089262908\C,0,-4.6864634841,0.4847453365
,-0.5806748642\C,0,-5.1114103623,0.1033203792,0.696357372\C,0,-1.95369
62126,0.9159362868,2.7059759823\C,0,-2.9748838213,1.4175698409,-2.1855
423861\C,0,-6.5340422267,-0.3114146432,0.909052051\C,0,-7.6000617918,-
2.7308680702,4.0211753828\C,0,-7.7277292518,-4.6646180422,8.6738984146
\C,0,-4.3214144587,-1.1416706463,7.519520591\C,0,-1.9016318815,-3.9799
984313,1.6039726313\C,0,-0.8479895448,-2.9590436561,1.4890168066\C,0,-
1.096380786,-1.9454429177,0.5436671223\C,0,-0.1568543431,-0.9729190932
,0.2141230826\C,0,1.0721787421,-0.9755593278,0.8653184761\C,0,1.359418
6766,-1.959064048,1.8115869636\C,0,0.4314243272,-2.9658936898,2.112639
0156\O,0,0.7103960683,-4.0030005175,2.9222416589\C,0,1.92150628,-4.035
298033,3.6936302138\C,0,2.0977326566,-5.4655824946,4.150211153\C1,0,-1
.8496985042,-2.1495500232,4.6117975205\C1,0,-5.1425375627,-3.302761045
```

## SUPPORTING INFORMATION

8, 1.1686367187\C, 0, 1.8433287312, -3.0615899775, 4.8515360526\H, 0, 1.83018  
82266, -0.2183643229, 0.6325725911\H, 0, 2.3389192184, -1.9505065917, 2.2959  
793594\H, 0, -2.0724737946, -1.9428985983, 0.0379633505\H, 0, 2.0932569348, -  
6.1596684115, 3.2929805367\H, 0, 3.0593887167, -5.5785889222, 4.678219363\H  
, 0, 1.2922501395, -5.7637297057, 4.8435455377\H, 0, -5.4593988422, 0.7753107  
214, 5.9379539705\H, 0, -6.9905637966, 0.3665118363, 5.1262192185\H, 0, -4.72  
81250694, 1.8665734865, 3.9486615378\H, 0, -6.2078004356, 1.3577269357, 3.10  
0622853\H, 0, 2.7670341823, -3.7745440163, 3.0257471622\H, 0, -1.5836192656,  
1.655373872, 0.1393368274\H, 0, -5.3868217864, 0.3829619111, -1.4204497419\  
H, 0, -5.7002567525, -2.8846461768, 9.0670803622\H, 0, -8.4380368592, -4.3130  
561076, 6.0650767901\H, 0, -7.1929196274, 0.5771714403, 0.971163929\H, 0, -6.  
9011147789, -0.9214717505, 0.0677296923\H, 0, -6.6727715909, -0.9020689377,  
1.8273158954\H, 0, -1.1301077791, 1.5997242283, 2.4402814767\H, 0, -2.437420  
7601, 1.2954502454, 3.6236290178\H, 0, -1.5082304422, -0.0580551099, -2.98421  
8841\H, 0, -3.6032327258, -1.0127434613, 6.6899697824\H, 0, -4.6453884521, -0  
.1316373109, 7.8364628078\H, 0, -3.7820334888, -1.5793568955, 8.3762218915\  
H, 0, -3.8279580782, 1.6191897426, -2.8548282133\H, 0, -2.3290533335, 2.31242  
97844, -2.1713466252\H, 0, -2.382743698, 0.6093652913, -2.6565570513\H, 0, -7  
.6444023931, -4.2856398039, 9.7063096737\H, 0, -8.7924241817, -4.8639326834  
, 8.4652127479\H, 0, -7.2118195811, -5.6433149379, 8.6517436151\H, 0, -0.3838  
389189, -0.2263915664, -0.5528569583\H, 0, 2.7833034661, -3.0765901678, 5.42  
99235398\H, 0, 1.012864919, -3.3361210708, 5.5245752264\H, 0, 1.6666098201, -  
2.0265515371, 4.5138977492\H, 0, -2.5555206127, -3.9358948493, 0.7216420737  
\C, 0, -1.4657637133, -5.5845145364, 3.5997277274\C, 0, -3.044628294, -6.1360  
254699, 1.7224713597\C, 0, -3.9162052271, -4.3126679077, 5.688549606\C, 0, -5  
.2632924574, -5.237203912, 3.8362921396\H, 0, -7.98141808, -1.7158225067, 3.  
7979159543\H, 0, -8.4387380876, -3.4341644482, 3.887073504\H, 0, -6.83912007  
7, -2.953832332, 3.2480231934\H, 0, -3.4564214096, -3.426601431, 6.141086067  
6\H, 0, -3.1611130047, -5.1249310177, 5.7271293055\H, 0, -4.7688505762, -4.65  
84201503, 6.3073925486\H, 0, -5.4773619777, -5.2687163755, 2.7604499704\H, 0  
, -6.2216307086, -5.1120508106, 4.3800814522\H, 0, -4.8750820427, -6.2202606  
747, 4.173970408\H, 0, -2.4176813879, -6.8343885026, 1.1313949746\H, 0, -3.77  
70211331, -5.6843517233, 1.0326553349\H, 0, -3.5783717902, -6.7570556426, 2.  
4593434354\H, 0, -0.5938243379, -6.2139100608, 3.3417366728\H, 0, -2.1510105  
545, -6.2324446146, 4.1763990207\H, 0, -1.1126510741, -4.7638452962, 4.23845  
73947\\Version=ES64L-G09RevE.01\HF=-2638.4748326\RMSD=1.822e-09\Dipole  
=-0.3813507, 0.5481757, 1.6800426\Quadrupole=2.3314385, -7.8345195, 5.5030  
81, -8.838495, -22.8232037, -13.8331636\PG=C01 [X(C37H50C12N2O1Ru1)]\@

### 09.finalcomplex

1\1\GINC-COMET-16-70\Stability\RM06L\Gen\C37H50C12N2O1Ru1\RISHIRAM\24-  
Oct-2017\0\#\#P M06L/chkbasis stable(opt) pop(nbo) scrf(check) guess(re  
ad) geom(allcheck) nosym scf(fermi,xqc,maxcyc=200) int(grid=ultrafine)  
\Title\0, 1\C, 0, -5.0407255839, -1.840538934, 6.7865509857\C, 0, -5.547053  
5763, -1.7810682362, 5.4766416345\C, 0, -6.5612765583, -2.6567318422, 5.0436  
638679\C, 0, -7.0059187658, -3.6413810829, 5.9310538951\C, 0, -6.50691632, -3  
.7473518803, 7.2352960836\C, 0, -5.5375066123, -2.8264966538, 7.6451230466\  
N, 0, -5.1137884051, -0.7384244654, 4.6093668319\C, 0, -4.365286668, -0.80541  
19691, 3.4751136805\N, 0, -4.3738791748, 0.4439281099, 2.9198621037\C, 0, -5.  
2511914067, 1.378329703, 3.6204539571\C, 0, -5.5939064375, 0.6201053804, 4.8  
897275732\Ru, 0, -3.331111712, -2.2113902178, 2.5845235766\C, 0, -3.64455289  
16, -3.6813047267, 3.6682534173\C, 0, -0.8157388639, -6.1538331663, 1.902417  
384\C, 0, -3.8822653927, 0.790380562, 1.6225562255\C, 0, -2.5982649491, 1.362  
4430344, 1.5051111125\C, 0, -2.1496483104, 1.7195923528, 0.2309330289\C, 0, -  
2.9332461841, 1.5316137026, -0.913015687\C, 0, -4.2279729375, 1.0305384573,  
-0.7488550094\C, 0, -4.7358298136, 0.6786310563, 0.5068828204\C, 0, -1.74882  
99722, 1.6131390195, 2.709270392\C, 0, -2.385740701, 1.8401438797, -2.271892  
2222\C, 0, -6.1730031477, 0.2814462597, 0.6413277778\C, 0, -7.1762864259, -2.  
5086614922, 3.6891431115\C, 0, -6.9845952083, -4.8284701494, 8.1554881025\  
C, 0, -3.9571877073, -0.9142473564, 7.2468837065\C, 0, -0.8872006001, -5.36861  
72634, 0.8070610194\C, 0, -0.6031659718, -3.929326094, 0.7058600125\C, 0, -1.

## SUPPORTING INFORMATION

---

5410861569,-3.0937694697,0.0795735034\C,0,-1.3335134587,-1.7201178205,  
-0.0743112824\C,0,-0.1333566259,-1.1687634651,0.3692175435\C,0,0.83662  
05311,-1.9750046254,0.9626119306\C,0,0.6146694179,-3.3480672595,1.1415  
6793\O,0,1.526907436,-4.1985683026,1.6631512753\C,0,2.7371412511,-3.70  
38127974,2.253620046\C,0,3.6585029223,-4.8969680274,2.3619791205\C1,0,  
-1.2874149509,-1.717281918,3.8095806094\C1,0,-4.9221651767,-2.72607277  
47,0.8323093216\C,0,2.4536689481,-3.054579952,3.5934629613\H,0,0.05729  
71594,-0.0943118478,0.2573548257\H,0,1.7712907507,-1.5165200055,1.2972  
973598\H,0,-2.4714756899,-3.5428451373,-0.2883334733\H,0,3.8391252999,  
-5.3489149569,1.3725293173\H,0,4.6303392669,-4.5971667937,2.7881890539  
\H,0,3.219542577,-5.6697400661,3.0175970323\H,0,-5.0821833642,1.031764  
0945,5.7794440838\H,0,-6.6755900197,0.5995512903,5.1077625699\H,0,-4.7  
2947164,2.3322376942,3.8101074055\H,0,-6.1426296789,1.6056335207,3.003  
8437525\H,0,3.1903123212,-2.9664108715,1.5602651971\H,0,-1.149620098,2  
.1619881203,0.1291750904\H,0,-4.8765582715,0.9193595019,-1.6278917818\  
H,0,-5.1343083011,-2.8897307078,8.6645751967\H,0,-7.791631663,-4.33311  
80054,5.5993591881\H,0,-6.8155261338,1.1807749911,0.717157761\H,0,-6.5  
159306925,-0.2830199812,-0.2406765908\H,0,-6.3623329364,-0.346031465,1  
.525914028\H,0,-0.8530672089,2.1995965665,2.4449870204\H,0,-2.29910669  
89,2.1710895745,3.4888001222\H,0,-1.415832774,0.6682064347,3.176542921  
\H,0,-3.2955914225,-0.6090401935,6.4169559852\H,0,-4.3639100407,0.0116  
953961,7.6966571145\H,0,-3.3332606727,-1.3891426254,8.0224538201\H,0,-  
3.1848742781,2.0133316212,-3.0117473\H,0,-1.7277893122,2.7259710501,-2  
.259754747\H,0,-1.7735670381,0.9985851661,-2.6503906395\H,0,-6.8745522  
573,-4.5449204889,9.2155074648\H,0,-8.0428445429,-5.0830989368,7.97540  
89212\H,0,-6.4068641193,-5.7613110536,8.0127160641\H,0,-2.1053762734,-  
1.0954166751,-0.541567728\H,0,3.3788124802,-2.6310023012,4.0213800497\  
H,0,2.0567023437,-3.8000826668,4.3053506099\H,0,1.7098661944,-2.243955  
6948,3.5114202464\H,0,-1.2605721779,-5.8333145664,-0.1198991192\C,0,-0  
.4515470075,-5.6464600259,3.2604016431\C,0,-1.1510688532,-7.6096821706  
,1.8261284344\C,0,-3.3293083611,-3.8218385002,5.1127009785\C,0,-4.0077  
978481,-4.964941711,2.9850853684\H,0,-7.5628434691,-1.4827239918,3.536  
17525\H,0,-8.0200283889,-3.2058390311,3.5567235715\H,0,-6.4531426948,-  
2.6885010818,2.8720820448\H,0,-3.0476210281,-2.8853363266,5.6081440264  
\H,0,-2.4678176504,-4.5174890993,5.1933846295\H,0,-4.1645420996,-4.302  
7200277,5.6621481451\H,0,-3.5240007141,-5.0760393006,1.9977518249\H,0,  
-5.0980488662,-4.9741057826,2.7841889608\H,0,-3.7646243184,-5.85291958  
19,3.6008570185\H,0,-0.3083132942,-8.2329497434,2.1841705779\H,0,-1.39  
80463197,-7.9330128246,0.8008533825\H,0,-2.00889973,-7.8607343771,2.48  
0611368\H,0,0.5836093901,-5.9302543896,3.5326489118\H,0,-1.1074880188,  
-6.1001385601,4.0286434483\H,0,-0.5261856548,-4.5470330308,3.342344205  
8\\Version=ES64L-G16RevA.03\HF=-2638.4765317\RMSE=3.389e-09\Dipole=-0.  
8276754,1.1231187,2.075526\Quadrupole=3.2874369,-11.2123377,7.9249007,  
-7.5716287,-24.8385331,-10.8490368\PG=C01 [X(C37H50C12N2O1Ru1)]\@

### Reaction of allylsulfone carbene and 2,3-dimethyl-2-butene (4S)

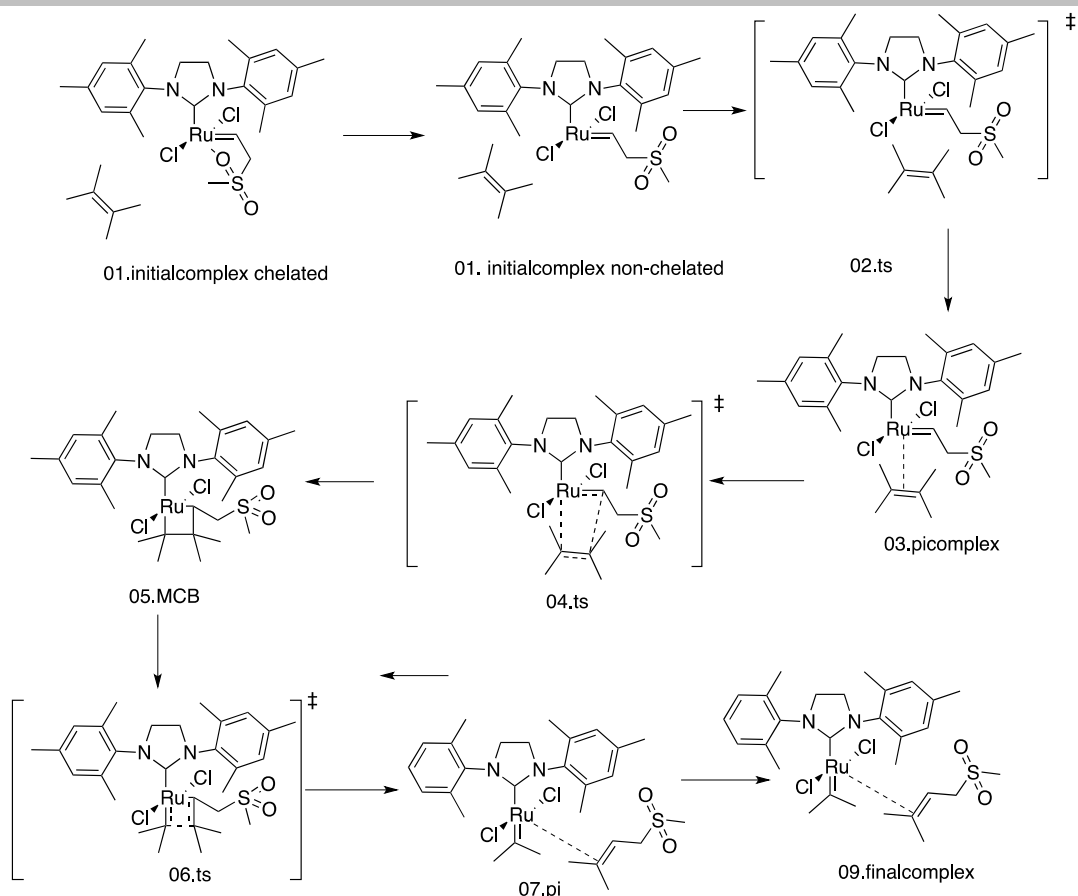

Scheme 4 Reaction of allylsulfonecarbene and 2,3-dimethyl-2-butene(4S) (tetrasubstituted alkene)

**01.initialcomplex**

```

1\1\GINC-JOKER-C7\Stability\RM06L\Gen\C30H44Cl2N2O2Ru1S1\RISHIRAM\24-S
ep-2017\0\#\#P M06L/chkbasis stable(opt) pop(nbo) scrf(check) guess(rea
d) geom(allcheck) nosym scf(fermi,xqc,maxcyc=200) int(grid=ultrafine)\
\Title\0,1\C,0,-4.7175000487,-1.593254722,6.9785524268\C,0,-5.7093662
265,-1.8596448376,6.013703627\C,0,-6.7017059773,-2.8358995308,6.227564
0965\C,0,-6.6222111994,-3.6135935311,7.3858256322\C,0,-5.601537038,-3.
4381595393,8.3262244809\C,0,-4.6731746034,-2.4096343245,8.1133917815\N
,0,-5.7364494871,-1.0753715249,4.8251628252\C,0,-4.9416445223,-1.22709
35964,3.734026297\N,0,-5.0913792239,-0.123882554,2.9595707836\C,0,-5.9
587164939,0.8842774995,3.5724644927\C,0,-6.5522798919,0.1400353413,4.7
594639888\Ru,0,-3.7633574682,-2.7084909284,3.2328224672\C,0,-4.6090240
437,-3.8824524931,4.3436220166\C,0,-1.4260345944,-4.5960671152,1.15801
56992\C,0,-4.4766839601,0.126603648,1.6957787977\C,0,-3.1486188655,0.5
947442413,1.6594695856\C,0,-2.5743844324,0.848641221,0.4098938576\C,0,
-3.2860792818,0.6738006323,-0.7822649602\C,0,-4.6189172346,0.258283745
7,-0.7006358691\C,0,-5.2403693984,-0.0128937214,0.5225483427\C,0,-2.38
48876304,0.8535938765,2.9220406987\C,0,-2.6272021888,0.8930327023,-2.1
086900073\C,0,-6.6856426366,-0.4000928946,0.5616565678\C,0,-7.80586220
44,-3.0598314454,5.2412045202\C,0,-5.4884392796,-4.3571204134,9.502599
0237\C,0,-3.7866202553,-0.4295453731,6.8354224088\C,0,-1.3505516459,-3
.3313225847,0.6671805167\Cl,0,-1.9071313408,-2.3411709491,4.7295305439
\Cl,0,-5.1784532369,-3.339283121,1.3728591816\H,0,-6.4774746151,0.7033
216479,5.7048493919\H,0,-7.6174436851,-0.1245446502,4.612529855\H,0,-5
.3634283107,1.7699327341,3.8684734203\H,0,-6.7203560223,1.2236564041,2
.8500031825\H,0,-1.535123624,1.2015811688,0.3692259509\H,0,-5.19944668
01,0.1342148951,-1.624420592\H,0,-3.8879663757,-2.233336126,8.86007956
92\H,0,-7.3628399563,-4.4077225899,7.5382378015\H,0,-1.3961268135,1.28

```

## SUPPORTING INFORMATION

86374278,2.7019469661\H,0,-2.9202921808,1.5628516031,3.5808480556\H,0,-2.2158888208,-0.0606738293,3.5219841098\H,0,-3.4620313225,-0.268710144,5.7953650251\H,0,-4.2770803796,0.5027401728,7.1786524322\H,0,-2.8803025821,-0.5630836255,7.4475727677\H,0,-8.7213633848,-2.511753164,5.535820563\H,0,-7.5397650971,-2.7174242921,4.2261792242\H,0,-8.0721111615,-4.1283843153,5.1862401721\H,0,-3.3536583702,1.1759339873,-2.8888250958\H,0,-1.8509703996,1.6753096283,-2.0595726738\H,0,-2.1264438846,-0.0299514074,-2.4588447897\H,0,-4.8116617966,-3.9588535226,10.2762437484\H,0,-6.4701337126,-4.5509798644,9.9681959848\H,0,-5.0898035982,-5.3408871631,9.1898028486\C,0,-0.7347996227,-5.0532447749,2.4105483249\C,0,-2.1840658736,-5.7113600381,0.5007291112\C,0,-4.3560012055,-7.2359575396,4.0740820118\S,0,-4.8020124848,-6.3609470944,5.5595316283\O,0,-4.1837651462,-7.0337549719,6.7089418368\O,0,-6.2572923029,-6.1574292712,5.5349278176\C,0,-3.9748431452,-4.761743822,5.3558461424\H,0,-3.2638870678,-7.368191303,4.0379797697\H,0,-4.7206106395,-6.6727023801,3.1997822983\H,0,-4.8568221264,-8.2150211178,4.1297488184\H,0,-5.7036233594,-4.0300329858,4.2519364066\H,0,-2.9004452601,-4.9619437861,5.208161973\H,0,-4.0755647531,-4.2959036586,6.3618968823\C,0,-0.5750042199,-2.222437941,1.3168212993\H,0,0.02338078,-2.5250083079,2.1877381508\H,0,-1.258408258,-1.4182260915,1.6560095071\H,0,0.1061990779,-1.7447847224,0.5845995525\C,0,-2.0370137235,-2.8705072516,-0.5842223568\H,0,0.0497706423,-5.8016224317,2.1788364217\H,0,-1.4478936022,-5.5741139049,3.0798469083\H,0,-0.2743183984,-4.2486535769,3.0008918002\H,0,-2.6894927633,-5.4356533108,-0.4359208903\H,0,-2.9582409842,-6.1159188899,1.1814282953\H,0,-1.508435664,-6.5608855024,0.2774651992\H,0,-2.6488294517,-3.6359945629,-1.0827993281\H,0,-1.295979039,-2.4994238955,-1.3205855971\H,0,-2.7032526332,-2.0127757014,-0.3671016412\H,0,-6.94691018,-1.0447230459,-0.2937998131\H,0,-7.337360705,0.4930147457,0.4987466736\H,0,-6.9490727067,-0.9468195456,1.4808720559\Version=ES64L-G09RevE.01\HF=-2841.5219399\RMSD=3.902e-09\Dipole=-0.7432293,2.6889068,-0.539836\Quadrupole=15.2674194,-11.7345803,-3.5328391,-28.6137358,-7.9661419,27.8525065\FG=C01 [X(C30H44Cl2N2O2Ru1S1)]\@

### 02.ts

l\l\GINC-JOKER-C3\Stability\RM06L\Gen\C30H44Cl2N2O2Ru1S1\RISHIRAM\02-Jul-2017\0\#\#P M06L/chkbasis stable(opt) pop(nbo) scrf(check) guess(read) geom(allcheck) nosym scf(fermi,xqc,maxcyc=200) int(grid=ultrafine)\Title\0,1\C,0,-4.7572216642,-1.5510229395,6.9394694393\C,0,-5.7487625111,-1.8740456518,5.9915570317\C,0,-6.7059086413,-2.8765153268,6.2392029922\C,0,-6.5880060761,-3.6230494554,7.4148846268\C,0,-5.5627439879,-3.3927415705,8.3383138338\C,0,-4.6722992054,-2.3383583192,8.0918674597\N,0,-5.8073255343,-1.120705415,4.7841554539\C,0,-4.9880249641,-1.2552255055,3.7083938403\N,0,-5.1644503259,-0.1675910011,2.9176315847\C,0,-6.0707379802,0.8188464896,3.5095812204\C,0,-6.6700425548,0.059954968,4.6839852852\Ru,0,-3.7640382045,-2.7075099823,3.2356912075\C,0,-4.584937235,-3.8892980844,4.3572529671\C,0,-1.4004443713,-4.5747103551,1.1698946004\C,0,-4.5258668174,0.0950905692,1.6681492694\C,0,-3.205991952,0.5876865449,1.6620896902\C,0,-2.6086946347,0.8521493661,0.4253001705\C,0,-3.2892368952,0.6641943702,-0.7826693288\C,0,-4.6156297158,0.223657177,-0.7312336301\C,0,-5.2594912171,-0.059259919,0.4774563318\C,0,-2.4743868899,0.8662475092,2.9392268345\C,0,-2.6048621882,0.8966422589,-2.0938132268\C,0,-6.6973963221,-0.4746872632,0.4832241479\C,0,-7.8118247928,-3.1584289409,5.2700054024\C,0,-5.4053131877,-4.2814623356,9.532685283\C,0,-3.8706560619,-0.3589647458,6.756216407\C,0,-1.3411064376,-3.3103070056,0.6762080933\C1,0,-1.9160314204,-2.295449974,4.7333956358\C1,0,-5.1614909812,-3.3813152116,1.3800279066\H,0,-6.6484742228,0.6325129034,5.6261995499\H,0,-7.718216071,-0.2492535028,4.5051759448\H,0,-5.5042780536,1.7192986475,3.8180765239\H,0,-6.825070579,1.138486875,2.7709713636\H,0,-1.576171072,1.2260899131,0.4082257311\H,0,-5.172559457,0.0887527693,-1.6679278243\H,0,-3.886105782,-2.1179002975,8.8256549237\H,0,-7.3002657367,-4.4372323989,7.5942872075\H,0,-1.5125530314,1.36659

## SUPPORTING INFORMATION

84759,2.7393626228\H,0,-3.0597358887,1.52540822,3.6069814689\H,0,-2.25  
2564548,-0.0484620837,3.5212870987\H,0,-3.5171061592,-0.2471646136,5.7  
191029744\H,0,-4.4096856222,0.5710007858,7.024926138\H,0,-2.9810782417  
, -0.4179646961,7.4035369488\H,0,-8.7390275661,-2.6259411504,5.55662672  
88\H,0,-7.563028325,-2.837712087,4.2434574841\H,0,-8.0497179186,-4.234  
6250685,5.2472581299\H,0,-1.8410796929,1.6896536577,-2.0256580617\H,0,  
-2.0837795471,-0.018241342,-2.4354340755\H,0,-3.3181499884,1.171584446  
9,-2.8888254477\H,0,-4.7251971889,-3.8488900525,10.2846409791\H,0,-6.3  
732634042,-4.4891347301,10.0206866248\H,0,-4.9877969907,-5.261912664,9  
.2343003891\C,0,-0.7113016074,-5.0167561409,2.4290824204\C,0,-2.134516  
1774,-5.7040291341,0.5096291543\C,0,-4.2795912679,-7.2461147289,4.1408  
012218\S,0,-4.7276910117,-6.3532626774,5.6149247869\O,0,-4.0883601133,  
-6.9947102356,6.7706988687\O,0,-6.1866569691,-6.1775658872,5.597872003  
9\C,0,-3.932236282,-4.7418549128,5.3806039624\H,0,-3.1860129759,-7.361  
0742193,4.094299137\H,0,-4.6642148422,-6.7052997283,3.2610116103\H,0,-  
4.7629469539,-8.2323289681,4.2195262163\H,0,-5.6764853522,-4.060005852  
,4.2675402503\H,0,-2.8542106507,-4.9227460408,5.2340548146\H,0,-4.0397  
700626,-4.261742737,6.379384524\C,0,-0.5842664775,-2.1884632673,1.3259  
432949\H,0,0.0146250016,-2.4794221875,2.2004396583\H,0,-1.2801441907,-  
1.3923865357,1.658976119\H,0,0.0932976147,-1.7038518941,0.5948686767\C  
,0,-2.0274177832,-2.8626750441,-0.5798697187\H,0,0.0853078807,-5.75506  
13925,2.206318168\H,0,-1.4212976256,-5.5445732149,3.0962914195\H,0,-0.  
2660307234,-4.2031048292,3.0187323277\H,0,-2.6405908536,-5.4379205727,  
-0.4294196814\H,0,-2.9037513715,-6.1235394402,1.1866966094\H,0,-1.4415  
767478,-6.5403086158,0.289362031\H,0,-2.6310958662,-3.6358200597,-1.07  
63919438\H,0,-1.2874878134,-2.4888086449,-1.3159776527\H,0,-2.70149240  
65,-2.0097227233,-0.3685681243\H,0,-6.9273248634,-1.119470787,-0.38118  
18773\H,0,-7.3652212885,0.4056737496,0.4104735726\H,0,-6.9696903622,-1  
.0315455368,1.3936741978\\Version=ES64L-G09RevE.01\HF=-2841.5217527\RM  
SD=2.458e-09\Dipole=-0.8230433,2.6426317,-0.6136033\Quadrupole=16.9959  
503,-11.7460221,-5.2499282,-28.0344376,-7.9427059,27.4876141\PG=C01 [X  
(C30H44Cl2N2O2Ru1S1)]\@

### 03.pi

```
l\l\GINC-JOKER-C7\Stability\RM06L\Gen\C30H44Cl2N2O2Ru1S1\RISHIRAM\07-J  
un-2017\0\#\#P M06L/chkbasis stable(opt) pop(nbo) scrf(check) guess(rea  
d) geom(allcheck) nosym scf(fermi,xqc,maxcyc=200) int(grid=ultrafine)\  
\Title\0,1\C,0,-4.7338726504,-1.7073834813,6.9081645932\C,0,-5.599051  
0837,-1.9672208745,5.8299465467\C,0,-6.5245231157,-3.0275950419,5.8610  
980776\C,0,-6.5365642997,-3.8545733475,6.9881656075\C,0,-5.6733698187,  
-3.6487078122,8.0707968041\C,0,-4.7809267378,-2.5718532087,8.008462782  
6\N,0,-5.5806925686,-1.082951308,4.7155465835\C,0,-4.8459822419,-1.202  
3344943,3.5924156988\N,0,-4.9935476281,-0.0611406987,2.8764772743\C,0,  
-5.7987783992,0.9435146323,3.5765241465\C,0,-6.3637355437,0.1563605627  
,4.7488676777\Ru,0,-3.6926601117,-2.6892602392,2.9043358486\C,0,-4.328  
7264271,-4.0326406322,3.9723522016\C,0,-2.0786994143,-4.5024362667,1.6  
187464736\C,0,-4.4078718565,0.2313396948,1.6066494281\C,0,-3.073477874  
,0.6826448857,1.5535783874\C,0,-2.5202406704,0.9582524492,0.2989392341  
\C,0,-3.257810901,0.8209147056,-0.8823892086\C,0,-4.599282432,0.437677  
8938,-0.7817733878\C,0,-5.2025449718,0.1511547327,0.4475158707\C,0,-2.  
285446803,0.9172799346,2.8048062804\C,0,-2.6198012039,1.0500620718,-2.  
2171585054\C,0,-6.6630747538,-0.1678799007,0.5108045382\C,0,-7.4899575  
696,-3.2510819245,4.7384048648\C,0,-5.7045692221,-4.5679095568,9.25111  
68744\C,0,-3.8313922548,-0.5126296029,6.9230164066\C,0,-1.8565162379,-  
3.2488852794,1.0923135083\C1,0,-1.9256356482,-2.1938630879,4.542971010  
2\C1,0,-5.4877487151,-3.2176849285,1.3150260209\H,0,-6.234794462,0.666  
9989005,5.7180926759\H,0,-7.4399135798,-0.0766431297,4.6346521362\H,0,  
-5.1604068538,1.7917202405,3.8912341529\H,0,-6.5783757432,1.3450969066  
,2.9071627196\H,0,-1.4771660873,1.2978671002,0.2457723901\H,0,-5.20342  
9495,0.3560863799,-1.6950249773\H,0,-4.103632991,-2.3875523332,8.85280  
83444\H,0,-7.2397632265,-4.6953595465,7.0155920838\H,0,-1.261521574,1.  
2514398753,2.5689331641\H,0,-2.7504344188,1.7046966081,3.4281462191\H,
```

## SUPPORTING INFORMATION

0,-2.2064339596,0.0167570915,3.4415418018\H,0,-3.5253893099,-0.2023694539,5.9112873953\H,0,-4.3295380308,0.3512618202,7.4052726778\H,0,-2.9140656378,-0.7134565769,7.5003037314\H,0,-8.4114448226,-2.6535289904,4.8805425823\H,0,-7.068975418,-2.9697060755,3.7569225307\H,0,-7.7940212867,-4.3095590753,4.6889791398\H,0,-3.3517292892,1.3771676432,-2.9745249152\H,0,-1.8149207053,1.8026149928,-2.1661495563\H,0,-2.1598866675,0.1188308276,-2.6003482637\H,0,-5.0932864223,-4.1872542334,10.0859662133\H,0,-6.7340550701,-4.7179350009,9.6217679363\H,0,-5.314381856,-5.5633788091,8.9726799929\C,0,-1.1655113242,-5.0796823983,2.665053989\C,0,-3.005915719,-5.5056710064,0.9986683274\C,0,-3.5681733968,-7.4807583932,4.6612755918\S,0,-4.4285313858,-6.2685384662,5.6427794667\O,0,-4.0617335516,-6.5010418273,7.0469347502\O,0,-5.8418939144,-6.3142386315,5.2395557954\C,0,-3.6933378062,-4.6760268758,5.1530221621\H,0,-2.496095852,-7.4701592829,4.9082661427\H,0,-3.73969887,-7.2847624213,3.5919020979\H,0,-4.0095156743,-8.4515260284,4.9363134912\H,0,-5.312658359,-4.4686544819,3.6921564189\H,0,-2.6045810409,-4.8350665821,5.0627227908\H,0,-3.8193830197,-4.0492067342,6.061165565\C,0,-0.6818004484,-2.4049517203,1.4951355475\H,0,-0.2291698568,-2.6818628587,2.4556456024\H,0,-0.9555787528,-1.3345045423,1.5462093825\H,0,0.0964715099,-2.4877134676,0.7092156969\C,0,-2.5537077106,-2.7064064103,-0.1217795288\H,0,-0.2129617211,-5.4094269307,2.2046860658\H,0,-1.6082772646,-5.9769225578,3.130753168\H,0,-0.9127546801,-4.3646601733,3.465619209\H,0,-2.4013884334,-6.2711343029,0.4708659119\H,0,-3.7243707788,-5.0802037817,0.2869507362\H,0,-3.5912767835,-6.0471815903,1.7616307212\H,0,-3.3340473755,-3.3581867637,-0.534477176\H,0,-1.8017621725,-2.50990974,-0.9121855131\H,0,-3.0253163335,-1.7286187001,0.0943592999\H,0,-6.9803286978,-0.7564981499,-0.3657220163\H,0,-7.2661780531,0.7611771079,0.5083928799\H,0,-6.9269944715,-0.7453073274,1.4100746103\\Version=ES64L-G09RevE.01\HF=-2841.5291761\RMSD=2.429e-09\Dipole=0.6216323,2.0357119,-1.1839871\Quadrupole=0.186859,6.2070764,-6.3939354,-35.6197736,1.7726604,24.1794682\PG=C01 [XC30H44C12N2O2Ru1S1)]\@

### 04.ts

I\1\GINC-JOKER-C8\Stability\RM06L\Gen\C30H44C12N2O2Ru1S1\RISHIRAM\06-Jun-2017\0\#\#P M06L/chkbasis stable(opt) pop(nbo) scrf(check) guess(read) geom(allcheck) nosym scf(fermi,xqc,maxcyc=200) int(grid=ultrafine)\Title\0,1\C,0,-4.7417412938,-1.5920697187,6.9186920776\C,0,-5.5469956513,-1.894827541,5.8071005285\C,0,-6.3837251311,-3.0277487588,5.7869145079\C,0,-6.3684997935,-3.8758533257,6.8977372132\C,0,-5.5631315594,-3.621338654,8.0157372678\C,0,-4.7588474159,-2.4783122506,8.0026029465\N,0,-5.5694267382,-0.9795710418,4.7099438425\C,0,-4.8540578305,-1.0579603094,3.577510849\N,0,-5.0272397038,0.0762365442,2.8744414256\C,0,-5.8552666566,1.0570292939,3.5861244253\C,0,-6.3530508813,0.2619285401,4.787226084\Ru,0,-3.7061355492,-2.6284251644,2.9219255282\C,0,-3.9669548404,-4.3605010646,3.577686714\C,0,-2.4204942562,-4.4732920174,2.0619843966\C,0,-4.440029466,0.3550193831,1.6018730123\C,0,-3.0826382234,0.7253897109,1.542511911\C,0,-2.5178501484,0.9539135891,0.2833729209\C,0,-3.2657918562,0.8482333499,-0.8946190605\C,0,-4.6263452677,0.541163705,-0.7872025573\C,0,-5.2403815656,0.2990403548,0.445869044\C,0,-2.2769726079,0.9209565021,2.790004945\C,0,-2.6211682023,1.0339367596,-2.2332515793\C,0,-6.7111513014,0.0325393215,0.5170612279\C,0,-7.263747356,-3.3138018689,4.6123616861\C,0,-5.5658794612,-4.5581857515,9.1826850108\C,0,-3.9234531265,-0.3399025914,6.9849772507\C,0,-2.221221656,-3.1618066512,1.4412288439\C1,0,-2.094464791,-2.1461365348,4.7328981202\C1,0,-5.5639102452,-3.0617853451,1.3519620485\H,0,-6.169521192,0.7692953302,5.7494780858\H,0,-7.4326951016,0.0276754139,4.7353808417\H,0,-5.2431194366,1.9344316716,3.8689043363\H,0,-6.6713823164,1.4167972195,2.9368963494\H,0,-1.4577904332,1.2348823232,0.2242543664\H,0,-5.2357304515,0.4805750576,-1.6985642558\H,0,-4.1254851783,-2.2577762726,8.8720628345\H,0,-7.0040985064,-4.7697861348,6.8859458852\H,0,-1.2703605528,1.3026871525,2.5520659154\H,0,-2.7574721485,1.6511417495,3.4679332807\H,0,-2.1510619117,-0.0073323599,3.3783850228\H,0,-3.6470909181,0.0368905657,5.98



## SUPPORTING INFORMATION

68259408\H,0,-4.4714979766,0.4657475315,7.5118135006\H,0,-2.989202571,-0.5059782981,7.5463700322\H,0,-7.9022950878,-2.4467676012,4.3595839978\H,0,-6.6805933483,-3.534245876,3.6990238734\H,0,-7.9190812728,-4.1769993768,4.8096376813\H,0,-3.3333396588,1.4120604796,-2.9857203196\H,0,-1.7662981286,1.7293891438,-2.1862664136\H,0,-2.2291427857,0.0738877745,-2.620631308\H,0,-5.0083398248,-4.1485776661,10.0412630813\H,0,-6.5933724491,-4.7833195049,9.5199715342\H,0,-5.1043901993,-5.5222620472,8.9040438867\C,0,-1.2783101333,-5.0130029796,2.8850400284\C,0,-3.1053636962,-5.5185554384,1.2110803956\C,0,-3.5334870219,-7.689908711,4.5988352262\S,0,-4.4145535608,-6.3844992028,5.4305712671\O,0,-4.189748395,-6.551497018,6.8723285083\O,0,-5.7861054135,-6.3710176083,4.9013437283\C,0,-3.5845641238,-4.8520332195,4.934182404\H,0,-2.4850829927,-7.7044728959,4.9323290175\H,0,-3.6099689553,-7.5618831823,3.5085073997\H,0,-4.0366346639,-8.6231883683,4.896771343\H,0,-4.7156677739,-4.9831374526,3.0472301202\H,0,-2.5011280563,-4.9891260132,5.0939457655\H,0,-3.8973910739,-4.1400978136,5.7219622012\C,0,-0.9270871378,-2.4205877577,1.6936299963\H,0,-0.5522609368,-2.4859366474,2.7219438408\H,0,-1.0402752776,-1.3507223085,1.4402514934\H,0,-0.1488998132,-2.8232129574,1.011718599\C,0,-2.6742725667,-2.9348013421,0.0179237983\H,0,-0.3998710276,-5.1575095885,2.2267057304\H,0,-1.5137473907,-5.9998094212,3.3188516701\H,0,-0.9734527929,-4.3319418329,3.6957771097\H,0,-2.475154767,-5.7344259484,0.3267530135\H,0,-4.0926479744,-5.1909304564,0.8502265515\H,0,-3.2337226367,-6.4693013851,1.7542966792\H,0,-3.599393167,-3.4522850298,-0.2584656985\H,0,-1.8659564709,-3.2683413814,-0.6665030938\H,0,-2.8250647436,-1.8560577479,-0.1709783669\H,0,-7.061222258,-0.503903936,-0.3803137127\H,0,-7.2834273958,0.9795305557,0.5665830559\H,0,-6.9821447571,-0.5763066521,1.3939731487\\Version=ES64L-G09RevE.01\HF=-2841.5180648\RMS D=9.233e-09\Dipole=1.0690458,1.6025075,-1.2996794\Quadrupole=-6.8694116,15.5088905,-8.6394789,-37.0983822,6.8508205,22.3429043\PG=C01 [X(C30H44Cl2N2O2Ru1S1)]\@

### 05.MCB

1\1\GINC-C01\Stability\RM06L\Gen\C30H44Cl2N2O2Ru1S1\RISHIRAMT\23-May-2017\0\#\#P M06L/chkbasis stable(opt) pop(nbo) scrf(check) guess(read) geom(allcheck) nosym scf(fermi,xqc,maxcyc=200) int(grid=ultrafine)\Tit le\0,1\C,0,-4.7745743348,-1.5346449206,6.9191290924\C,0,-5.5617095784,-1.8498110537,5.7950371704\C,0,-6.3612092516,-3.0085566073,5.7568651389\C,0,-6.3183572269,-3.872975871,6.8569804221\C,0,-5.5265187022,-3.6088449503,7.9799064661\C,0,-4.7667375051,-2.4341547261,7.9892751913\N,0,-5.5840432843,-0.9234986673,4.7052725114\C,0,-4.8623101893,-0.9962829738,3.5779899951\N,0,-5.0169543575,0.1336211855,2.8720285293\C,0,-5.8348937316,1.1209055291,3.5888085317\C,0,-6.3796216615,0.3116828962,4.760674213\Ru,0,-3.7615314329,-2.5946144583,2.99207794\C,0,-3.8010478651,-4.5132033258,3.4466432854\C,0,-2.6487159197,-4.5165189784,2.3374614654\C,0,-4.4309525848,0.3895207339,1.5943974116\C,0,-3.0673462617,0.7356507369,1.5245749527\C,0,-2.5065253574,0.9407688304,0.2598730185\C,0,-3.2633435697,0.8355165686,-0.9130028406\C,0,-4.6273122039,0.5496805856,-0.7951464611\C,0,-5.2383409096,0.3307375967,0.4440401745\C,0,-2.25101528,0.9269542656,2.7658102882\C,0,-2.6238852257,1.0003010006,-2.2568667841\C,0,-6.7125962145,0.0864898434,0.5260190809\C,0,-7.2235075557,-3.3395967099,4.5813350647\C,0,-5.4940778212,-4.5664776096,9.1294150359\C,0,-3.9908033514,-0.2614956448,7.0004893775\C,0,-2.3794862205,-3.0464633788,1.6039588863\C1,0,-2.1523651349,-2.1263766252,4.8013760985\C1,0,-5.6363724868,-3.0309404521,1.4580092398\H,0,-6.2437081954,0.8110269887,5.734285624\H,0,-7.453814306,0.0676475138,4.6570131248\H,0,-5.2051238561,1.9739480019,3.9054283988\H,0,-6.626182931,1.5163103983,2.9305899459\H,0,-1.4424150671,1.2036903659,0.1915986483\H,0,-5.2427257651,0.4884870242,-1.7023542965\H,0,-4.1445555827,-2.2050113418,8.8643954029\H,0,-6.9233187096,-4.7880550795,6.8291621322\H,0,-1.2339117399,1.2728268932,2.5183677011\H,0,-2.7049087736,1.6834324621,3.4331369926\H,0,-2.1517745573,0.0051334804,3.3689169371\H,0,-3.685838741,0.1099793377,6.0083649371\H,0,-4.576653095,0.5381536718,7.4946507853\H,0,-3.0751085118,-

## SUPPORTING INFORMATION

0.39845677,7.5989782951\H,0,-7.5544666512,-2.4427149791,4.0321753544\H,0,-6.6851387822,-3.9652812845,3.8468370761\H,0,-8.1135792355,-3.9095397903,4.8967591059\H,0,-3.3373826053,1.3737634389,-3.010324892\H,0,-1.7645660185,1.6909770151,-2.2224532051\H,0,-2.2395198936,0.0333034077,-2.634260323\H,0,-4.9430068729,-4.1568015055,9.9919974431\H,0,-6.5121372509,-4.8283655305,9.4685824483\H,0,-5.0072999504,-5.5115833015,8.8294779998\C,0,-1.3323793152,-5.0005817352,2.9410047745\C,0,-3.1186163959,-5.4922791378,1.2532949301\C,0,-3.450998112,-7.7798697111,4.5343969681\S,0,-4.3547224622,-6.477352326,5.3461274064\O,0,-4.1586629325,-6.6384215231,6.7933742703\O,0,-5.7196313362,-6.4726493893,4.7971342845\C,0,-3.5392814324,-4.9347158142,4.8683579036\H,0,-2.4093208885,-7.785802313,4.8887974055\H,0,-3.5063228575,-7.6527536256,3.4426426198\H,0,-3.9528533388,-8.7165337037,4.8238068411\H,0,-4.712041331,-4.9892841467,3.0415873703\H,0,-2.482431675,-5.0156414126,5.1645176455\H,0,-4.0015902167,-4.2326841247,5.5876282653\C,0,-0.9986135696,-2.4562001077,1.79262069\H,0,-0.6227375672,-2.4684471312,2.8217823268\H,0,-1.0159555017,-1.4039625001,1.4527523695\H,0,-0.270563973,-2.9768616527,1.1376025207\C,0,-2.7388687025,-2.9517797972,0.138265523\H,0,-0.5467380401,-5.0434160605,2.1681053885\H,0,-1.4511864141,-6.0251940063,3.3363252215\H,0,-0.9775322824,-4.3544706511,3.7585268367\H,0,-2.400061755,-5.5389766526,0.4174363473\H,0,-4.1090117855,-5.2194613016,0.8582043432\H,0,-3.1938262804,-6.5083950377,1.6779599291\H,0,-3.6984761032,-3.4003764272,-0.1377521575\H,0,-1.9365335218,-3.4039188538,-0.4798513809\H,0,-2.7827304603,-1.8823778488,-0.1408291473\H,0,-7.0742879958,-0.4607197884,-0.3601357937\H,0,-7.2710619525,1.0423179674,0.5603452155\H,0,-6.9902094896,-0.5021144238,1.4147329506\\Version=ES64L-G09RevE.01\HF=-2841.5274963\RMSD=3.731e-09\Dipole=0.8800397,1.9268235,-1.2674842\Quadrupole=-4.1574038,11.8053983,-7.6479945,-38.9141599,5.3775424,24.4584992\PG=C01 [X(C30H44C12N2O2Ru1S1)]\@

### 06ts

1\1\GINC-JOKER-C8\Stability\RM06L\Gen\C30H44C12N2O2Ru1S1\RISHIRAM\06-Jun-2017\0\#\#P M06L/chkbasis stable(opt) pop(nbo) scrf(check) guess(read) geom(allcheck) nosym scf(fermi,xqc,maxcyc=200) int(grid=ultrafine)\Title\0,1\C,0,-4.7743289867,-1.4639232925,6.940749699\C,0,-5.5684055153,-1.8048899581,5.8290439921\C,0,-6.3563381264,-2.9715782057,5.8190302019\C,0,-6.2900096259,-3.820766896,6.9298975957\C,0,-5.4850715587,-3.533774624,8.0372790899\C,0,-4.7455954493,-2.3459424456,8.0244723575\N,0,-5.5861268912,-0.9139939732,4.7109677775\C,0,-4.8722090889,-1.0371880204,3.5803008681\N,0,-5.0371946078,0.0689763369,2.8367932617\C,0,-5.8433924099,1.0857469197,3.5255964642\C,0,-6.3813451726,0.3213238675,4.7284904716\Ru,0,-3.789986968,-2.6944636171,3.0163258619\C,0,-3.7773988166,-4.7066972709,3.416936673\C,0,-2.6827004269,-4.6822343881,2.4177050232\C,0,-4.4263537907,0.3205748594,1.5715167253\C,0,-3.0631671296,0.6733862632,1.5311110921\C,0,-2.483131085,0.9186826337,0.2828022129\C,0,-3.2202718895,0.8409288558,-0.9054351159\C,0,-4.5816382037,0.5340815716,-0.8176712273\C,0,-5.2114512371,0.2786050369,0.4061389437\C,0,-2.2672497235,0.8179531933,2.7906984941\C,0,-2.5607659204,1.0511858485,-2.2332400788\C,0,-6.6842166617,0.0174443813,0.4555953944\C,0,-7.224723021,-3.3356514795,4.6572058718\C,0,-5.4139067836,-4.4850962614,9.1909649987\C,0,-3.9882493103,-0.1908100665,6.9840931323\C,0,-2.4685237646,-2.814106271,1.6139182385\C1,0,-2.194607408,-2.2302496387,4.8532512566\C1,0,-5.6798415803,-3.1324265485,1.4953648456\H,0,-6.2413964565,0.8560203176,5.6827011185\H,0,-7.456121408,0.073592652,4.6390440684\H,0,-5.2047638958,1.9449937916,3.8070494283\H,0,-6.6379253125,1.4642774947,2.8610882609\H,0,-1.4197847438,1.1902210204,0.2391608584\H,0,-5.1810861387,0.4878050728,-1.7364350499\H,0,-4.1128564546,-2.0991296589,8.8871376051\H,0,-6.8823301735,-4.7446765143,6.9201674766\H,0,-1.2436770508,1.1661326694,2.5746878747\H,0,-2.7288409524,1.5512357618,3.4784384735\H,0,-2.1888506102,-0.1285119307,3.3587964301\H,0,-3.6828089917,0.1456125485,5.9798017111\H,0,-4.5712645976,0.6275795064,7.4499528787\H,0,-3.0731678793,-0.3117160567,7.5869298973\H,0,-7.5335521736,-2.4586583602,4.06532

## SUPPORTING INFORMATION

63858\H,0,-6.7025013962,-4.0121347669,3.956618494\H,0,-8.1288378117,-3.8686848579,4.9971426082\H,0,-3.2696101541,1.4236599437,-2.9915154026\H,0,-1.7200125771,1.7622354021,-2.1675292134\H,0,-2.1445898709,0.1031194774,-2.6245899888\H,0,-4.8364401509,-4.0697172585,10.0332653518\H,0,-6.4197268178,-4.7475249545,9.5646894723\H,0,-4.9354403572,-5.4325326906,8.8834420652\C,0,-1.299716485,-4.9902941108,2.9459928417\C,0,-3.0203933045,-5.4758524886,1.1705160767\C,0,-3.5669715662,-7.8750530454,4.4789388022\S,0,-4.4169877435,-6.5772583668,5.3536730868\O,0,-4.184672473,-6.7665795986,6.7919124083\O,0,-5.7971458968,-6.5268340686,4.8473617359\C,0,-3.5760074167,-5.0536387825,4.8671113724\H,0,-2.5155419998,-7.9108573028,4.8014002625\H,0,-3.6516964384,-7.7052306588,3.3944125196\H,0,-4.0785608939,-8.8116434735,4.7502767864\H,0,-4.7257510277,-5.1063261899,3.0173420404\H,0,-2.5275232427,-5.1413836377,5.1921316651\H,0,-4.055739516,-4.3283751514,5.5511445977\C,0,-1.0538880086,-2.3482775574,1.8078656445\H,0,-0.6973787762,-2.3620498984,2.8444726718\H,0,-1.0003299944,-1.303661779,1.4418272151\H,0,-0.3597313589,-2.9247682188,1.1649214366\C,0,-2.836666489,-2.7861831485,0.1583265966\H,0,-0.5365005021,-4.9218584495,2.1542501871\H,0,-1.2792787233,-6.03474728,3.3127820398\H,0,-1.0051786168,-4.3317422096,3.7777639447\H,0,-2.2889814122,-5.324125067,0.3594201359\H,0,-4.0298079586,-5.2432075312,0.7963755183\H,0,-2.9970856233,-6.5524543146,1.4247373393\H,0,-3.7576765569,-3.3183140139,-0.1006012895\H,0,-1.9999111077,-3.145311496,-0.4729839563\H,0,-2.9998438435,-1.7238606733,-0.1108792668\H,0,-7.0197564788,-0.5355594472,-0.4374168867\H,0,-7.2544932407,0.9666701866,0.4747186615\H,0,-6.9735361767,-0.5722016467,1.3394568871\Version=ES64L-G09RevE.01\HF=-2841.5249093\RMSD=4.304e-09\Dipole=1.0696691,1.9355331,-1.5644635\Quadrupole=-4.7463599,13.7155325,-8.9691725,-39.4959851,8.3094998,26.438093\PG=C01 [X(C30H44C12N2O2Ru1S1)]\@

### 07.pi

1\1\GINC-JOKER-C10\Stability\RM06L\Gen\C30H44C12N2O2Ru1S1\RISHIRAM\07-Jun-2017\0\#\#P M06L/chkbasis stable(opt) pop(nbo) scrf(check) guess(re ad) geom(allcheck) nosym scf(fermi,xqc,maxcyc=200) int(grid=ultrafine)\Title\0,1\C,0,-4.6861834022,-1.4866856045,6.6983105436\C,0,-5.551665822,-1.8862274373,5.6569728187\C,0,-6.3773127452,-3.0189345599,5.7912722246\C,0,-6.2612696693,-3.785400499,6.9595379723\C,0,-5.3836174656,-3.443208475,7.9915596703\C,0,-4.6139135745,-2.2824690864,7.8426406915\N,0,-5.6201018277,-1.0514118312,4.4958241685\C,0,-4.8495525871,-1.143134643,3.3786833149\N,0,-5.0328093761,-0.0107450616,2.6613531886\C,0,-5.8635473951,0.9698729201,3.3731012056\C,0,-6.4670557577,0.1430724329,4.4931752558\Ru,0,-3.8835600066,-2.8546822191,3.0343902886\C,0,-3.7069614214,-5.2483615133,3.5557553058\C,0,-2.6691855749,-5.3427827515,2.6603029847\C,0,-4.348213972,0.4011671838,1.4812472559\C,0,-3.0093183646,0.8243934001,1.5667979335\C,0,-2.3827681017,1.2653571855,0.395971125\C,0,-3.0553443841,1.3241284365,-0.8301264415\C,0,-4.3970471556,0.9272968505,-0.8661714581\C,0,-5.0616184754,0.4589594728,0.2706938766\C,0,-2.2804878867,0.8206028991,2.8734744462\C,0,-2.3509281282,1.7691795682,-2.0747847536\C,0,-6.4781013235,-0.0180499476,0.1931829688\C,0,-7.3865608943,-3.4145461546,4.7599041475\C,0,-5.2697073903,-4.2991781487,9.2141066475\C,0,-3.8921904112,-0.2216098356,6.602834678\C,0,-2.8756984679,-2.43640765,1.5220056661\C1,0,-2.1391651416,-2.4174063746,4.7207292543\C1,0,-5.8421099748,-3.5749551299,1.7123689952\H,0,-6.4354721671,0.6466360838,5.4737017645\H,0,-7.5196849536,-0.1417217708,4.297898595\H,0,-5.2267905535,1.7981081636,3.7428378456\H,0,-6.6184850518,1.407464893,2.7000640111\H,0,-1.33501739,1.5903178833,0.449849015\H,0,-4.9423191651,0.9645204266,-1.8185206444\H,0,-3.9315880025,-1.9849260966,8.6496865446\H,0,-6.8857323672,-4.6831281804,7.0598801316\H,0,-1.2459160986,1.1823861014,2.7528045152\H,0,-2.7736038193,1.4779224524,3.6144603382\H,0,-2.2386610182,-0.1866107983,3.3304325685\H,0,-3.5079059978,-0.0491616023,5.584460036\H,0,-4.5027775645,0.6591290879,6.8835923553\H,0,-3.0280852558,-0.2426512897,7.2867342186\H,0,-7.4199922566,-2.7211980233,3.9075925884\H,0,-7.1647862599,-4.4165828579,4.351423894\H,0,-8.3943733429,-

## SUPPORTING INFORMATION

3.4718442218,5.2107863897\H,0,-3.0393723597,2.2578829166,-2.7845871935  
\H,0,-1.5286501867,2.4703682864,-1.8541367\H,0,-1.9020718483,0.9104168  
296,-2.6093165344\H,0,-4.7001562186,-3.7992967788,10.0150268617\H,0,-6  
.2623781359,-4.5680900743,9.6163825703\H,0,-4.7592711936,-5.2494407448  
,8.9743485237\C,0,-1.2369271617,-5.3697327514,3.086571033\C,0,-2.93794  
07356,-5.6636936,1.2261532096\C,0,-3.499800546,-8.1515453591,4.9896875  
764\S,0,-4.3889199469,-6.7835850422,5.7070578512\O,0,-4.1680075942,-6.  
8032367656,7.1590496156\O,0,-5.7637202144,-6.814935678,5.1868892466\C,  
0,-3.5685395046,-5.3149779984,5.0408081754\H,0,-2.4514405246,-8.123651  
5325,5.3237249975\H,0,-3.5728040572,-8.1037623168,3.8917912729\H,0,-3.  
9928268839,-9.0630878198,5.3614622045\H,0,-4.7242411945,-5.4181756634,  
3.1750400014\H,0,-2.5317290706,-5.3303183128,5.4108196171\H,0,-4.09754  
30729,-4.5078294782,5.5816640215\C,0,-1.3795043551,-2.3757145801,1.542  
7532459\H,0,-0.922508523,-2.6470163885,2.503101519\H,0,-1.0697889618,-  
1.3381978851,1.2965366966\H,0,-0.9558254215,-3.0047307926,0.7320463184  
\C,0,-3.4178528942,-2.2804196476,0.1393252383\H,0,-0.5643335419,-5.076  
3413615,2.2632460045\H,0,-0.9520074862,-6.4035082196,3.3682781383\H,0,  
-1.0372855,-4.7138973079,3.9498313638\H,0,-2.2673694595,-5.110497891,0  
.5443747769\H,0,-3.9850254359,-5.4731968119,0.9396202166\H,0,-2.720611  
2518,-6.7374862037,1.0541311109\H,0,-4.4976187246,-2.1043275141,0.0843  
482264\H,0,-3.2128304236,-3.2248434769,-0.4093107178\H,0,-2.8751577154  
, -1.4832363915,-0.4085990309\H,0,-6.8038801605,-0.1287254209,-0.854049  
3847\H,0,-7.1852591642,0.6830296863,0.6755359766\H,0,-6.6001525691,-0.  
9933745875,0.7001188086\\Version=ES64L-G09RevE.01\HF=-2841.5392213\RMS  
D=8.052e-09\Dipole=1.4014246,1.5661002,-1.7515752\Quadrupole=-9.162422  
7,19.7879593,-10.6255366,-40.2453551,12.9036825,22.865614\PG=C01 [X(C3  
0H44C12N2O2Ru1S1)]\@

### 09.finalcomplex

1\1\GINC-JOKER-C8\Stability\RM06L\Gen\C30H44C12N2O2Ru1S1\RISHIRAM\14-S  
ep-2017\0\#\#P M06L/chkbasis stable(opt) pop(nbo) scrf(check) guess(rea  
d) geom(allcheck) nosym scf(fermi,xqc,maxcyc=200) int(grid=ultrafine)\  
\Title\0,1\C,0,-5.1564168542,-2.2015486926,7.0802603219\C,0,-6.001866  
2411,-1.7504383833,6.0528544881\C,0,-7.3752617434,-2.0562009261,6.0413  
761533\C,0,-7.8863842292,-2.8518906842,7.0687643538\C,0,-7.0697988434,  
-3.3513024359,8.0913239572\C,0,-5.7121233198,-3.0128784221,8.077057049  
8\N,0,-5.5068667834,-0.8843662307,5.0351747347\C,0,-4.8398382927,-1.19  
07947553,3.8939441353\N,0,-4.6244367352,-0.0215096426,3.2244543095\C,0  
, -5.2853523504,1.1178879158,3.8542040502\C,0,-5.6291809229,0.566642514  
7,5.2256099713\Ru,0,-4.0237331427,-2.7988743513,3.1503350035\C,0,-4.50  
60741937,-4.0690957479,4.4047461472\C,0,-1.852588954,-5.3851520954,0.5  
518967103\C,0,-4.1226641292,0.0599339497,1.8896669191\C,0,-2.793507231  
4,0.4734517509,1.6726809272\C,0,-2.3274661823,0.5214828089,0.353868135  
5\C,0,-3.1403892847,0.1922396517,-0.7339910384\C,0,-4.4779811454,-0.13  
82926881,-0.4845596515\C,0,-4.9982522199,-0.1904827081,0.8109986457\C,  
0,-1.9128641087,0.9321504693,2.7921239862\C,0,-2.5916667115,0.15895792  
63,-2.1262557982\C,0,-6.4643046909,-0.4080744824,1.023532645\C,0,-8.24  
89856298,-1.5882455741,4.9188032061\C,0,-7.6320419791,-4.243047044,9.1  
552331535\C,0,-3.7112978917,-1.8193231084,7.1166435556\C,0,-2.02450195  
64,-4.2918626596,-0.2195280822\C,0,-1.8324400537,-2.8906906975,0.25891  
30364\C1,0,-1.8327623599,-2.2148176198,4.004563112\C1,0,-5.6218702882,  
-3.5809791284,1.5211784579\H,0,-4.9191571159,0.9003381972,6.0070600224  
\H,0,-6.6433815085,0.8340555105,5.5657505595\H,0,-4.6117421208,1.99099  
47193,3.8912932549\H,0,-6.1839547084,1.4081708536,3.2726498473\H,0,-1.  
2861568247,0.8211228666,0.1750759516\H,0,-5.1450712685,-0.3540977821,-  
1.3298489391\H,0,-5.0598900406,-3.378743639,8.8811309837\H,0,-8.955400  
3168,-3.1021041787,7.0634887397\H,0,-7.0036007804,0.5590602077,0.99151  
59574\H,0,-6.894231601,-1.0443736707,0.2339903215\H,0,-6.692129363,-0.  
8829773969,1.9904596859\H,0,-0.8827511711,0.5573502263,2.6735475416\H,  
0,-1.8536892415,2.0378661822,2.8034476765\H,0,-2.2766093423,0.60040687  
44,3.7756362658\H,0,-3.1750123241,-2.1203409636,6.1984643313\H,0,-3.58  
09924685,-0.7242109245,7.2011144093\H,0,-3.1995470716,-2.2779081125,7.

## SUPPORTING INFORMATION

---

9785996027\H,0,-8.2533397791,-0.4880039832,4.8115067214\H,0,-7.9053321  
126,-1.9883818745,3.9457133791\H,0,-9.2929357978,-1.9106158796,5.06144  
26295\H,0,-3.3406087871,0.4717683547,-2.8737136255\H,0,-1.7030188283,0  
.8027439285,-2.2363640354\H,0,-2.2806228282,-0.8677955612,-2.401552213  
1\H,0,-7.0356695474,-4.2048550139,10.081965655\H,0,-8.673590637,-3.978  
5632488,9.4045141685\H,0,-7.6447414589,-5.2994069906,8.8262669986\C,0,  
-2.4816107091,-4.4139041127,-1.6372612312\C,0,-1.4752063098,-5.3814893  
778,1.9865230125\C,0,-3.4751734669,-4.9450893384,5.0460090273\C,0,-5.9  
061783053,-4.4986321041,4.6699540718\H,0,-2.6217544322,-5.461389292,-1  
.951850714\H,0,-1.7651712941,-3.9356500276,-2.3323083574\H,0,-3.443306  
9886,-3.8820576339,-1.7787147542\H,0,-2.8010234569,-2.3490155166,0.264  
751281\H,0,-1.1805382678,-2.328159565,-0.43685102\H,0,-1.3849968767,-2  
.8078614145,1.2617695251\S,0,0.3034731469,-5.485139431,2.3247872642\H,  
0,-1.9257695024,-6.2117151632,2.5580490056\H,0,-1.6999855642,-4.437729  
9982,2.5182685411\H,0,-6.6667001054,-3.8215911094,4.2606623977\H,0,-6.  
0945920446,-4.6619185346,5.7503946917\H,0,-6.0437918606,-5.4827121745,  
4.1742680958\H,0,-2.4390800901,-4.7555848514,4.7278263125\H,0,-3.71682  
54597,-6.015950388,4.89341185\H,0,-3.517743969,-4.7812140172,6.1435901  
274\H,0,-2.026203807,-6.3735280148,0.1022980953\C,0,0.8204281828,-7.02  
13512689,1.583994371\O,0,0.9778570803,-4.3936093151,1.6089178554\O,0,0  
.4622282303,-5.5986566021,3.7822771904\H,0,1.9016814509,-7.1024082594,  
1.7748757722\H,0,0.6290288137,-6.9866288518,0.5006349215\H,0,0.2869211  
188,-7.858751248,2.0584641812\\Version=ES64L-G09RevE.01\HF=-2841.52509  
58\RMSD=3.247e-09\Dipole=-2.9197779,0.8020828,0.4996115\Quadrupole=3.8  
159573,-2.7075613,-1.108396,-0.918792,-40.8295402,4.340891\PG=C01 [X(C  
30H44C12N2O2Ru1S1)]\@

Reaction of allylsulfide carbene and 2,3-dimethyl-2-butene (4S)

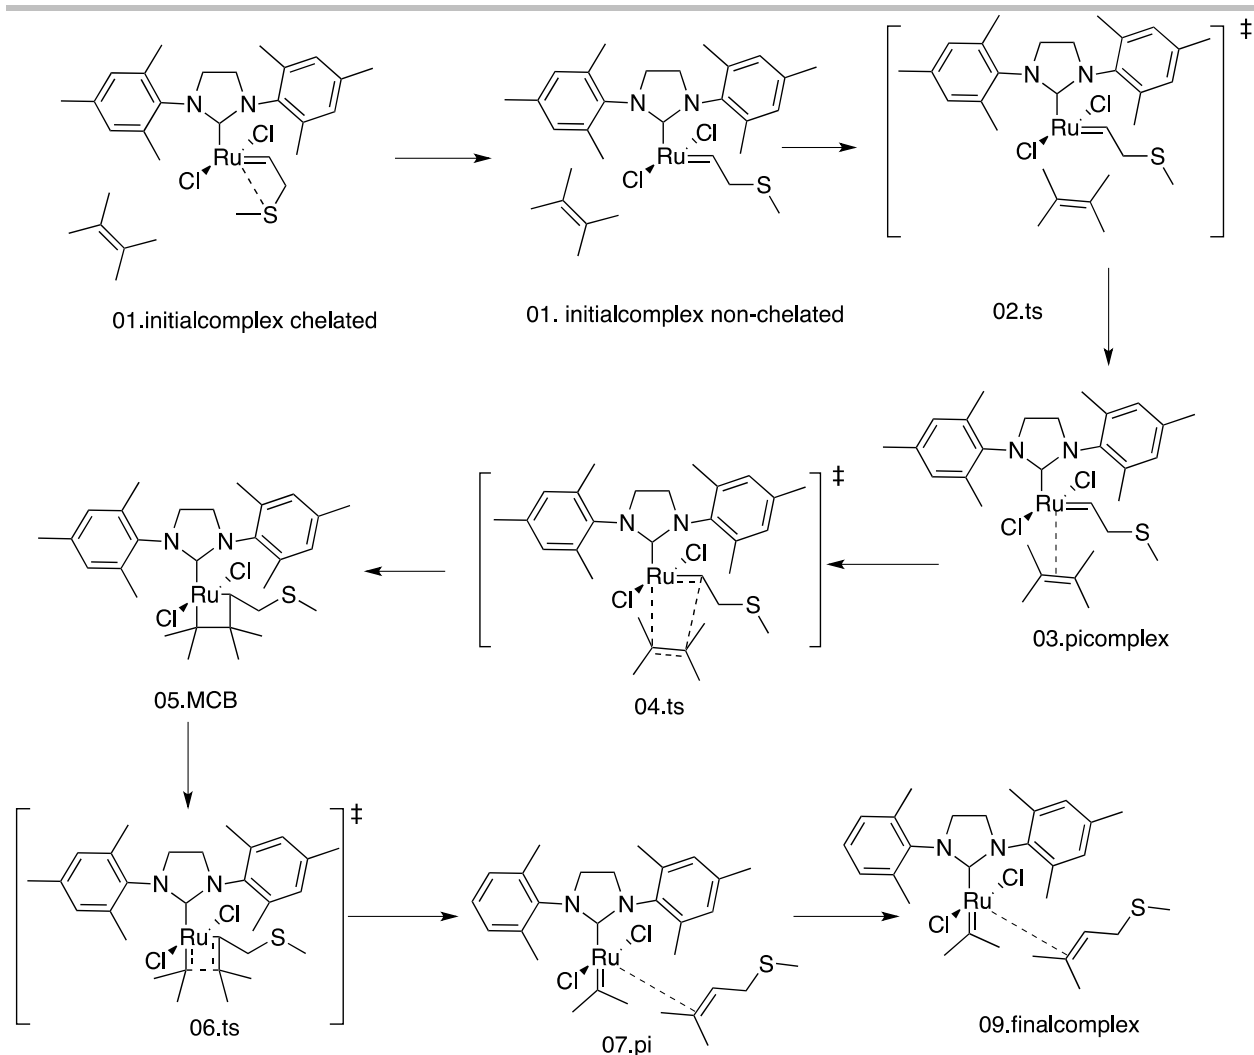

Scheme 5 Reaction of allylsulfidecarbene and 2,3-dimethyl-2-butene (tetrasubstituted alkene)

**01.initialcomplex**

```

1\1\GINC-C01\Stability\RM06L\Gen\C30H44Cl2N2Ru1S1\RISHIRAMT\25-Nov-201
7\0\#\#P M06L/chkbasis stable(opt) pop(nbo) scrf(check) guess(read) geo
m(allcheck) nosym scf(fermi,xqc,maxcyc=200) int(grid=ultrafine)\Title
\0,1\C,0,-4.1823924059,-1.5418835143,6.4621656298\C,0,-5.216222365,-1
.6411779045,5.5156777153\C,0,-6.2282310156,-2.6104403965,5.6250011443\
C,0,-6.1619632257,-3.512273171,6.6916802107\C,0,-5.128424697,-3.469387
2899,7.6346869668\C,0,-4.1578576638,-2.4693203086,7.507973114\N,0,-5.2
434097132,-0.7122034515,4.4370688337\C,0,-4.5440753757,-0.7511440817,3
.2730366855\N,0,-4.8218560838,0.4035980647,2.6032710968\C,0,-5.6171784
967,1.340859205,3.3901243965\C,0,-6.1203595199,0.4611046231,4.52174091
96\Ru,0,-3.3833459442,-2.0814166987,2.4400034566\C,0,-3.6425363273,-3.
4672089777,3.592824637\C,0,-4.1512510662,0.8214920441,1.4156519415\C,0
,-2.8647849692,1.3928072687,1.5180952254\C,0,-2.2009302717,1.734603667
6,0.3361311174\C,0,-2.7918415491,1.5695020293,-0.9212358961\C,0,-4.107
2216297,1.098013281,-0.974737676\C,0,-4.8119562196,0.7268853375,0.1752
482251\C,0,-2.2575226388,1.7422768294,2.8419910547\C,0,-2.0244102399,1
.8662205792,-2.1716344985\C,0,-6.2466649005,0.3144559013,0.0714673343\
C,0,-7.3023443787,-2.7156502117,4.5869783698\C,0,-5.0327868854,-4.4954
616709,8.7207833972\C,0,-3.1315220552,-0.4837359717,6.3350529296\C1,0,
-1.2324944577,-1.3758061733,3.211459055\C1,0,-5.0825224066,-2.70960244
07,0.8745386881\H,0,-6.0354137788,0.9323546597,5.515280433\H,0,-7.1762
270943,0.1581697406,4.3840909314\H,0,-4.981956846,2.1766463419,3.74728

```

## SUPPORTING INFORMATION

74106\H,0,-6.4280743455,1.7740700977,2.7798714645\H,0,-1.188822005,2.155747953,0.403420648\H,0,-4.6041795761,1.004019217,-1.9494889266\H,0,-3.345075288,-2.4133940347,8.2447128452\H,0,-6.9328038969,-4.2896565733,6.7749166522\H,0,-6.893063473,1.2046149754,-0.0563033548\H,0,-6.4171047146,-0.3335341566,-0.8041292243\H,0,-6.5929410754,-0.229382974,0.9627314166\H,0,-1.1590251439,1.6650513698,2.8152298766\H,0,-2.502946007,2.7904144745,3.1037743581\H,0,-2.6113923742,1.1027242592,3.6652332223\H,0,-2.5183092896,-0.6227588279,5.4237826863\H,0,-3.5728665331,0.5284060856,6.2620956233\H,0,-2.4508818016,-0.49046919,7.2024629709\H,0,-8.0706555227,-1.9277640413,4.6995554457\H,0,-6.891381245,-2.6155822924,3.5652465105\H,0,-7.826455273,-3.6830311936,4.6510287275\H,0,-2.6896492513,2.0752274684,-3.0259835134\H,0,-1.3438557174,2.7254420056,-2.0448658892\H,0,-1.3927990495,1.0032352433,-2.4589079014\H,0,-4.5743439917,-4.0858488684,9.6367585667\H,0,-6.018946825,-4.9125691516,8.9848248157\H,0,-4.4000662816,-5.3453682275,8.4003965804\H,0,-1.8250634266,-4.5046380063,2.9937255717\C,0,-2.7505056686,-4.657962734,3.5790735933\S,0,-2.3275903451,-5.2334562998,5.260192835\H,0,-3.2942476671,-5.5138789107,3.1293479729\C,0,-1.2791940379,-3.8726773666,5.8110118433\H,0,-1.821019749,-2.9130896228,5.787483071\H,0,-0.370264695,-3.7910504402,5.1910805958\H,0,-0.9899039333,-4.0959093254,6.8509829593\C,0,-1.0922340055,-3.9114105862,0.2525888076\C,0,-1.1502545475,-2.6616495902,-0.2754459779\C,0,-2.0602786783,-5.0092764003,-0.073214297\C,0,0.0459166577,-4.3355710347,1.1486722578\C,0,-2.2040323181,-2.1809590912,-1.2265546529\C,0,-0.0861957194,-1.6329826454,-0.0324943701\H,0,0.1921744338,-3.6456389667,1.9998858211\H,0,1.0112782095,-4.3828571373,0.6075485299\H,0,-0.1265548511,-5.3433266178,1.5664971015\H,0,0.6534314799,-1.9198763248,0.7297564043\H,0,-0.5291293793,-0.6689397968,0.2840126981\H,0,0.4644897629,-1.42444894,-0.9731848094\H,0,-2.9092172842,-4.6942983718,-0.6972089125\H,0,-2.4791571132,-5.4674046043,0.8431030436\H,0,-1.5431395542,-5.8348827307,-0.6032227904\H,0,-3.0201235959,-2.8950858433,-1.4065561899\H,0,-1.7535048989,-1.925299619,-2.2076473913\H,0,-2.6686214064,-1.2452640739,-0.857315907\H,0,-4.5054207666,-3.5674818486,4.2774397422\\Version=ES64L-G16RevA.03\HF=-2691.2589884\RMSD=4.302e-09\Dipole=-1.1648477,2.0403376,1.1160786\Quadrupole=7.1923812,-17.2771951,10.0848139,-14.7559909,-21.0556622,3.3090366\PG=C01 [X(C30H44C12N2Ru1S1)]\@\@

### 02.ts

1\1\GINC-C01\Stability\RM06L\Gen\C30H44C12N2Ru1S1\RISHIRAMT\26-Nov-2017\0\#\#P M06L/chkbasis stable(opt) pop(nbo) scrf(check) guess(read) geom(allcheck) nosym scf(fermi,xqc,maxcyc=200) int(grid=ultrafine)\Title\0,1\C,0,-4.1693517146,-1.5837951347,6.4885551204\C,0,-5.1315854104,-1.7035374101,5.4720661986\C,0,-6.1544812505,-2.6665081537,5.5312994025\C,0,-6.1676879894,-3.5447605651,6.6187186785\C,0,-5.2052136931,-3.4809805172,7.6332992206\C,0,-4.2240783407,-2.4870124249,7.5544123622\N,0,-5.1132060581,-0.7621220664,4.4026765401\C,0,-4.4060071661,-0.7937996584,3.2444150512\N,0,-4.658368618,0.374710807,2.591772114\C,0,-5.4435195691,1.3132542828,3.3881841938\C,0,-5.9741207425,0.4231613369,4.49720129\Ru,0,-3.2223496638,-2.1077600055,2.4115739976\C,0,-3.5853652901,-3.5276706007,3.4928022598\C,0,-4.0855757995,0.7768102928,1.3491377463\C,0,-2.7898037132,1.3301892527,1.3227336084\C,0,-2.2578372933,1.7050713907,0.0824736819\C,0,-2.9873916376,1.5917657817,-1.1034268142\C,0,-4.3030352679,1.1190198247,-1.0251244258\C,0,-4.8775670334,0.7168842449,0.1828575405\C,0,-2.0221881617,1.6321529168,2.5731750656\C,0,-2.3744940655,1.9452425832,-2.4226907344\C,0,-6.3167337724,0.307892961,0.2277975725\C,0,-7.1689811303,-2.7731696886,4.4344171671\C,0,-5.1952242356,-4.4804054394,8.7478344176\C,0,-3.1179047555,-0.5205597494,6.4201083085\C1,0,-1.1265762931,-1.4956774887,3.4005225334\C1,0,-4.9295246629,-2.679705459,0.8045349075\H,0,-5.8946574814,0.8762053787,5.4994732647\H,0,-7.0327448438,0.1372244875,4.3425105352\H,0,-4.7941847146,2.1297523699,3.7646334487\H,0,-6.2393552768,1.773157016,2.7779939121\H,0,-1.2412132787,2.119765197,0.0513060439\H,0,-4.9060805542,1.0583562116,-1.940870085\H,0,-3.4678820561,-2.4143283332,8.347722983\H,0,-6.9474254338,-4.31634

## SUPPORTING INFORMATION

63991, 6.6656574534\H, 0, -6.9728482375, 1.2000025552, 0.2505482669\H, 0, -6.5969090485, -0.2708875207, -0.6678664122\H, 0, -6.5514881669, -0.3074195904, 1.1096694828\H, 0, -0.9537716063, 1.3844818696, 2.4633185517\H, 0, -2.081396687, 2.7150940132, 2.7967749603\H, 0, -2.3932898698, 1.0875023701, 3.4543222362\H, 0, -2.4705841378, -0.6402051695, 5.5305261242\H, 0, -3.5603975524, 0.4915565495, 6.3497014754\H, 0, -2.4721500337, -0.5395727908, 7.3135951757\H, 0, -7.9416570535, -1.9843658712, 4.5058689528\H, 0, -6.706825629, -2.6728688285, 3.4345703562\H, 0, -7.6973141236, -3.7397889596, 4.4711224851\H, 0, -3.1240923314, 2.3251209892, -3.1373152913\H, 0, -1.5804650576, 2.7036666723, -2.3188803573\H, 0, -1.9090798397, 1.058317443, -2.8936978822\H, 0, -4.7772426431, -4.0585924643, 9.6774771754\H, 0, -6.204836182, -4.8665401565, 8.967155607\H, 0, -4.5691238149, -5.3542860682, 8.4834049184\H, 0, -1.6821809519, -4.5427944625, 3.1810383059\C, 0, -2.6802257818, -4.6997418779, 3.6273892304\S, 0, -2.4943589355, -5.2422119527, 5.362563301\H, 0, -3.1438089137, -5.5719946113, 3.1228070107\C, 0, -1.4199884509, -3.9434736455, 6.0032465169\H, 0, -1.8813509135, -2.9488862853, 5.8985894663\H, 0, -0.4420682812, -3.9458988815, 5.4922025859\H, 0, -1.2701133762, -4.1591947409, 7.0739579251\C, 0, -1.1201311999, -3.819870817, 0.3560064298\C, 0, -1.1344344383, -2.5423688423, -0.1137065341\C, 0, -2.1121399804, -4.873930955, -0.0344193718\C, 0, 0.0166434284, -4.32061117, 1.2128329584\C, 0, -2.1391588669, -1.9909314921, -1.0787814863\C, 0, -0.0344919812, -1.567346323, 0.1854285576\H, 0, 0.1946479848, -3.6819403898, 2.0972933618\H, 0, 0.9706756964, -4.3578052291, 0.6512435409\H, 0, -0.1741342182, -5.3460879814, 1.5748895092\H, 0, 0.6240307764, -1.8698648177, 1.0121479555\H, 0, -0.4453868331, -0.5699997668, 0.4342069282\H, 0, 0.5972079592, -1.4237334506, -0.7155419347\H, 0, -2.9635673257, -4.4985247039, -0.6197632241\H, 0, -2.5284428256, -5.3837247599, 0.855070556\H, 0, -1.6144482598, -5.6704071613, -0.6244305002\H, 0, -2.916991101, -2.7024692932, -1.3891510094\H, 0, -1.6239081479, -1.6261596145, -1.9905984764\H, 0, -2.6580964018, -1.109717958, -0.651999603\H, 0, -4.5522926783, -3.6614441012, 4.0150526159\\Version=ES64L-G09RevE.01\HF=-2691.2579873\RMSD=9.711e-10\Dipole=-1.0722786, 2.0633023, 0.8717289\Quadrupole=6.6342936, -16.0258072, 9.3915136, -15.3615109, -19.8323743, 3.755293\PG=C01 [X(C30H44Cl2N2Ru1S1)]\@

### 03.pi

1\1\GINC-C06\Stability\RM06L\Gen\C30H44Cl2N2Ru1S1\RISHIRAMT\19-Nov-2017\0\#\#P M06L/chkbasis stable(opt) pop(nbo) scrf(check) guess(read) geom(allcheck) nosym scf(fermi,xqc,maxcyc=200) int(grid=ultrafine)\Title\0, 1\C, 0, -4.1494338602, -1.6149064426, 6.4307120445\C, 0, -5.0578441984, -1.8008194044, 5.3741928868\C, 0, -6.046670982, -2.7994585171, 5.417272613\C, 0, -6.0757640784, -3.6467254378, 6.5286399938\C, 0, -5.1696185003, -3.51237374, 7.5859951249\C, 0, -4.2257083552, -2.4820050767, 7.5235414936\N, 0, -5.0566563932, -0.8534464395, 4.308846556\C, 0, -4.3059120512, -0.8228827339, 3.182829355\N, 0, -4.5651452979, 0.358432389, 2.55902442\C, 0, -5.4100430359, 1.2457479899, 3.3547274884\C, 0, -5.9638409599, 0.2984566528, 4.4022004468\R, 0, -3.0860019674, -2.1023151039, 2.3063360979\C, 0, -3.4409692577, -3.5416476269, 3.3713993313\C, 0, -4.002541098, 0.7986432616, 1.3241990114\C, 0, -2.7043691828, 1.3442778478, 1.3001979284\C, 0, -2.1825602599, 1.7501745166, 0.0647536447\C, 0, -2.9252102112, 1.6782906521, -1.1155011042\C, 0, -4.245685568, 1.2179015463, -1.0355258996\C, 0, -4.8094939643, 0.7823982505, 0.1655692851\C, 0, -1.918863371, 1.6058740699, 2.5483449197\C, 0, -2.3236818079, 2.0626933673, -2.4313226005\C, 0, -6.2515671192, 0.3844103153, 0.2142378047\C, 0, -7.0282352163, -2.9557673677, 4.2973466209\C, 0, -5.1732341351, -4.4765667607, 8.731026178\C, 0, -3.1371307016, -0.5132483983, 6.3764968484\C1, 0, -1.0171741363, -1.5072708086, 3.4181641316\C1, 0, -5.0126347144, -2.6790291145, 0.8982736777\H, 0, -5.951210178, 0.7159660737, 5.4225692652\H, 0, -7.0016414038, -0.0200149844, 4.1823171249\H, 0, -4.7991428498, 2.0624013671, 3.7909717569\H, 0, -6.1904268839, 1.7086970945, 2.7275413585\H, 0, -1.1627682767, 2.1572084549, 0.0349878262\H, 0, -4.8598467197, 1.1913327801, -1.9454669723\H, 0, -3.5146176814, -2.353467316, 8.3508337754\H, 0, -6.8272277667, -4.4466725153, 6.5633444466\H, 0, -6.8992781808, 1.2797508162, 0.2914444645\H, 0, -6.5512137147, -0.1463974356, -0.7046931272\H, 0, -6.4765128773, -0.2742328849, 1.0664614771\H, 0, -0.865577455, 1.3000723062, 2.4387898049\H, 0, -1.919382510



## SUPPORTING INFORMATION

7, 2.6909196976, 2.7687562028\H, 0, -2.3175771643, 1.0828181702, 3.430215512  
2\H, 0, -2.4662209252, -0.617193405, 5.5020608354\H, 0, -3.6141997914, 0.4819  
84122, 6.2874112295\H, 0, -2.5119549388, -0.5003104459, 7.284721104\H, 0, -7.  
8647757881, -2.2356449501, 4.3822083981\H, 0, -6.5613845665, -2.7863302594,  
3.3090581126\H, 0, -7.477784153, -3.9625963604, 4.2979140849\H, 0, -3.071869  
7665, 2.496980745, -3.1159123111\H, 0, -1.5013067977, 2.7879548828, -2.31299  
35951\H, 0, -1.8996672874, 1.1790549059, -2.9458491919\H, 0, -4.8581431038, -  
3.9998728069, 9.6748935835\H, 0, -6.1661270992, -4.9305223791, 8.888164137\  
H, 0, -4.4672857835, -5.3091399247, 8.5439380772\H, 0, -1.4200352944, -4.3297  
300706, 3.525520183\C, 0, -2.4641155482, -4.5958517749, 3.7540658215\S, 0, -2  
.5742319195, -5.0717598523, 5.5156825408\H, 0, -2.7105113036, -5.5229074376  
, 3.1968940301\C, 0, -1.4644634389, -3.8524313054, 6.2445526354\H, 0, -1.7739  
468171, -2.8250375475, 5.9974437865\H, 0, -0.4248224434, -4.0088906516, 5.90  
7977542\H, 0, -1.5142425179, -3.9911596154, 7.3371964066\C, 0, -1.3652313493  
, -3.7960219079, 0.4803140677\C, 0, -1.3699253243, -2.5215523993, -0.0171134  
178\C, 0, -2.3591783442, -4.8486502922, 0.0908061826\C, 0, -0.1787230356, -4.  
3188615975, 1.2488551352\C, 0, -2.3617921561, -1.9915266991, -1.0094412328\  
C, 0, -0.218297358, -1.5818880478, 0.1897285386\H, 0, 0.1410879183, -3.645259  
1591, 2.062621043\H, 0, 0.6944134991, -4.4504495825, 0.5790910634\H, 0, -0.38  
8024052, -5.3085207133, 1.689742218\H, 0, 0.4554678788, -1.863630378, 1.0097  
562817\H, 0, -0.5725630393, -0.552314454, 0.3850626704\H, 0, 0.3811088197, -1  
.5315369717, -0.7426009896\H, 0, -3.2467744198, -4.4610496727, -0.427461932  
6\H, 0, -2.7161045869, -5.4145410126, 0.9708186925\H, 0, -1.8705999711, -5.59  
64114609, -0.5668774421\H, 0, -3.170468052, -2.6875149265, -1.2685002121\H,  
0, -1.8291765702, -1.7138048703, -1.9417271541\H, 0, -2.8373822317, -1.06022  
17658, -0.6457780113\H, 0, -4.4820382545, -3.7775024682, 3.6753258756\\Vers  
ion=ES64L-G09RevE.01\HF=-2691.2584495\RMSD=1.271e-09\Dipole=-0.6845184  
, 1.9412825, 0.4189926\Quadrupole=2.7837528, -12.0857442, 9.3019914, -17.25  
37478, -16.3623471, 4.9108641\PG=C01 [X(C30H44C12N2Ru1S1)]\@

### 04.ts

1\1\GINC-C05\Stability\RM06L\Gen\C30H44C12N2Ru1S1\RISHIRAMT\17-Nov-201  
7\0\#\P M06L/chkbasis stable(opt) pop(nbo) scrf(check) guess(read) geo  
m(allcheck) nosym scf(fermi,xqc,maxcyc=200) int(grid=ultrafine)\Title  
\0, 1\C, 0, -4.0938182461, -1.5798244454, 6.5466385449\C, 0, -4.8572414007, -  
1.6811702452, 5.3721478465\C, 0, -5.8734002624, -2.6469839418, 5.2348554074  
\C, 0, -6.0764056397, -3.5429155929, 6.2848067191\C, 0, -5.3041474459, -3.504  
8390546, 7.451475163\C, 0, -4.3300605805, -2.5107364782, 7.5647709884\N, 0, -  
4.73527763, -0.6655175715, 4.3743581935\C, 0, -4.1446928715, -0.7086494002,  
3.168242354\N, 0, -4.3628128462, 0.4744286001, 2.5532758549\C, 0, -5.1063508  
466, 1.4272190662, 3.383131003\C, 0, -5.4471050407, 0.5997336067, 4.61165637  
55\Ru, 0, -2.9671580395, -2.1266764315, 2.2180888639\C, 0, -2.9076480356, -3.  
9307348695, 2.7251815803\C, 0, -3.9992705016, 0.8243876205, 1.2163680986\C,  
0, -2.7205930466, 1.3615604983, 0.9697245385\C, 0, -2.3990023004, 1.72392869  
67, -0.342159881\C, 0, -3.3130718553, 1.5888982001, -1.3930173606\C, 0, -4.59  
39863434, 1.1113074216, -1.0964264551\C, 0, -4.968069277, 0.736909727, 0.198  
1790847\C, 0, -1.7511541065, 1.5820557796, 2.0883932909\C, 0, -2.9200694263,  
1.917479007, -2.799691516\C, 0, -6.3786224774, 0.3238702947, 0.4796006062\C  
, 0, -6.7069782113, -2.7109553704, 3.9961104628\C, 0, -5.486342789, -4.533863  
313, 8.524024992\C, 0, -3.0877041979, -0.4887263725, 6.745378588\C1, 0, -1.21  
35809778, -1.5475108109, 3.8716948373\C1, 0, -4.9356416909, -2.6814951303, 0  
.8318961092\H, 0, -5.0986161634, 1.0572147081, 5.5538068594\H, 0, -6.5301018  
257, 0.403345685, 4.7210378826\H, 0, -4.475399185, 2.3059301885, 3.611823054  
7\H, 0, -5.996878002, 1.7911672765, 2.8406555198\H, 0, -1.3994849583, 2.13038  
98334, -0.5468478958\H, 0, -5.3346907696, 1.0271826822, -1.9026695424\H, 0, -  
3.7234698471, -2.4542733406, 8.4791666941\H, 0, -6.8584911863, -4.307194343  
4, 6.1831673598\H, 0, -7.0311516231, 1.2126362171, 0.5855383276\H, 0, -6.7893  
329338, -0.2773910516, -0.3478779463\H, 0, -6.4675751453, -0.2762767878, 1.3  
981316125\H, 0, -0.7797371155, 1.9388705023, 1.7078544987\H, 0, -2.126131177  
, 2.3460170447, 2.795938641\H, 0, -1.5708133038, 0.6669600172, 2.6818892262\  
H, 0, -2.7080810086, -0.0942045434, 5.7896917603\H, 0, -3.5182290626, 0.35490  
00065, 7.3195001597\H, 0, -2.2201736659, -0.8502089069, 7.324298612\H, 0, -7.

## SUPPORTING INFORMATION

160551244,-1.7327151406,3.7485715393\H,0,-6.106298807,-2.992703365,3.1  
103734973\H,0,-7.5253393107,-3.4418991601,4.1028650888\H,0,-3.78309756  
69,2.2422560162,-3.4047959113\H,0,-2.152117925,2.7082547446,-2.8394560  
113\H,0,-2.4913251679,1.0318160048,-3.3069991091\H,0,-5.1196501792,-4.  
1822232197,9.5032126647\H,0,-6.5432143563,-4.8304425314,8.6383329969\H  
,0,-4.9258599135,-5.4583822011,8.282744301\H,0,-1.1990734555,-4.127117  
412,4.0394734835\C,0,-2.1004503249,-4.6745231088,3.7324566526\S,0,-3.0  
808328283,-4.9739229016,5.2549358901\H,0,-1.8050740696,-5.657594658,3.  
3159601306\C,0,-1.8624702781,-4.4758369278,6.487384696\H,0,-1.57258947  
92,-3.4197117349,6.3500024088\H,0,-0.9647654865,-5.1176795412,6.455201  
6177\H,0,-2.3424469865,-4.5892645455,7.4731930529\C,0,-1.5398829814,-3  
.6639095241,0.967773068\C,0,-1.6439000553,-2.3072422825,0.4743019195\C  
,0,-2.2010386969,-4.7690460029,0.1801614416\C,0,-0.2183208587,-4.05571  
10765,1.5775975435\C,0,-2.3518447051,-2.0220458645,-0.8292367947\C,0,-  
0.4485150676,-1.3927082607,0.6303214692\H,0,0.0894444965,-3.3944644642  
,2.4026859476\H,0,0.5608726189,-3.9860677559,0.7929962492\H,0,-0.21566  
53369,-5.0963321642,1.9376001519\H,0,0.0127015324,-1.4087095406,1.6258  
144831\H,0,-0.7264687177,-0.350618929,0.3958259419\H,0,0.322303581,-1.  
6865765168,-0.1132583221\H,0,-3.2563816664,-4.5546994887,-0.0485138044  
\H,0,-2.1494759522,-5.7337780773,0.7138264075\H,0,-1.6629332067,-4.897  
7458669,-0.7801654823\H,0,-3.1437262507,-2.7344984288,-1.0860318075\H,  
0,-1.5955631297,-2.0279870043,-1.6425472905\H,0,-2.8028193799,-1.01340  
06396,-0.8219350612\H,0,-3.7087717847,-4.546459109,2.2631398378\\Versi  
on=ES64L-G09RevE.01\HF=-2691.2410935\RMSD=3.922e-09\Dipole=0.0901624,1  
.5072919,0.0914793\Quadrupole=-5.255135,-4.0325269,9.2876619,-21.52006  
18,-10.9483785,4.0189424\PG=C01 [X(C30H44C12N2Ru1S1)]\@

### 05.MCB

1\1\GINC-C03\Stability\UM06L\Gen\C30H44C12N2Ru1S1\RISHIRAMT\12-Nov-201  
7\0\#P M06L/chkbasis stable(opt) pop(nbo) scrf(check) guess(read) geo  
m(allcheck) nosym scf(fermi,xqc,maxcyc=200) int(grid=ultrafine)\Title  
\0,1\C,0,-4.0553113862,-1.5041247431,6.5050796523\C,0,-4.8795935974,-  
1.6131808317,5.3740190648\C,0,-5.9036623257,-2.5783679783,5.2960417055  
\C,0,-6.0416978775,-3.477233863,6.3528903301\C,0,-5.1979667141,-3.4427  
567439,7.4700087772\C,0,-4.2227421471,-2.4459343825,7.5285120405\N,0,-  
4.7960355281,-0.6226232181,4.3459025821\C,0,-4.1830101976,-0.678658435  
1,3.1531031874\N,0,-4.3937685355,0.4826488398,2.5049138748\C,0,-5.1796  
588063,1.4387176595,3.2929225401\C,0,-5.4981543355,0.6521828035,4.5555  
807012\Ru,0,-3.0119007552,-2.1379692778,2.3116148044\C,0,-2.6201088338  
, -4.0808782317,2.4945460141\C,0,-4.0034046016,0.8120215398,1.170318934  
7\C,0,-2.7299068244,1.3713206569,0.952857588\C,0,-2.3886264838,1.74300  
99357,-0.3511417128\C,0,-3.2796383321,1.5956058411,-1.4210991584\C,0,-  
4.5542560906,1.0864812097,-1.1534934456\C,0,-4.9472482885,0.7000078145  
,0.1325426265\C,0,-1.7867598244,1.5967886418,2.0928662179\C,0,-2.86800  
70391,1.9459692074,-2.8173358054\C,0,-6.3524936338,0.2486289358,0.3819  
415509\C,0,-6.808280663,-2.6467832232,4.1083128443\C,0,-5.3370491759,-  
4.4632512142,8.5578294483\C,0,-3.0626268665,-0.3957204564,6.6709830813  
\C1,0,-1.282573674,-1.5395708158,3.96186341\C1,0,-4.9921524124,-2.8010  
220918,1.0030515735\H,0,-5.1236691133,1.1357750567,5.4751860045\H,0,-6  
.5786838402,0.4669731076,4.6966237893\H,0,-4.586596718,2.3512008026,3.  
4850996342\H,0,-6.0800647562,1.7413982999,2.729238252\H,0,-1.393441623  
9,2.1696932184,-0.5346012011\H,0,-5.2757832415,0.9876593204,-1.9753036  
141\H,0,-3.5640856478,-2.3898618318,8.4060971639\H,0,-6.8279329502,-4.  
2419479731,6.296886127\H,0,-7.0355023015,1.1177281927,0.4509448117\H,0  
, -6.7202455274,-0.3804710129,-0.4454103636\H,0,-6.4500854009,-0.338291  
4988,1.3080775785\H,0,-0.8224613764,1.9962230296,1.7376764391\H,0,-2.1  
981858368,2.326887684,2.8156849216\H,0,-1.5838152437,0.6725607988,2.66  
5498489\H,0,-2.8213769062,0.1027109788,5.7200736761\H,0,-3.4424567888,  
0.368798691,7.3763581049\H,0,-2.1139434121,-0.7709140599,7.0916730443\  
H,0,-7.2498844509,-1.6631777676,3.8617852035\H,0,-6.2661845216,-2.9693  
546222,3.1990086728\H,0,-7.6373071309,-3.3527612695,4.2802743872\H,0,-  
3.7280428856,2.2512082185,-3.4366350672\H,0,-2.1226183639,2.7587820894

## SUPPORTING INFORMATION

, -2.8357448007\H, 0, -2.4041065795, 1.0776481894, -3.3232726026\H, 0, -4.6641534323, -4.2562103717, 9.4067032029\H, 0, -6.369569039, -4.5098614779, 8.9485111743\H, 0, -5.1019258236, -5.4788741303, 8.1869304393\H, 0, -1.1281036075, -4.134605799, 4.0683465505\C, 0, -1.975593965, -4.7226635342, 3.6876287026\S, 0, -3.1887316636, -4.882033035, 5.0367558832\H, 0, -1.603997458, -5.7323199951, 3.4118297734\C, 0, -2.044453065, -4.8971664509, 6.4283641993\H, 0, -1.4901833692, -3.9429964511, 6.4876896316\H, 0, -1.3297578902, -5.7364488962, 6.3627726564\H, 0, -2.6413190293, -5.016156834, 7.3468688516\C, 0, -1.6837612092, -3.7227709255, 1.256070698\C, 0, -1.8162116442, -2.1783073531, 0.6936631047\C, 0, -2.1166387857, -4.6877854659, 0.1456127179\C, 0, -0.2222376135, -3.9870713292, 1.6200923648\C, 0, -2.4189869475, -2.0192337741, -0.6846312393\C, 0, -0.539437342, -1.3646032789, 0.7474740078\H, 0, 0.1320222384, -3.3514666749, 2.4453365515\H, 0, 0.4274585564, -3.8156626355, 0.7456711587\H, 0, -0.0918913044, -5.0412334173, 1.918327483\H, 0, -0.0478510049, -1.3383485481, 1.7273958055\H, 0, -0.7662218065, -0.3260804786, 0.4491903197\H, 0, 0.1835749997, -1.7422741255, -0.0038869246\H, 0, -3.1865934066, -4.5886078977, -0.0922528337\H, 0, -1.9382616593, -5.725290721, 0.4810626312\H, 0, -1.528353437, -4.5257242217, -0.7745383555\H, 0, -3.3038351452, -2.6334336495, -0.8802858883\H, 0, -1.6533275583, -2.2318503163, -1.45924276\H, 0, -2.7162302417, -0.9634268809, -0.819266589\H, 0, -3.4960187786, -4.6587165517, 2.1495756046\\Version=ES64L-G09RevE.01\HF=-2691.2532323\S2=0.\S2-1=0.\S2A=0.\RMSD=4.816e-09\Dipole=-0.133666, 1.7450624, 0.1648481\Quadrupole=-3.4892874, -6.1021213, 9.5914087, -22.7889009, -12.2590253, 2.9666283\PG=C01 [X(C30H44C12N2Ru1S1)]\@

### 06.ts

l\l\GINC-C05\Stability\RM06L\Gen\C30H44C12N2Ru1S1\RISHIRAMT\17-Nov-2017\0\#\#P M06L/chkbasis stable(opt) pop(nbo) scrf(check) guess(read) geom(allcheck) nosym scf(fermi,xqc,maxcyc=200) int(grid=ultrafine)\Title \\0,1\C, 0, -4.0228538424, -1.4509381563, 6.4603083164\C, 0, -4.874940257, -1.6189344886, 5.3564562204\C, 0, -5.8852564207, -2.6014532351, 5.3482232369\C, 0, -5.979468144, -3.4585095628, 6.4444976629\C, 0, -5.1062796571, -3.3654681645, 7.5349214382\C, 0, -4.1453022556, -2.3528314854, 7.5246872867\N, 0, -4.836291397, -0.6659254438, 4.2907032819\C, 0, -4.2024439553, -0.7295187384, 3.1048493527\N, 0, -4.4636718259, 0.4095671486, 2.4327026123\C, 0, -5.3079134902, 1.3442831626, 3.1857691299\C, 0, -5.5724776165, 0.5918803069, 4.4788957428\Ru, 0, -3.0393925133, -2.2780288543, 2.3293332821\C, 0, -2.5949989552, -4.316618105, 2.461803661\C, 0, -4.0165825048, 0.7872827895, 1.1323077812\C, 0, -2.73719148, 1.3600478924, 1.0008877082\C, 0, -2.3376019826, 1.8000738161, -0.2640761353\C, 0, -3.1801086866, 1.7102636774, -1.3797866603\C, 0, -4.460017985, 1.1774441887, -1.1981620724\C, 0, -4.9070824826, 0.7165098425, 0.0462815054\C, 0, -1.8462767847, 1.5113135492, 2.1935958248\C, 0, -2.7107275505, 2.1469611688, -2.7330783321\C, 0, -6.3088671452, 0.2150534, 0.2013936167\C, 0, -6.8229862144, -2.7338927703, 4.191909133\C, 0, -5.2038512167, -4.3380940564, 8.6702689744\C, 0, -3.0520040837, -0.3149970535, 6.5559328734\C1, 0, -1.2922707976, -1.6902715359, 3.9757402348\C1, 0, -5.0522690887, -2.9418775922, 1.0636096822\H, 0, -5.190723813, 1.1159784328, 5.3737792631\H, 0, -6.6430968541, 0.3811026186, 4.6530153758\H, 0, -4.7737589585, 2.2999720202, 3.3365497088\H, 0, -6.2280752339, 1.5666995132, 2.6160968634\H, 0, -1.3377693416, 2.2398534423, -0.3792593667\H, 0, -5.141157234, 1.1143282074, -2.057126726\H, 0, -3.4636255173, -2.2511791151, 8.3803212644\H, 0, -6.7547911347, -4.2363640785, 6.4418568883\H, 0, -7.01992869, 1.0559926782, 0.3180132042\H, 0, -6.629709445, -0.347669172, -0.6914200505\H, 0, -6.420334288, -0.4532827236, 1.0692547704\H, 0, -0.8891023933, 1.9850231013, 1.9192180174\H, 0, -2.3170253962, 2.1411396122, 2.9723570693\H, 0, -1.6222883773, 0.541049384, 2.6768296157\H, 0, -2.81109559, 0.120295626, 5.5741509336\H, 0, -3.4538108324, 0.4900854633, 7.2018936017\H, 0, -2.101284442, -0.6410453365, 7.011041207\H, 0, -7.2731423106, -1.7653806172, 3.9054375649\H, 0, -6.3059460984, -3.1026212451, 3.2859603148\H, 0, -7.6446792573, -3.4310957985, 4.4243981023\H, 0, -3.5474740529, 2.4688869298, -3.375295197\H, 0, -1.9856290568, 2.9758109436, -2.6693392887\H, 0, -2.2015662735, 1.3201490217, -3.2640570663\H, 0, -4.4729473069, -4.1178767954, 9.4662104584\H, 0, -6.2099460082, -4.3354094237, 9.1277750545\H, 0,

## SUPPORTING INFORMATION

-5.0240690558,-5.3747204303,8.328383136\H,0,-1.1219460378,-4.263510052  
1,4.0479132973\C,0,-1.9746223423,-4.8707234672,3.7103154121\S,0,-3.185  
921085,-4.9238996894,5.0667122245\H,0,-1.6021271917,-5.8974539556,3.50  
28141185\C,0,-2.0422120547,-4.8394996141,6.4561043532\H,0,-1.493720369  
1,-3.8805766663,6.4466983077\H,0,-1.3242321675,-5.6785209064,6.4432075  
193\H,0,-2.6359779408,-4.8988950269,7.3820857539\C,0,-1.7453404334,-3.  
9856004514,1.3113847621\C,0,-1.950035456,-1.9969606676,0.7645901166\C,  
0,-2.1795424822,-4.6797139209,0.0372045921\C,0,-0.2582553498,-4.101301  
8007,1.5620998286\C,0,-2.5169291217,-1.9054339529,-0.6230301912\C,0,-0  
.5901685351,-1.3560717624,0.8083942083\H,0,0.0834790602,-3.4761589341,  
2.401155529\H,0,0.3322977611,-3.8483672358,0.6669468808\H,0,-0.0261588  
24,-5.1543386399,1.8127820318\H,0,-0.0911241519,-1.3867160117,1.783851  
609\H,0,-0.716687732,-0.2951653536,0.5200606253\H,0,0.0736319473,-1.79  
11418955,0.0360767656\H,0,-3.2580294036,-4.5612416771,-0.1503350246\H,  
0,-1.9774278677,-5.7612478139,0.158315535\H,0,-1.615444817,-4.34246350  
84,-0.8480283928\H,0,-3.4326755998,-2.48256243,-0.7912887432\H,0,-1.75  
7184458,-2.1714637439,-1.3843049569\H,0,-2.7652196958,-0.8415520048,-0  
.7995919702\H,0,-3.530037543,-4.8299067763,2.1794677313\\Version=ES64L  
-G09RevE.01\HF=-2691.2494797\RMSD=2.263e-09\Dipole=0.0746694,1.7702445  
, -0.1511725\Quadrupole=-3.7914742,-5.1638578,8.955332,-23.4578105,-9.9  
519228,4.1249568\PG=C01 [X(C30H44C12N2Ru1S1)]\@

### 07.pi

1\1\GINC-C06\Stability\RM06L\Gen\C30H44C12N2Ru1S1\RISHIRAMT\19-Nov-201  
7\0\#\#P M06L/chkbasis stable(opt) pop(nbo) scrf(check) guess(read) geo  
m(allcheck) nosym scf(fermi,xqc,maxcyc=200) int(grid=ultrafine)\Title  
\0,1\C,0,-3.9501834427,-1.274004532,6.2424177724\C,0,-4.8652585741,-1  
.6717840455,5.2487089979\C,0,-5.7844992416,-2.712384324,5.4753492411\C  
,0,-5.7398952582,-3.3786736859,6.7032912039\C,0,-4.8238658451,-3.03248  
21967,7.7021684519\C,0,-3.9344759308,-1.9852570556,7.4466361642\N,0,-4  
.9979822144,-0.8632925993,4.0753506535\C,0,-4.271373568,-0.8699743764,  
2.9225056446\N,0,-4.5891195884,0.2710743101,2.2531540135\C,0,-5.575501  
0476,1.101073117,2.9517599677\C,0,-5.8169179073,0.3400458368,4.2388007  
35\Ru,0,-3.1401997595,-2.4405953822,2.3962134033\C,0,-2.3509664176,-4.  
9777009723,2.3339465925\C,0,-4.0260168393,0.8327582346,1.0729413271\C,  
0,-2.7455286515,1.4139595871,1.135116361\C,0,-2.2463505077,2.036461120  
9,-0.0129526043\C,0,-2.9971324263,2.1349224701,-1.1909179911\C,0,-4.28  
43526137,1.5875435392,-1.1980403632\C,0,-4.8178337204,0.9302738559,-0.  
0852300124\C,0,-1.9542891355,1.3877364957,2.4040555231\C,0,-2.42803352  
61,2.7856233717,-2.414101101\C,0,-6.1779225173,0.3074327684,-0.1545142  
247\C,0,-6.7721357926,-3.1136311504,4.428969766\C,0,-4.8144463761,-3.7  
442992616,9.0209267799\C,0,-3.0647321717,-0.0771027923,6.0800684271\C1  
,0,-1.2871159147,-1.9653536043,3.9338104966\C1,0,-5.1023461522,-3.4027  
859251,1.2544048664\H,0,-5.490143441,0.8968835147,5.1369081347\H,0,-6.  
8754263979,0.0634538495,4.3932826317\H,0,-5.1651068994,2.1145760416,3.  
1129590985\H,0,-6.4886553183,1.2091752941,2.3397813916\H,0,-1.24268880  
76,2.4811873678,0.0229103612\H,0,-4.8900256393,1.6534091974,-2.1116913  
491\H,0,-3.2113744242,-1.6935708505,8.2205620416\H,0,-6.4480022731,-4.  
1985734087,6.8838437279\H,0,-6.9760246145,1.0155882873,0.1405144996\H,  
0,-6.4129756517,-0.0139587392,-1.1832019291\H,0,-6.2588236128,-0.57403  
25241,0.5054834871\H,0,-0.9845202918,1.8978095945,2.2802802551\H,0,-2.  
4958937801,1.8990631093,3.2230376868\H,0,-1.7574300957,0.3581465944,2.  
7598839466\H,0,-2.9064944205,0.1983026615,5.0263597255\H,0,-3.49230204  
16,0.8005424264,6.6036488544\H,0,-2.070627685,-0.2568683102,6.52134615  
2\H,0,-7.3086803557,-2.2448608268,4.006790493\H,0,-6.2737057983,-3.600  
5034889,3.5701490889\H,0,-7.5218468627,-3.8125925911,4.8353906714\H,0,  
-3.215834667,3.2135722004,-3.0564270864\H,0,-1.717192854,3.5896782172,  
-2.1589719316\H,0,-1.8725516569,2.0569565148,-3.0345483664\H,0,-3.8025  
056372,-3.7827784758,9.4597491457\H,0,-5.4595048009,-3.2319642486,9.76  
00509124\H,0,-5.1918262469,-4.7776032463,8.9347268398\H,0,-1.123423094  
3,-4.6425310501,4.0751239399\C,0,-1.9579348248,-5.2820879477,3.7395268  
046\S,0,-3.366174218,-5.0015284229,4.8507641456\H,0,-1.6273414373,-6.3

## SUPPORTING INFORMATION

39147779, 3.8277470774\C, 0, -2.4627389364, -5.0766452771, 6.407233562\H, 0, -1.8215999569, -4.1866337675, 6.5334457039\H, 0, -1.8421005922, -5.9890653147, 6.4446862034\H, 0, -3.1923685256, -5.1164223593, 7.2295402941\C, 0, -1.4582332812, -4.6742519181, 1.3478142985\C, 0, -2.3963357424, -1.7706596952, 0.8217622413\C, 0, -1.8558189544, -4.7871151192, -0.0871480359\C, 0, -0.0048279362, -4.4722055364, 1.6397840863\C, 0, -3.1093323278, -1.6151173618, -0.4826321914\C, 0, -0.932539355, -1.4757784689, 0.6881828564\H, 0, 0.154431169, -3.8479628669, 2.5366481254\H, 0, 0.5277402937, -4.0105031348, 0.7918702019\H, 0, 0.481394179, -5.4490287313, 1.8332882324\H, 0, -0.3308938761, -1.7328117828, 1.5696215041\H, 0, -0.8123510479, -0.3898283801, 0.4941423676\H, 0, -0.513509217, -1.9726519675, -0.2112838342\H, 0, -2.9494707636, -4.7348503961, -0.2215573612\H, 0, -1.5108449558, -5.7644207157, -0.4802060315\H, 0, -1.3698973859, -4.0257609232, -0.7222758913\H, 0, -4.2022860599, -1.5885651283, -0.4068913294\H, 0, -2.8503662367, -2.4872668446, -1.1175582191\H, 0, -2.7438749905, -0.7220508809, -1.028484814\H, 0, -3.3643605115, -5.2731751947, 2.0268214886\\Version=ES64L-G09RevE.01\HF=-2691.2631925\RMSD=1.422e-09\Dipole=0.3273131, 1.6800705, -0.212719\Quadrupole=-6.8943009, -4.6199292, 11.5142301, -25.9054369, -8.1678457, 2.0050304\PG=C01 [X(C30H44C12N2Ru1S1)]\@

### 09.finalcomplex

```
1\1\GINC-C11\Stability\RM06L\Gen\C30H44C12N2Ru1S1\RISHIRAMT\20-Nov-2017\0\#\#P M06L/chkbasis stable(opt) pop(nbo) scrf(check) guess(read) geom(allcheck) nosym scf(fermi,xqc,maxcyc=200) int(grid=ultrafine)\Title \\0,1\C,0,-3.9020924926,-1.2906258992,6.4271827032\C,0,-4.7712385187,-1.699840867,5.3995002007\C,0,-5.7720338693,-2.6666748943,5.6319731768\C,0,-5.8621937268,-3.237069276,6.9036139149\C,0,-5.0127678926,-2.8540812705,7.9512410964\C,0,-4.0403273068,-1.8873063721,7.6877463258\N,0,-4.8549665783,-0.9112999199,4.2083436173\C,0,-4.2014453824,-0.971270752,3.0111172478\N,0,-4.5695232886,0.1460244708,2.3177075842\C,0,-5.5930704426,0.9388809329,3.0046915629\C,0,-5.6070400949,0.3341727135,4.3879220341\Ru,0,-3.1002874659,-2.5206646197,2.4258156493\C,0,-2.2524922162,-5.1388510062,1.9471530174\C,0,-4.0252417331,0.7191670952,1.1347941428\C,0,-2.7604213254,1.3344655055,1.1985057643\C,0,-2.2828358908,1.9849875711,0.0572199971\C,0,-3.0424899704,2.0808688526,-1.1153801918\C,0,-4.3167226396,1.5040180239,-1.1220014126\C,0,-4.8275778944,0.8182178086,-0.0157041935\C,0,-1.96694066,1.3142215931,2.4659388546\C,0,-2.4968201574,2.7632251977,-2.3320384686\C,0,-6.1763144315,0.171584889,-0.0812380818\C,0,-6.7388318377,-3.0295275832,4.5515100044\C,0,-5.116361369,-3.5021254538,9.297279752\C,0,-2.8974864211,-0.1967522265,6.2358307077\C1,0,-1.177319462,-2.062291248,3.884443869\C1,0,-5.0929794299,-3.4565900453,1.2931415747\H,0,-5.102097046,0.9702933262,5.142124761\H,0,-6.6212886302,0.1174966472,4.764582737\H,0,-5.3164864032,2.0070025441,2.9970987014\H,0,-6.5665311977,0.840215286,2.4884779524\H,0,-1.2911207318,2.4557321141,0.0947503018\H,0,-4.9308625959,1.5708714396,-2.0299685617\H,0,-3.3651601771,-1.5709833835,8.4943626572\H,0,-6.6377108008,-3.9920630726,7.089348176\H,0,-6.9818604645,0.8548702949,0.2501199179\H,0,-6.4235141295,-0.1230943164,-1.1151113519\H,0,-6.2261363289,-0.7306676021,0.5536013321\H,0,-1.0218859456,1.8716267937,2.3554371155\H,0,-2.5327403302,1.7778167798,3.2974692524\H,0,-1.7230001708,0.2855633121,2.795146287\H,0,-2.7263971157,0.039880781,5.1747971797\H,0,-3.2161000271,0.7286738245,6.7532426658\H,0,-1.9210957646,-0.4783056484,6.6660037817\H,0,-7.3941516483,-2.1753698968,4.2928980251\H,0,-6.2242040394,-3.3136658635,3.6154376106\H,0,-7.3909954046,-3.8624724723,4.8621963051\H,0,-3.2988330533,3.1772815153,-2.9658852796\H,0,-1.8079184705,3.5837215015,-2.0688672219\H,0,-1.9231752952,2.0590103008,-2.9641505231\H,0,-4.713975434,-2.8582015528,10.0970476015\H,0,-6.1589959614,-3.7580280602,9.5517993182\H,0,-4.5427068429,-4.4485302103,9.329297814\H,0,-1.1873462182,-4.9052982371,3.8091868191\C,0,-2.0995395411,-5.3772339817,3.4062153247\S,0,-3.5165958371,-4.6338576443,4.2911716649\H,0,-2.0608203526,-6.4595679719,3.6437717685\C,0,-2.7151821948,-4.5080546542,5.8995008832\H,0,-1.948276477,-3.7147392425,5.8774563798\H,0,-2.2571167795,-5.4802480633,6.1482343726\H,0,-3.4812357486,-4.2732750592,6.650840953\C,0,-1.2521199
```

## SUPPORTING INFORMATION

---

44,-4.7985348579,1.0939037695\C,0,-2.4221501549,-1.804287031,0.8223311  
824\C,0,-1.486673051,-4.8467933798,-0.3807087485\C,0,0.1531635895,-4.5  
391438145,1.5390878839\C,0,-3.1386001213,-1.7053157705,-0.4858272548\C  
,0,-0.9626574263,-1.4953936429,0.6566180295\H,0,0.1981177262,-3.978291  
0118,2.4890289593\H,0,0.720194925,-3.9734336532,0.780401176\H,0,0.6925  
09681,-5.4946748262,1.6912144624\H,0,-0.3345488345,-1.7747112071,1.512  
9986474\H,0,-0.8596692941,-0.400710673,0.5062269901\H,0,-0.5564260002,  
-1.9449886042,-0.2725771117\H,0,-2.5560586027,-4.9388680864,-0.6334908  
986\H,0,-0.9625329917,-5.7241899109,-0.809071614\H,0,-1.0655186991,-3.  
9698146522,-0.9040151055\H,0,-4.2323573959,-1.6902804362,-0.4125736522  
\H,0,-2.8663193734,-2.596616908,-1.0880026671\H,0,-2.7826400508,-0.829  
4870015,-1.0654243379\H,0,-3.2265333256,-5.4031742806,1.5135581196\\Ve  
rsion=ES64L-G09RevE.01\HF=-2691.2653359\RMSD=4.127e-09\Dipole=0.254512  
4,1.4543827,0.2768673\Quadrupole=-9.9551198,-5.0324962,14.987616,-23.4  
448856,-12.96445,-0.7594326\PG=C01 [X(C30H44Cl2N2Ru1S1)]\@

## NMR Spectra of the compounds

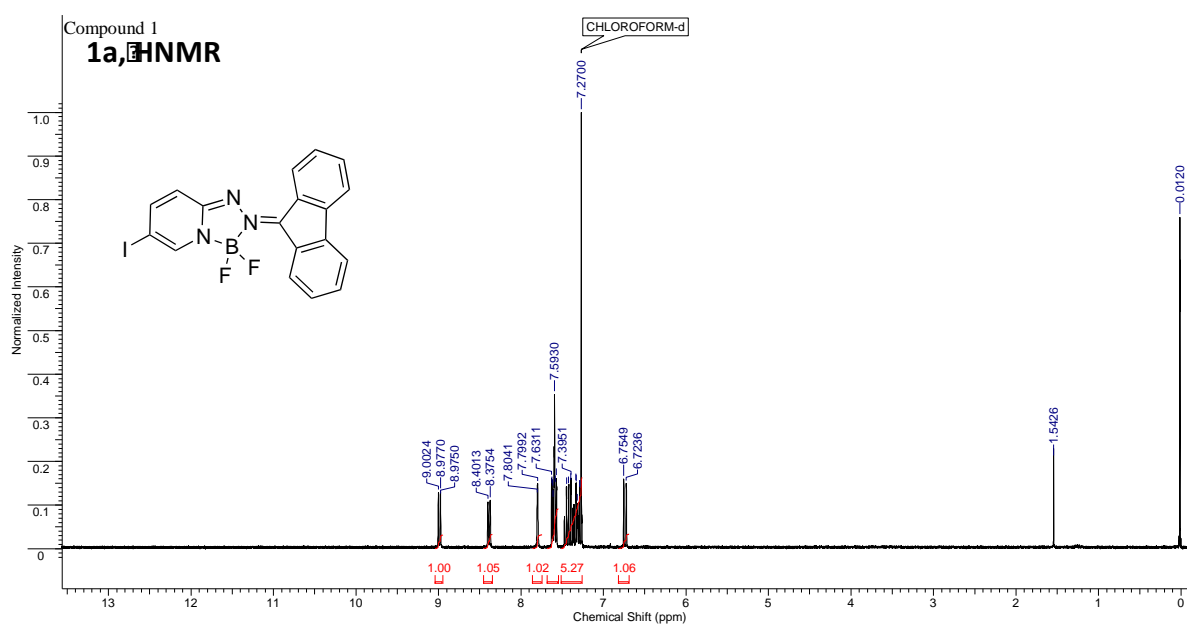

# SUPPORTING INFORMATION

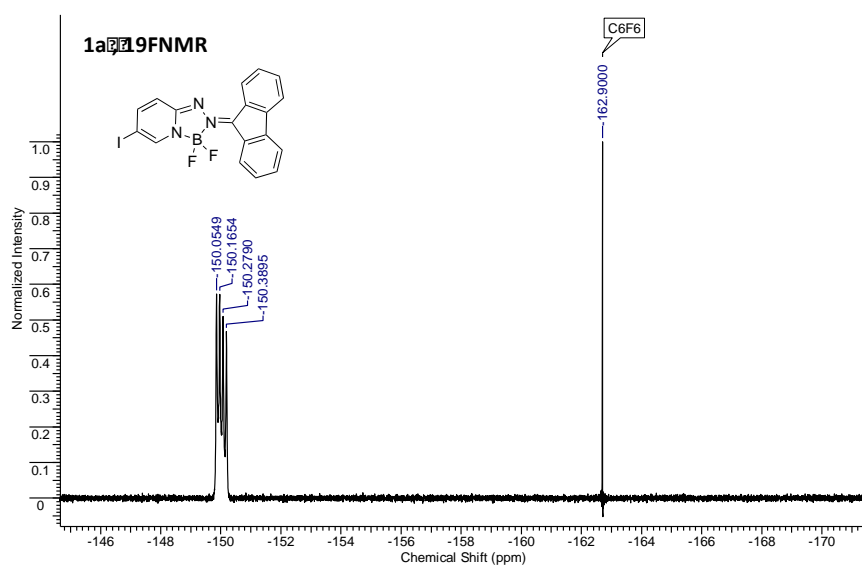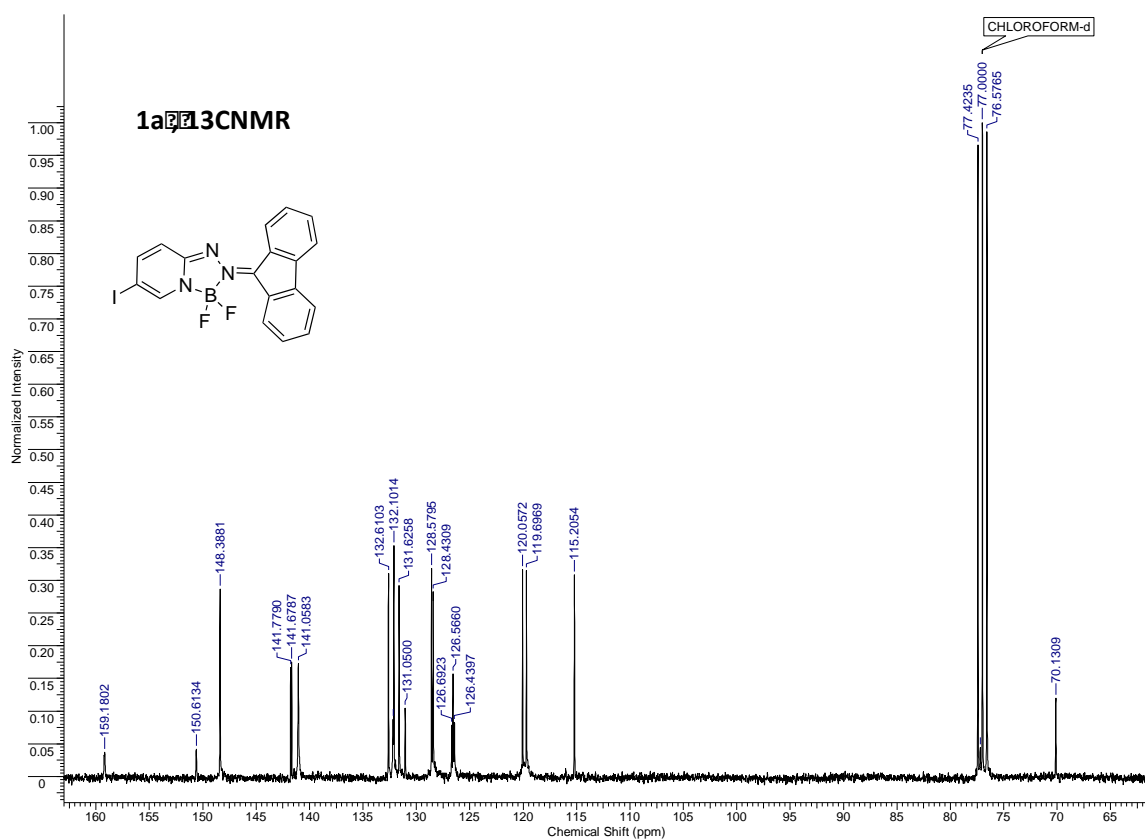



# SUPPORTING INFORMATION

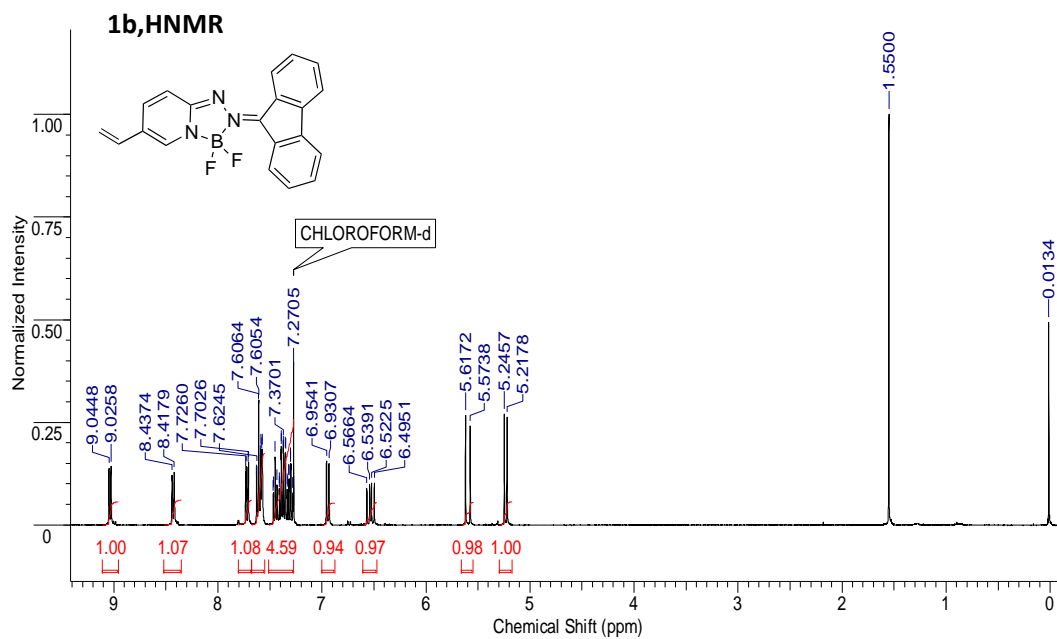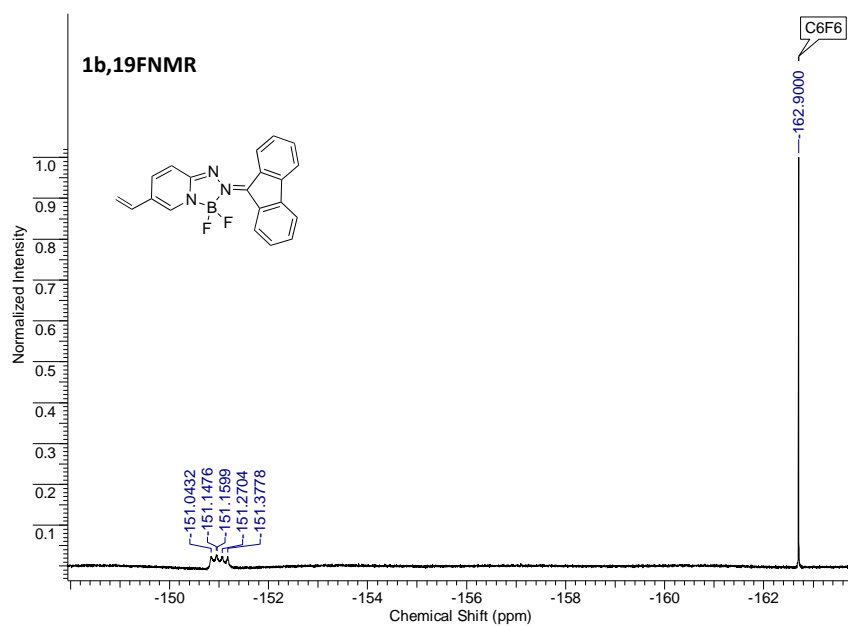

# SUPPORTING INFORMATION

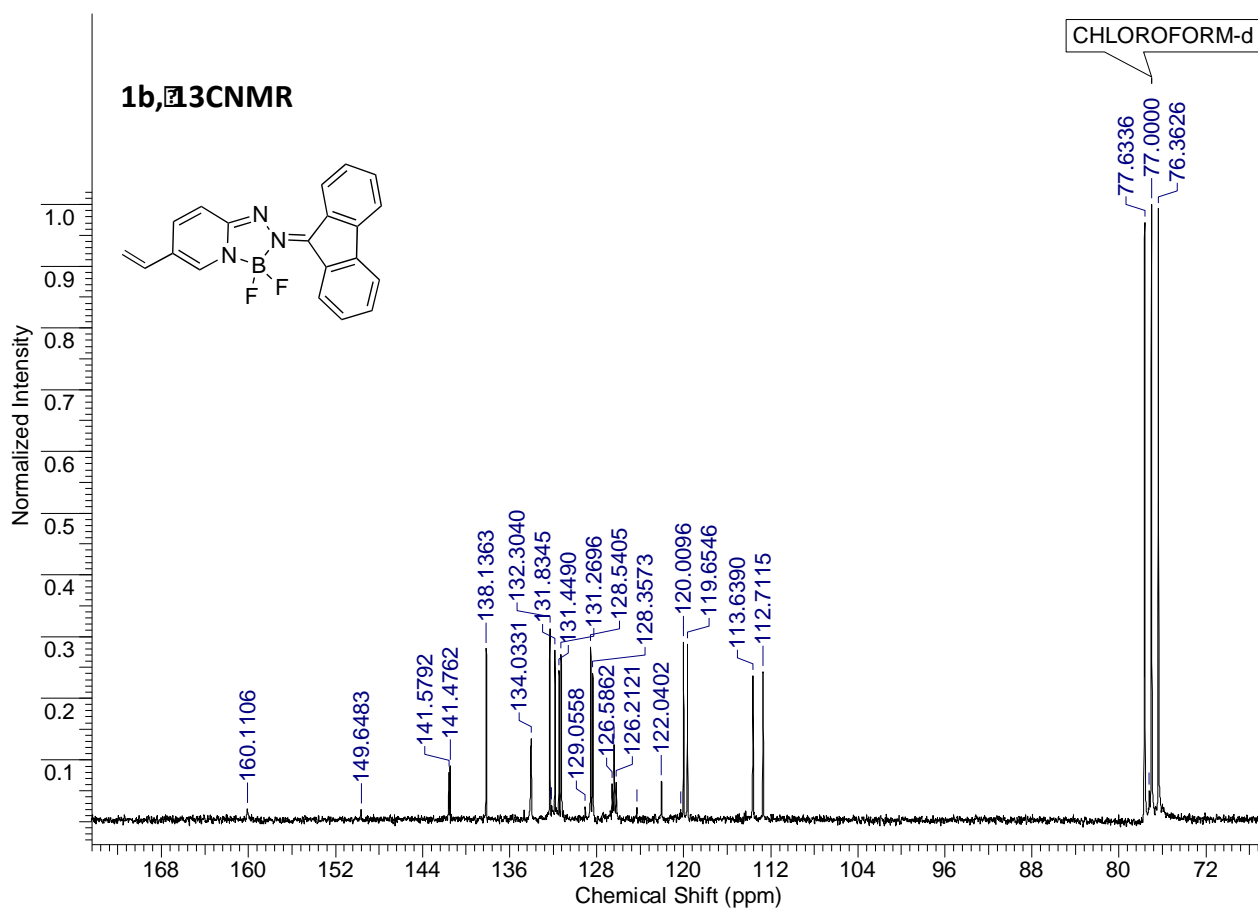

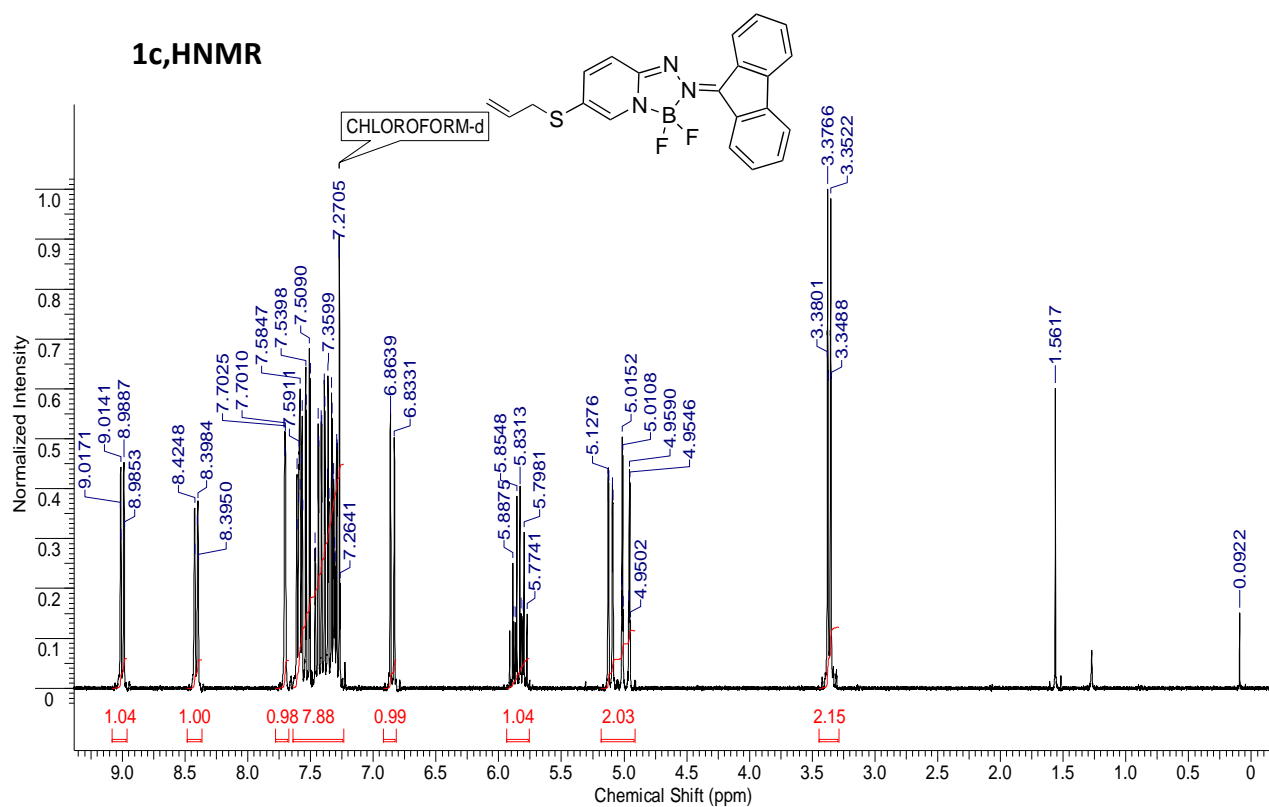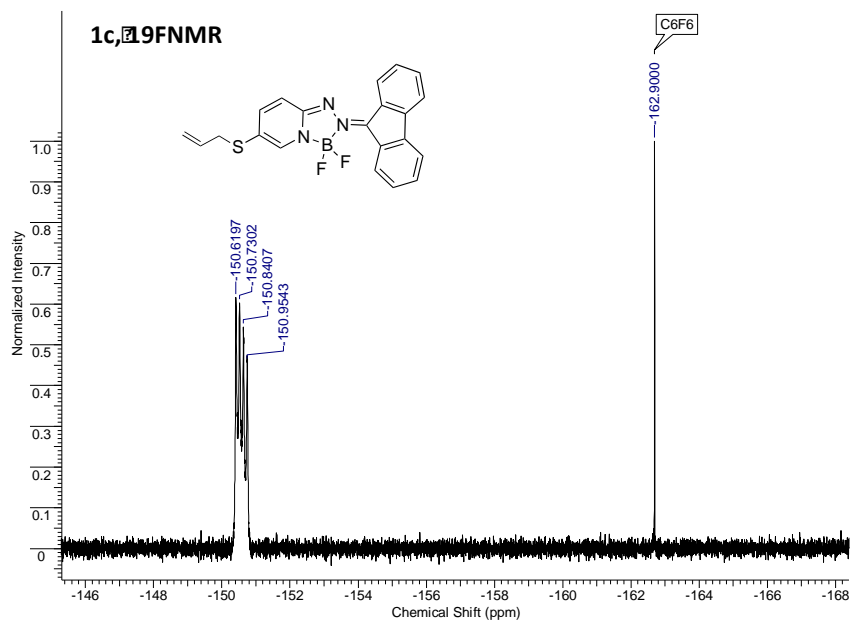

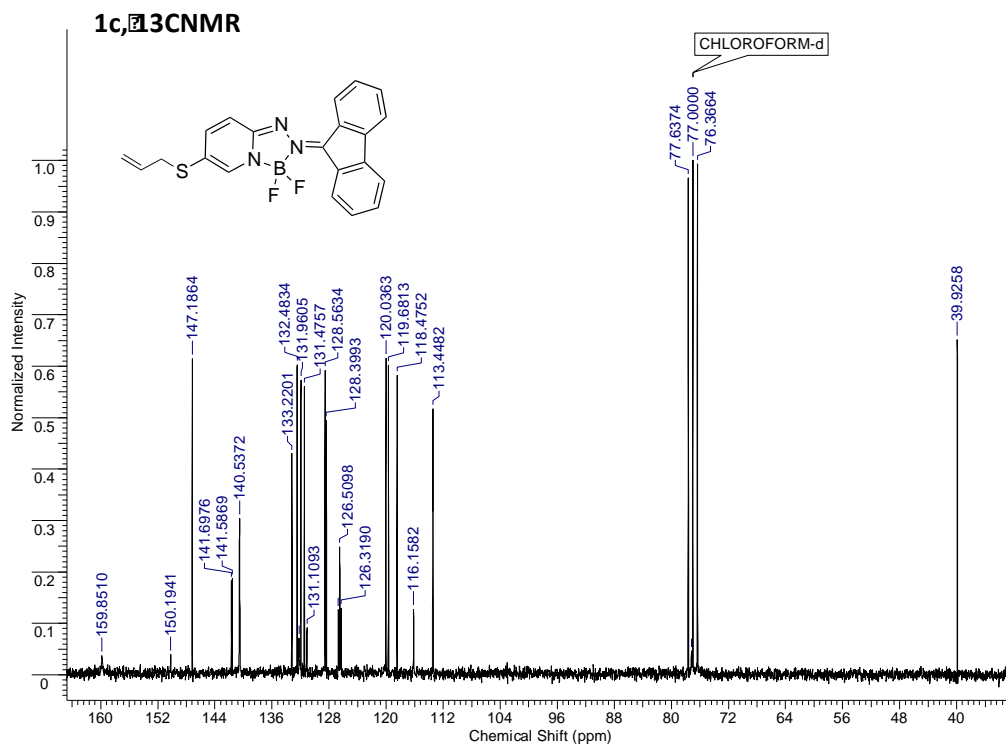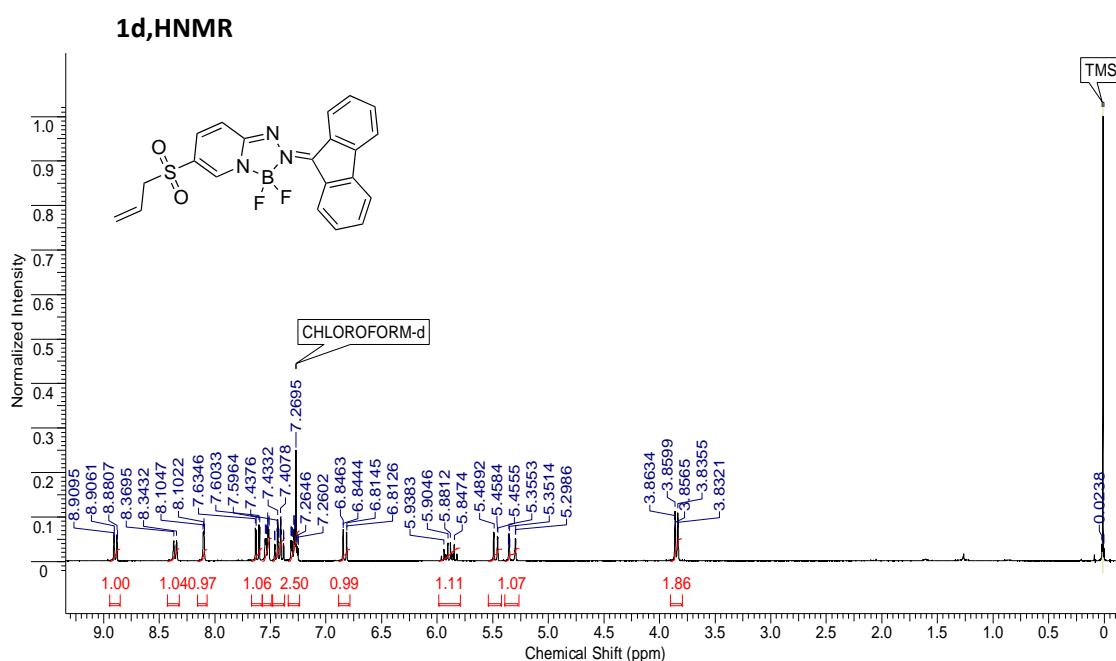

# SUPPORTING INFORMATION

## 1d, <sup>19</sup>F NMR

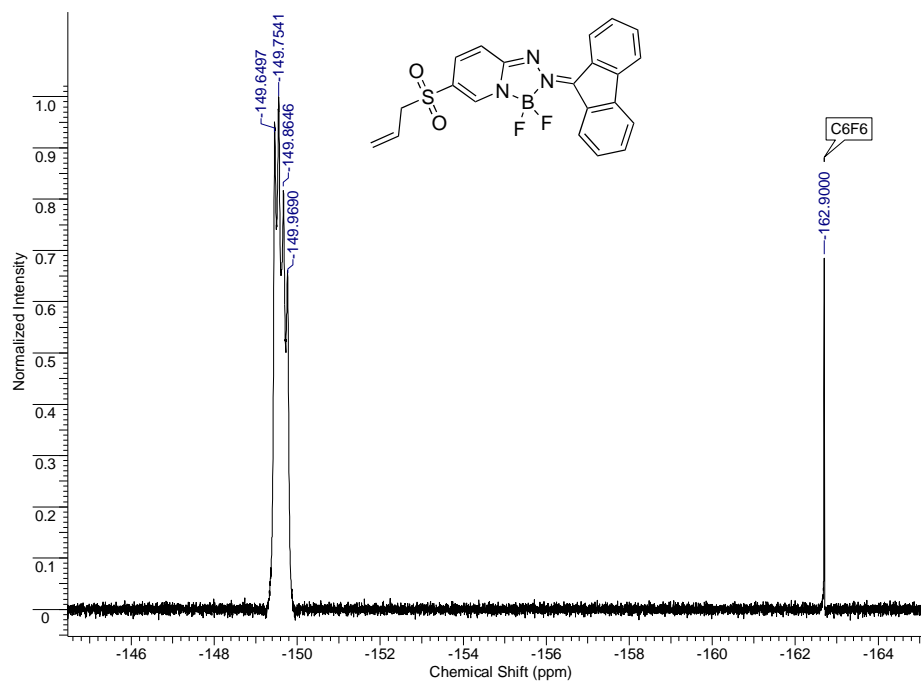

## 1d, <sup>13</sup>C NMR

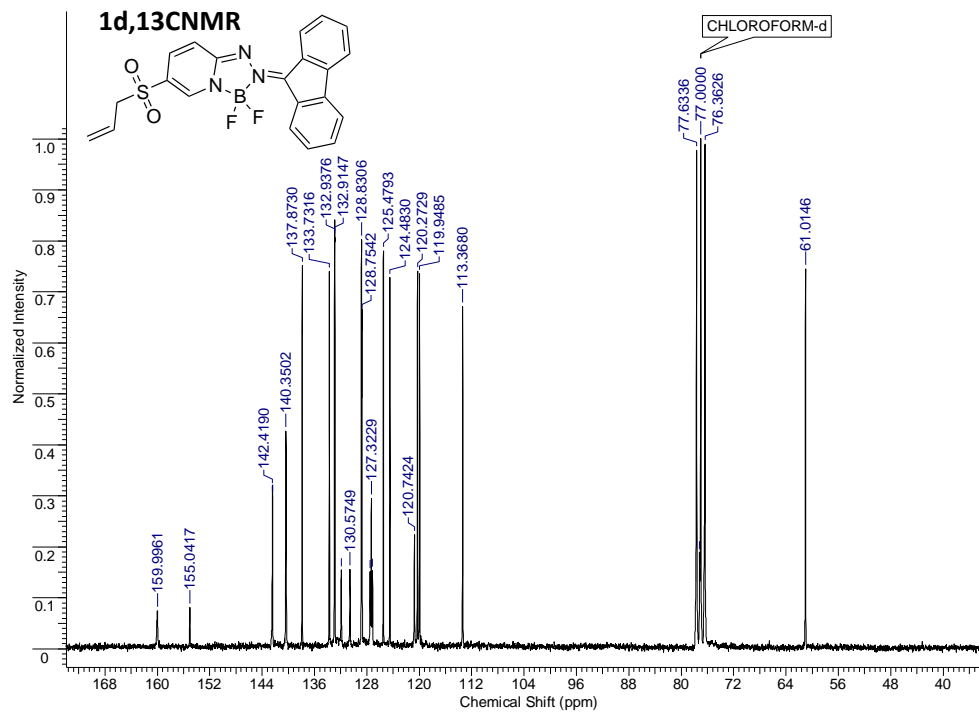

# SUPPORTING INFORMATION

## 2d, <sup>1</sup>H NMR

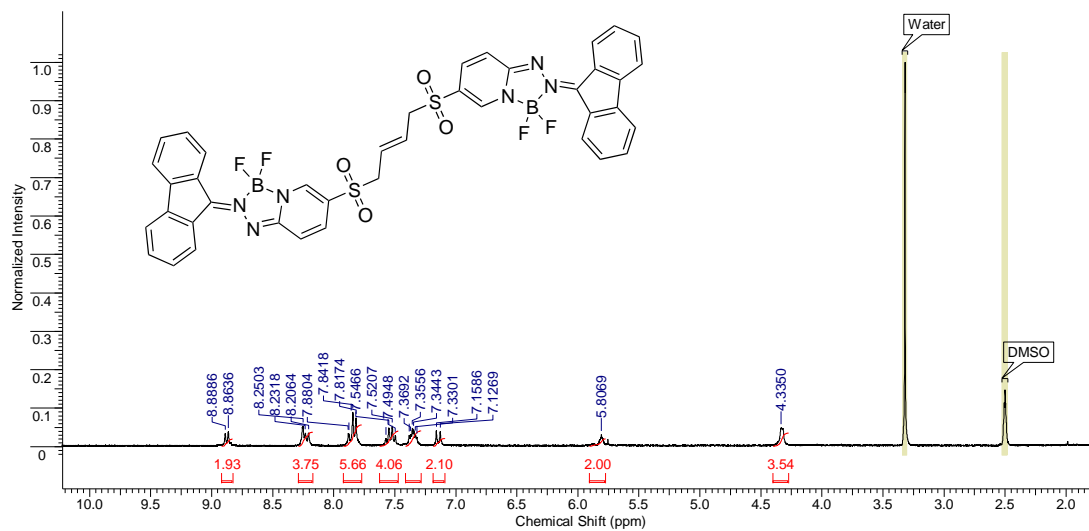

## 2d, <sup>13</sup>C NMR

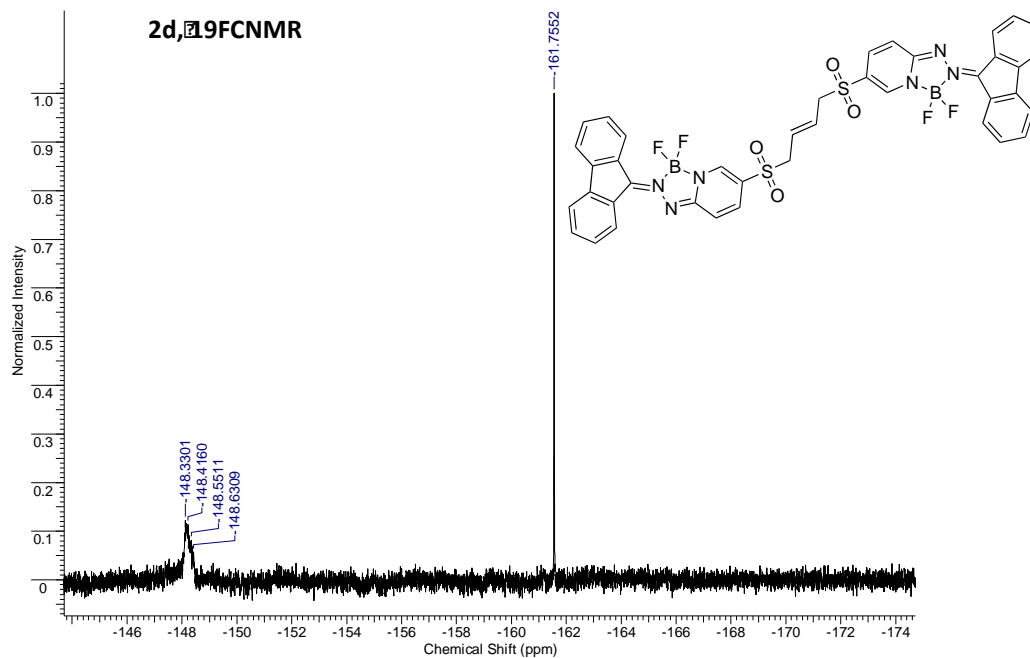

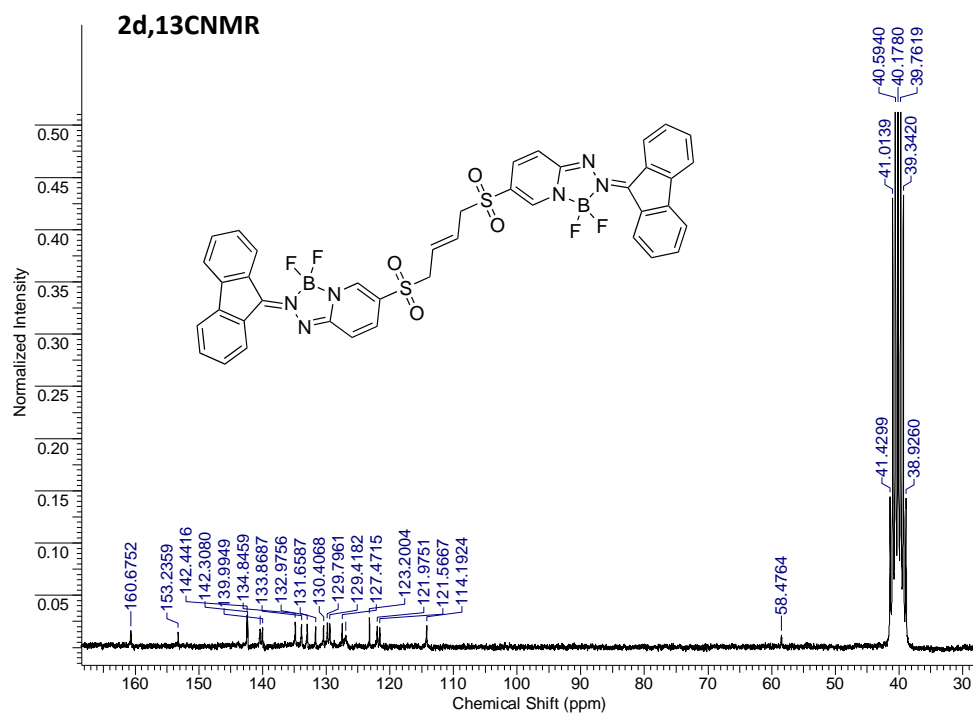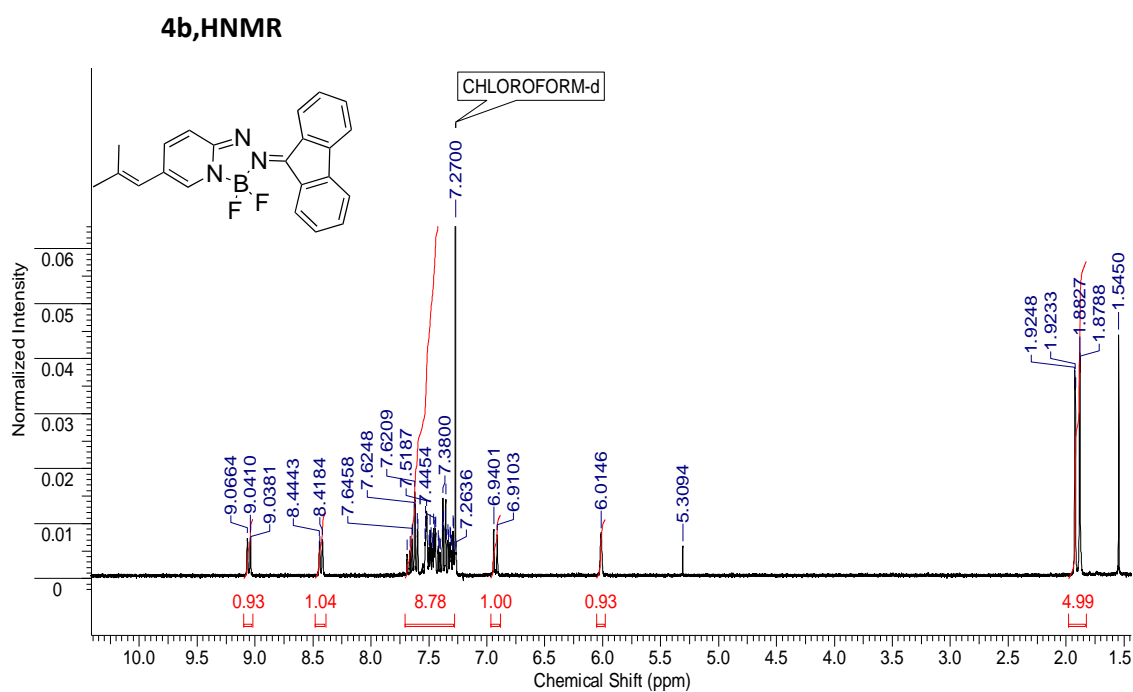

# SUPPORTING INFORMATION

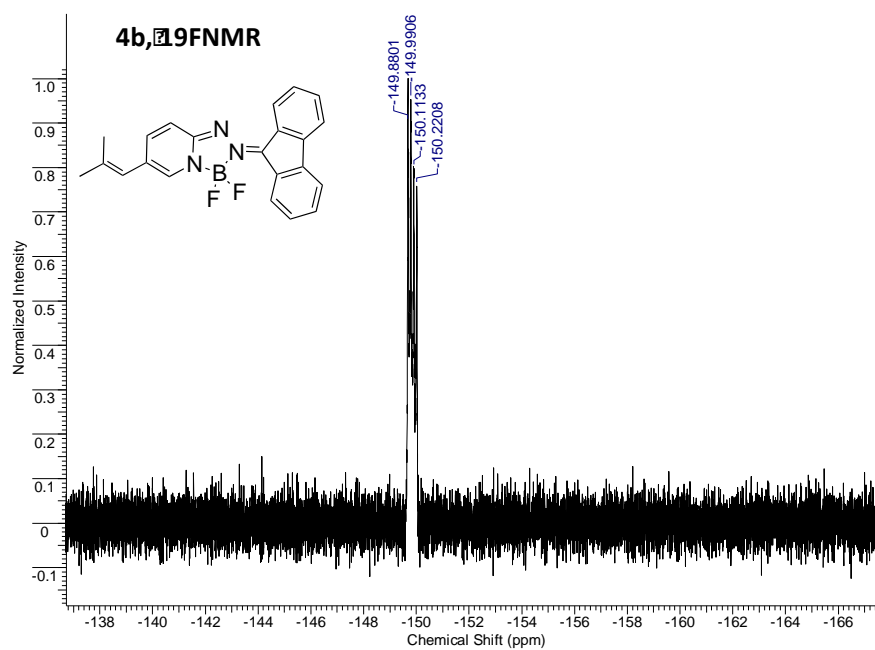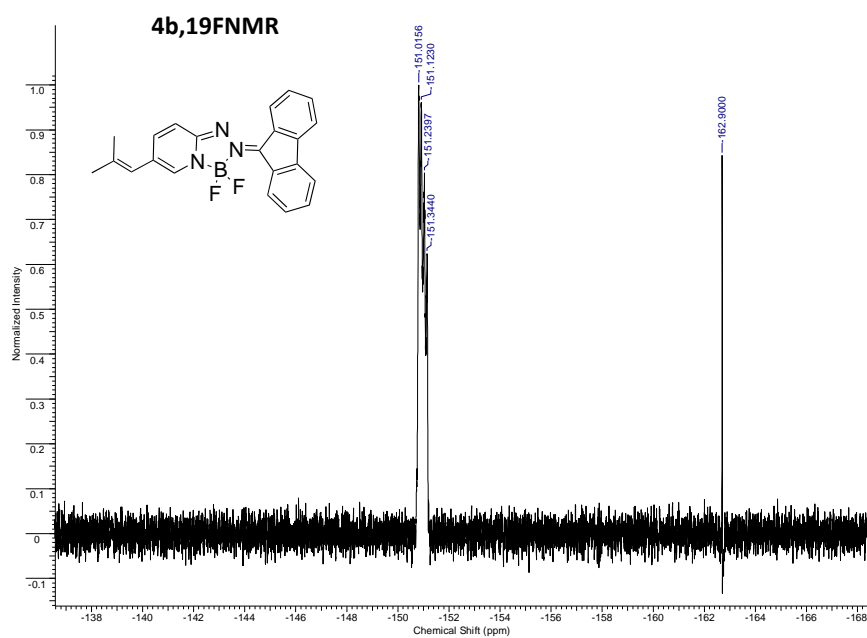



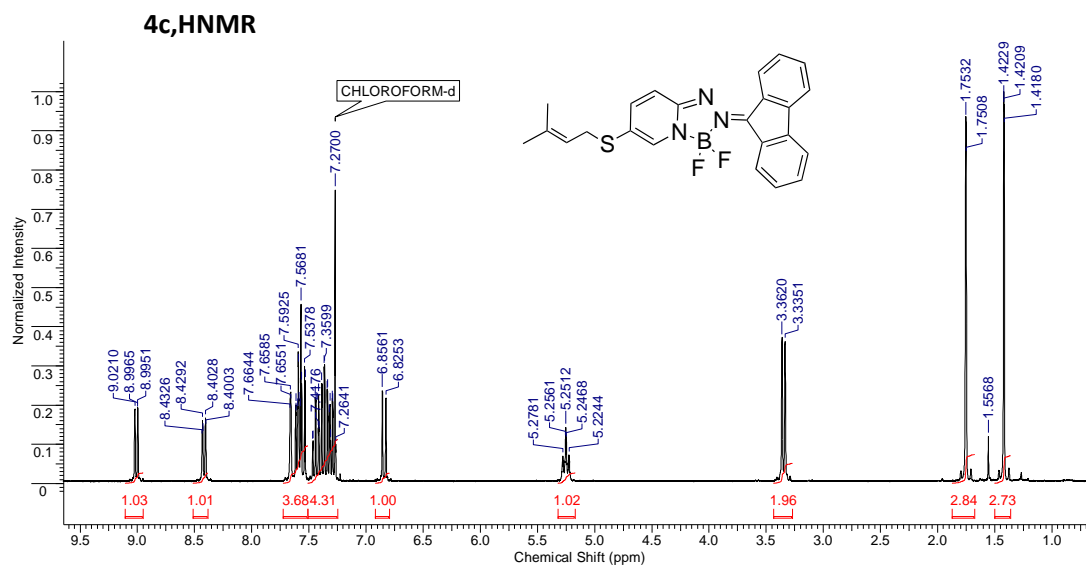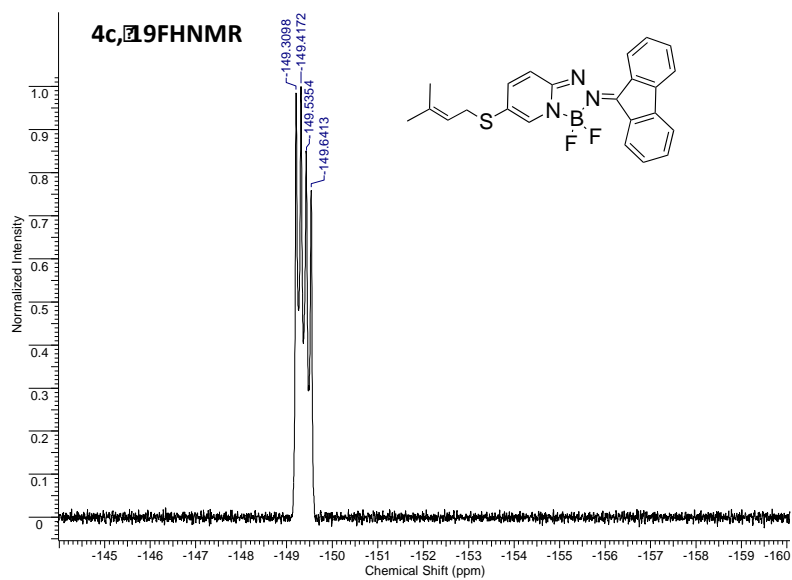

# SUPPORTING INFORMATION

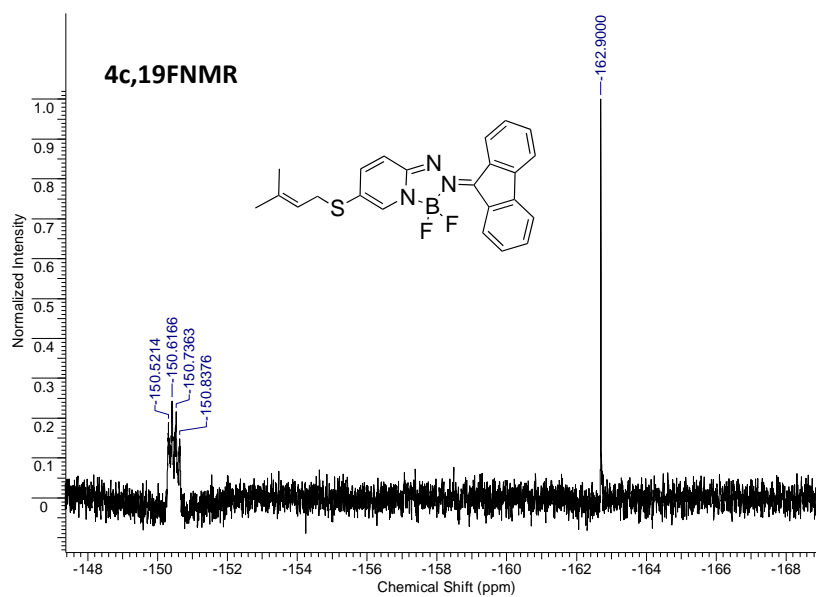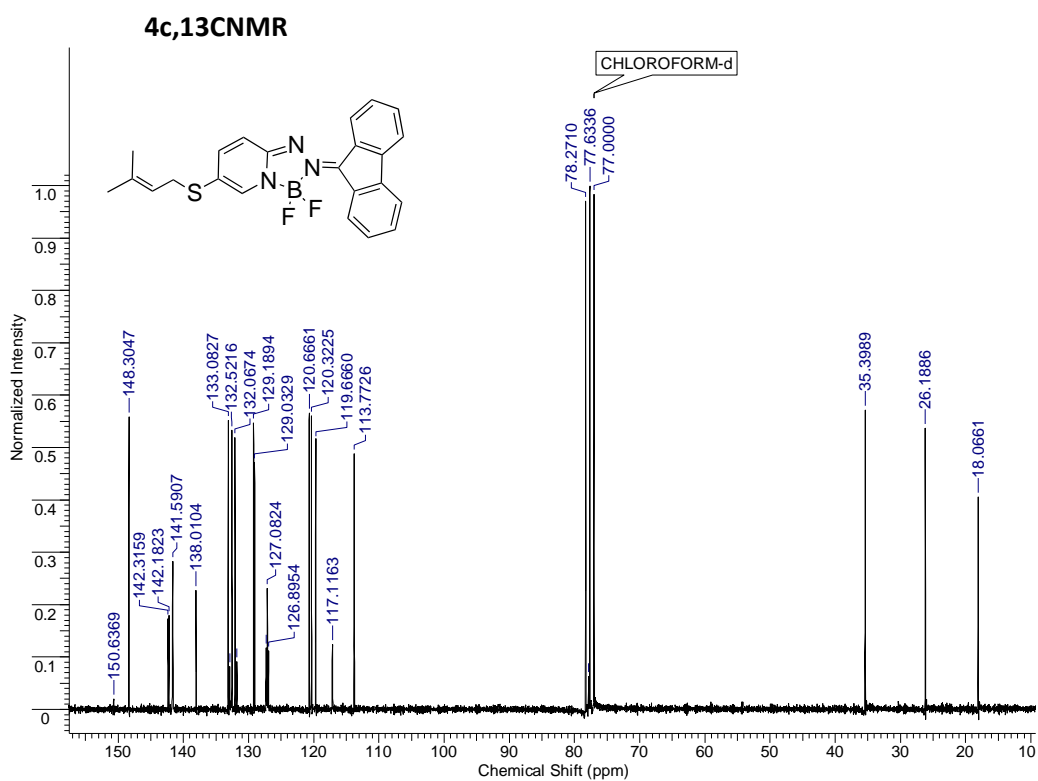

# SUPPORTING INFORMATION

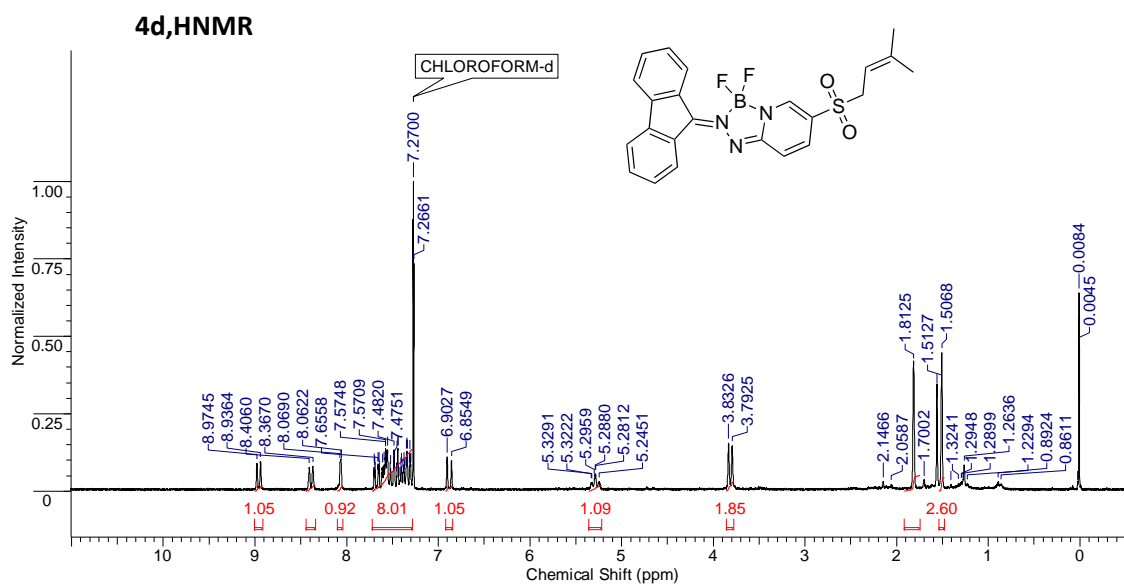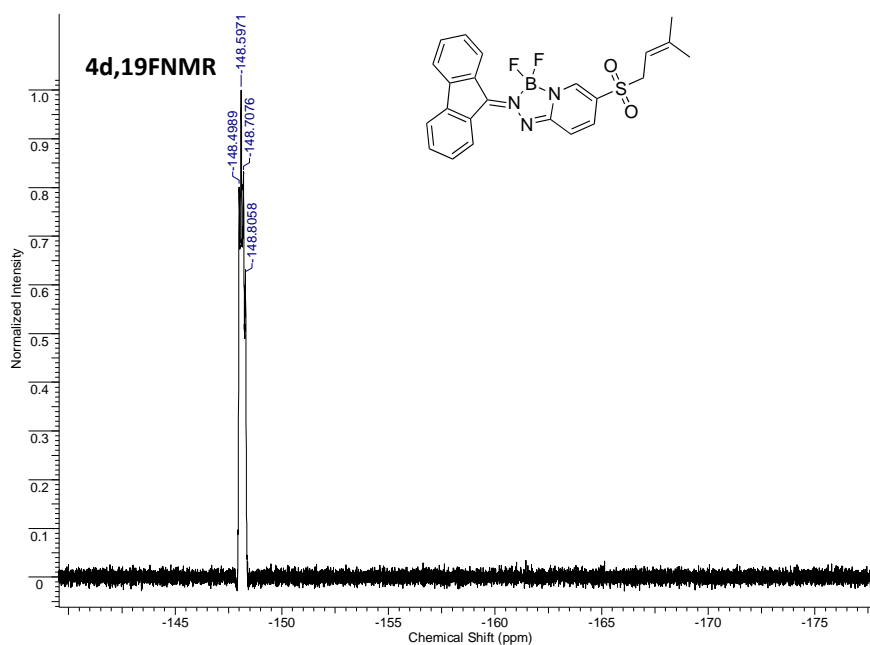

# SUPPORTING INFORMATION

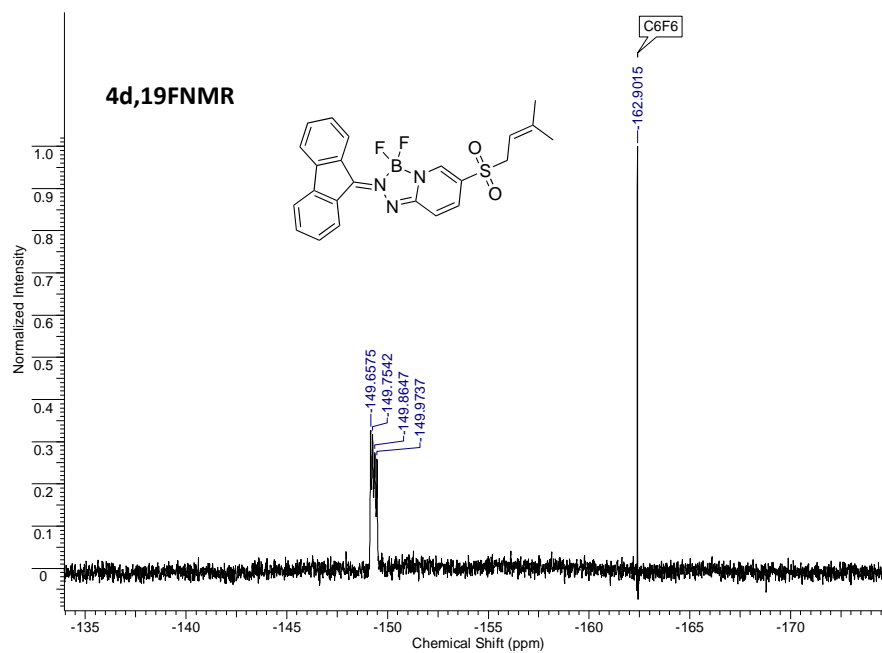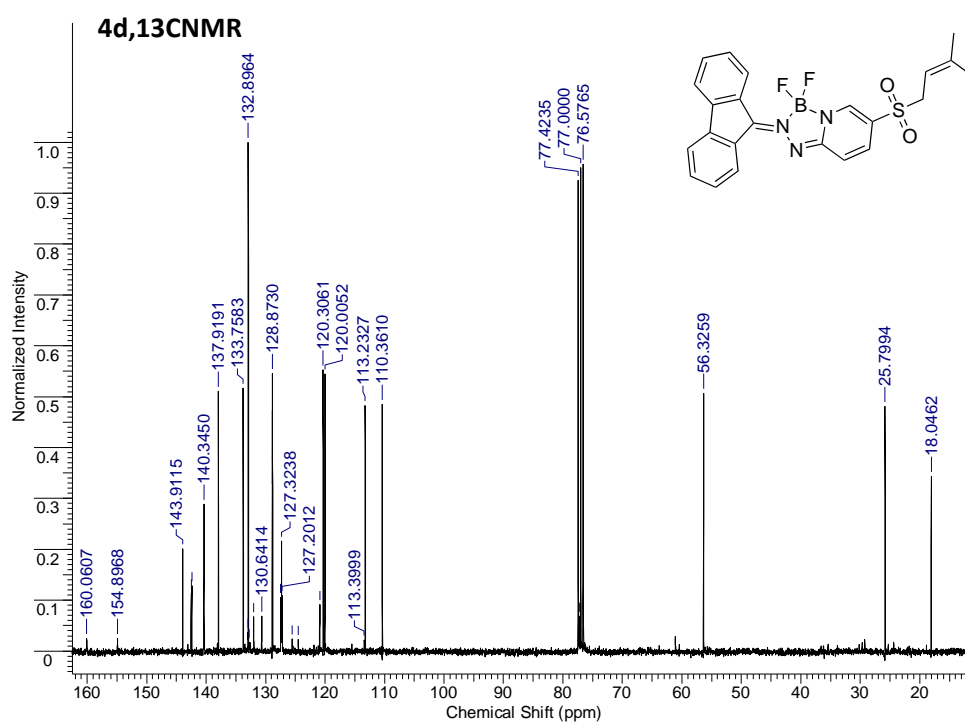

# SUPPORTING INFORMATION

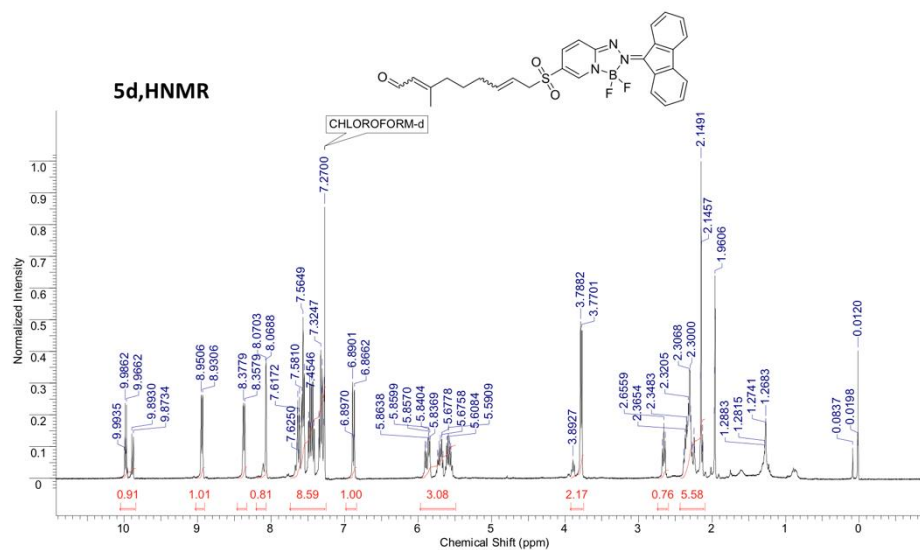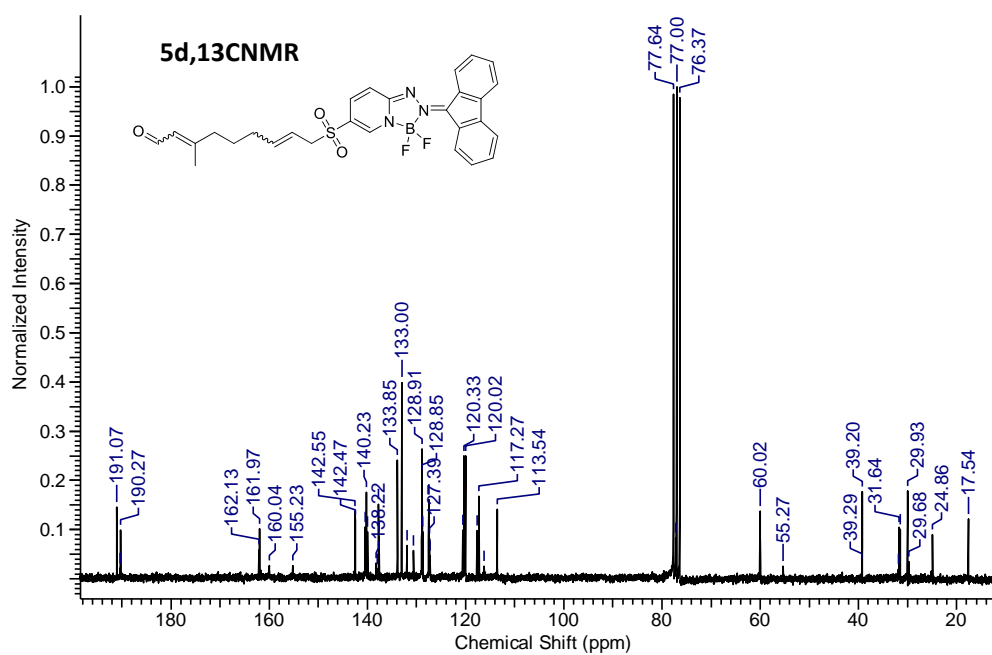

# SUPPORTING INFORMATION

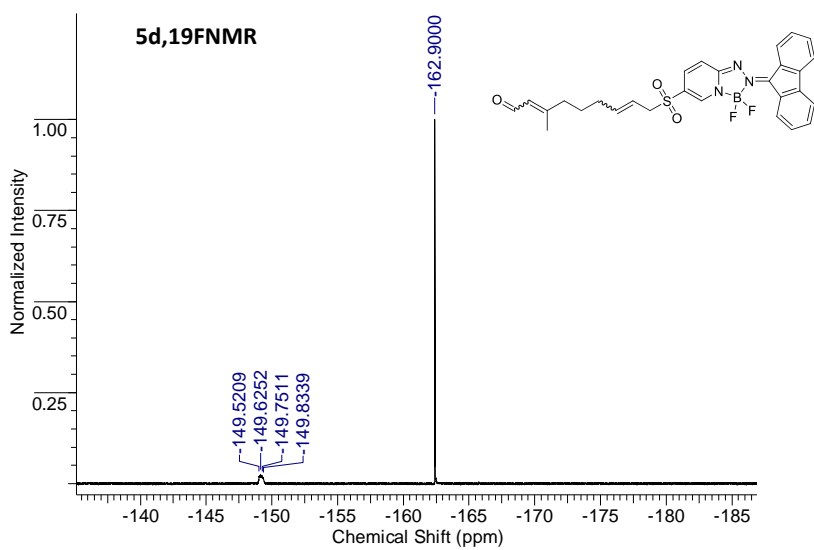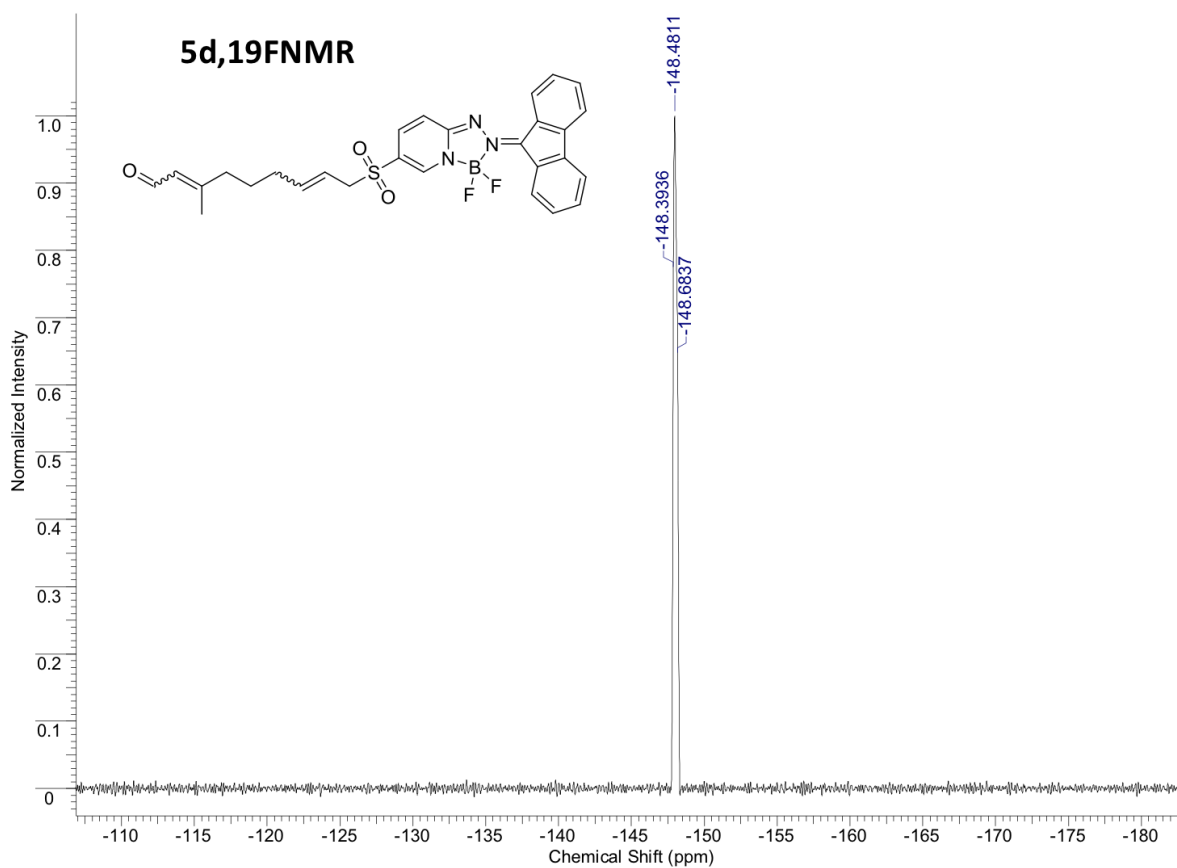



# SUPPORTING INFORMATION

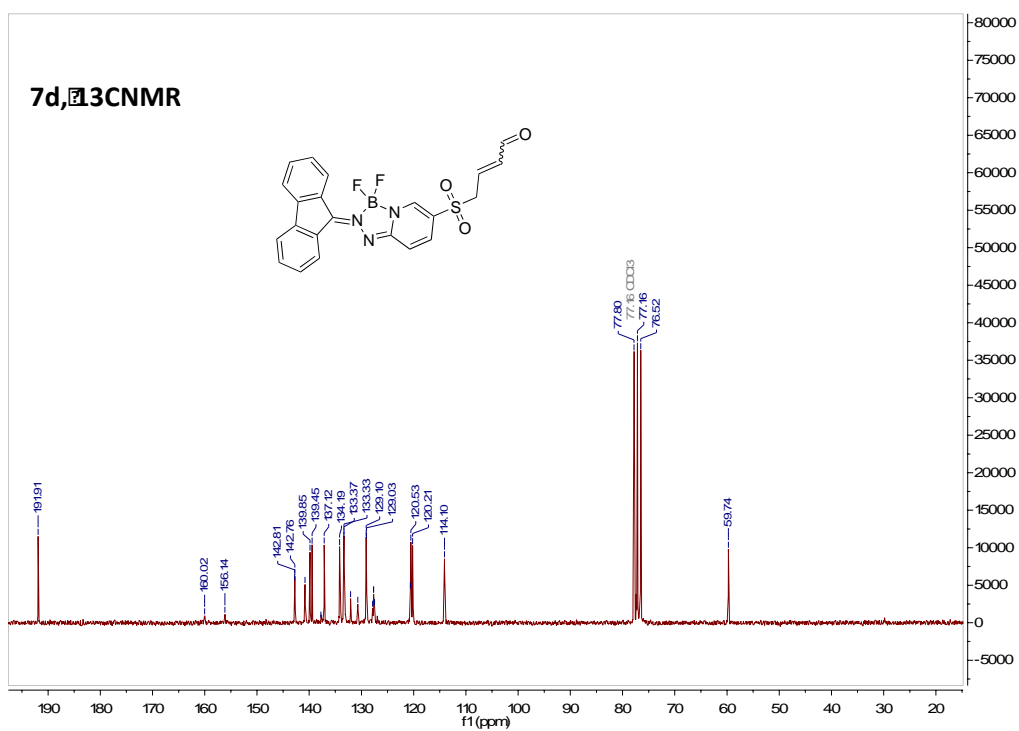



# SUPPORTING INFORMATION

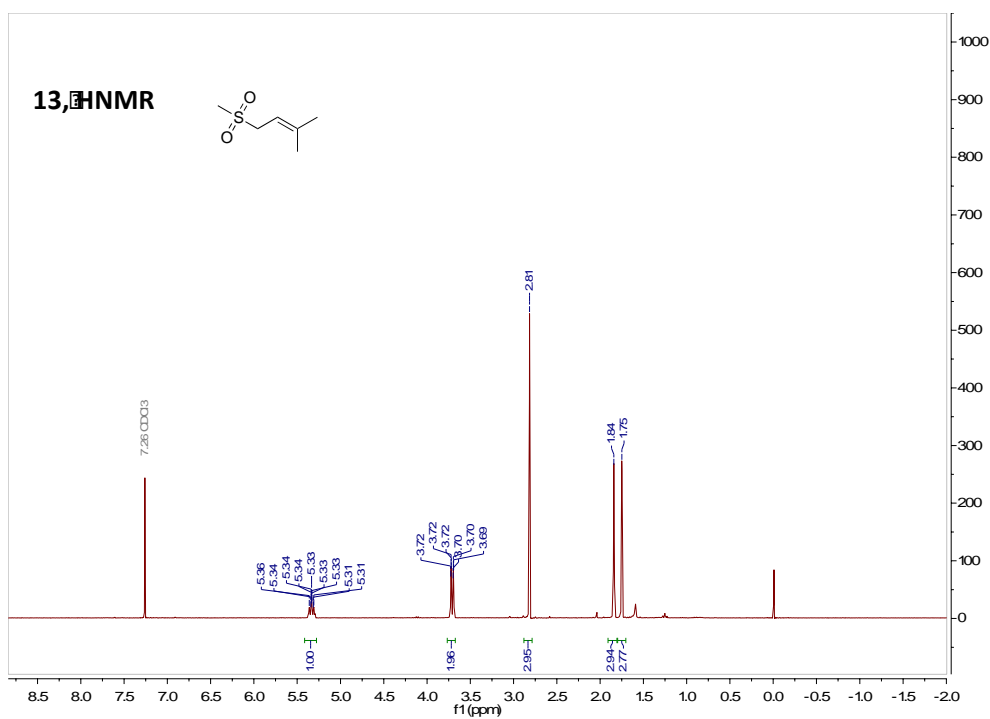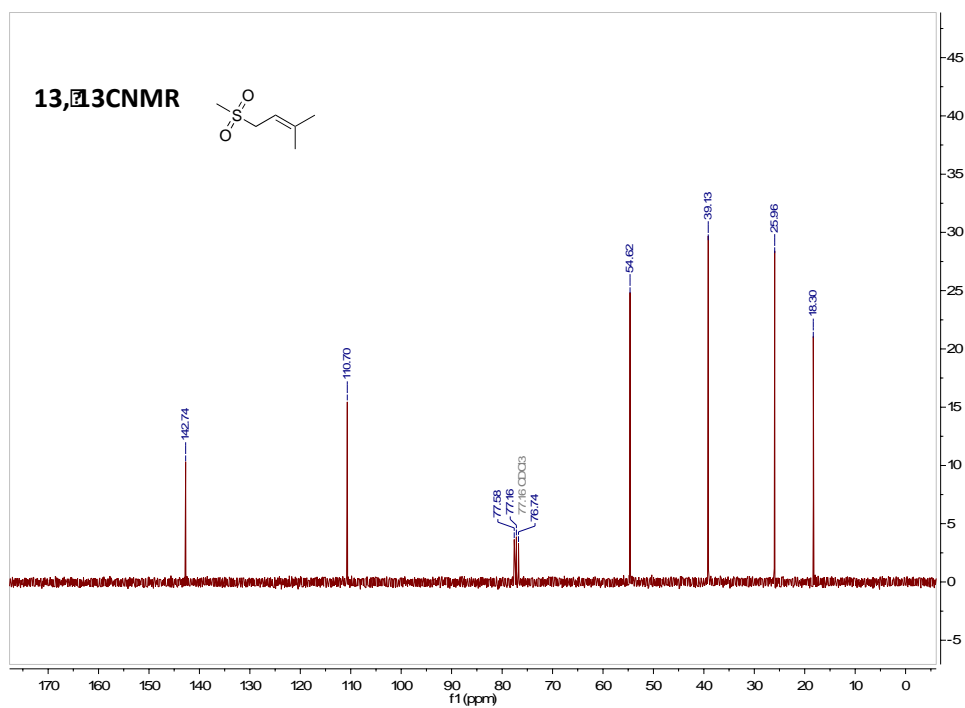

# SUPPORTING INFORMATION

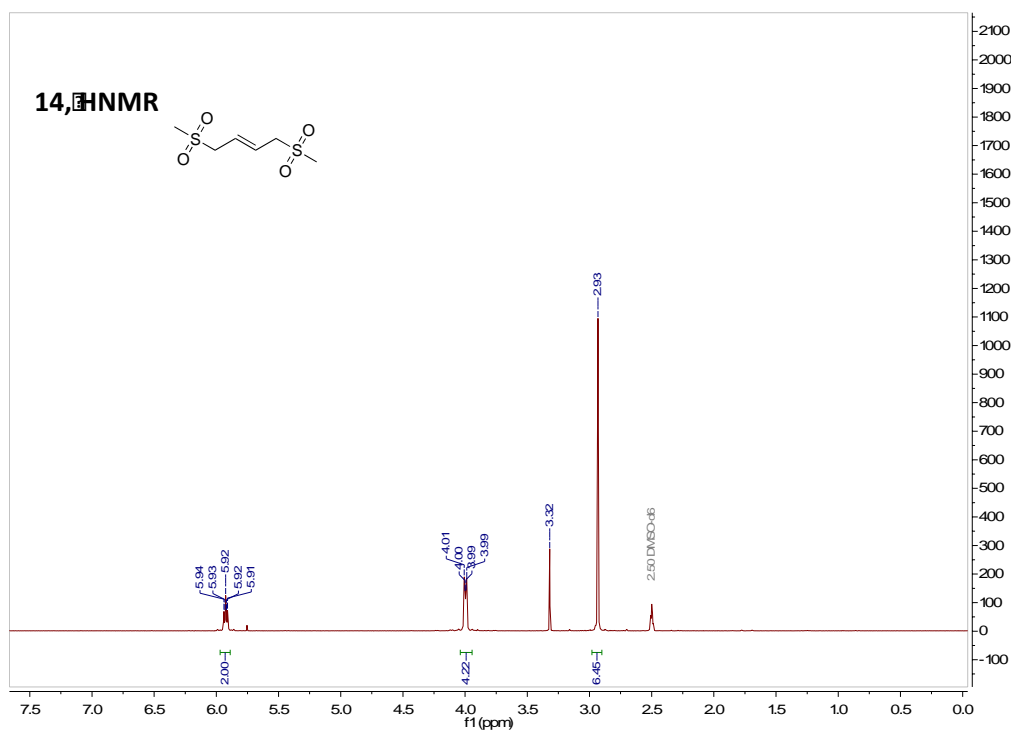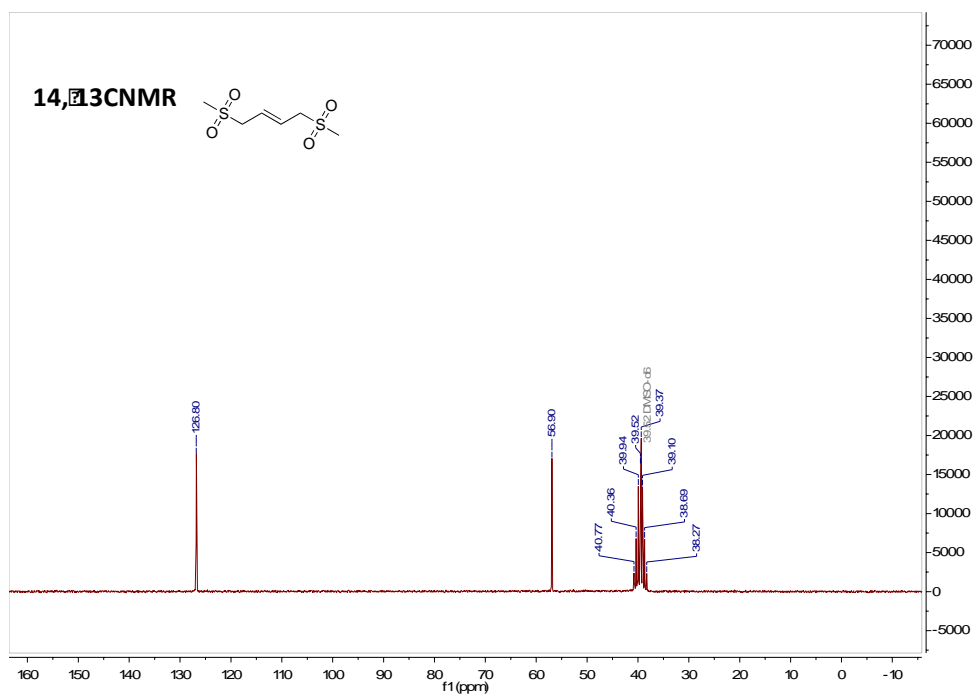

# SUPPORTING INFORMATION

**16, <sup>1</sup>H NMR**

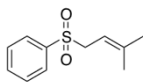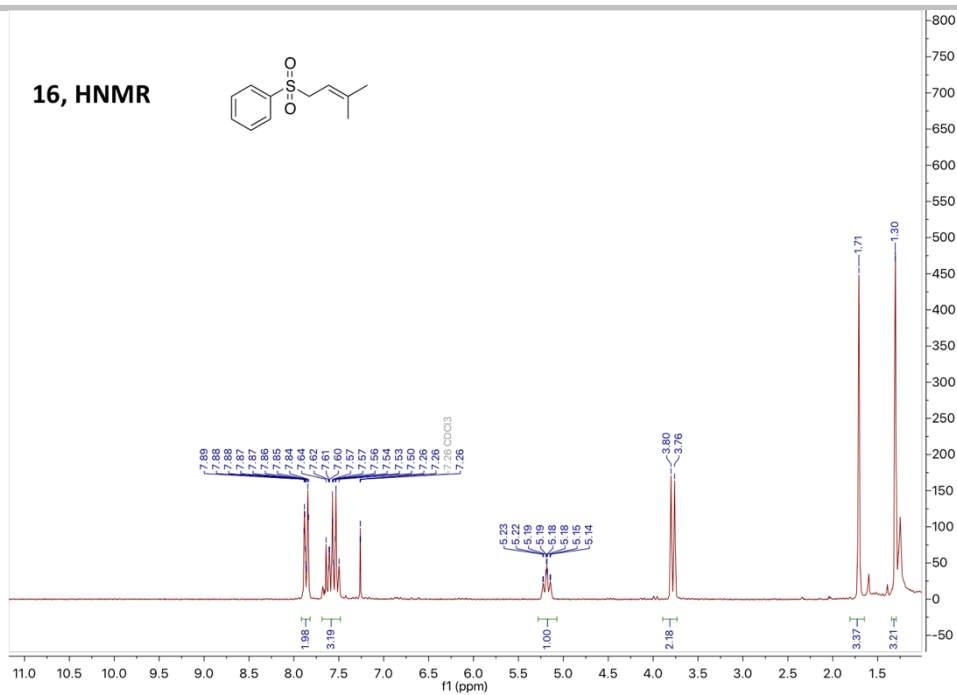

**16, <sup>13</sup>C NMR**

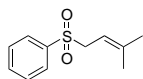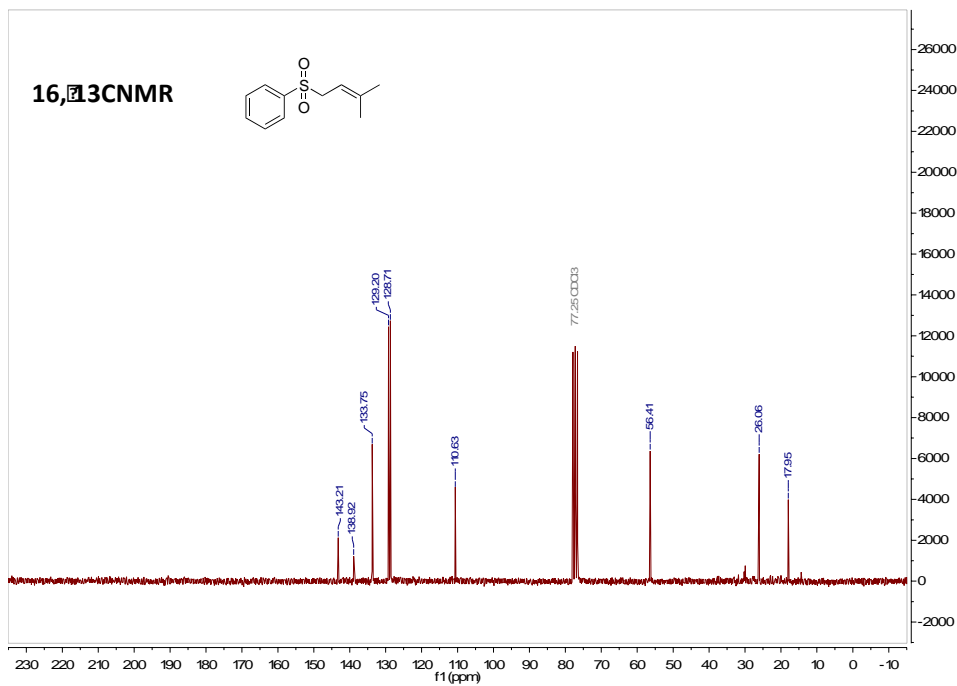

# SUPPORTING INFORMATION

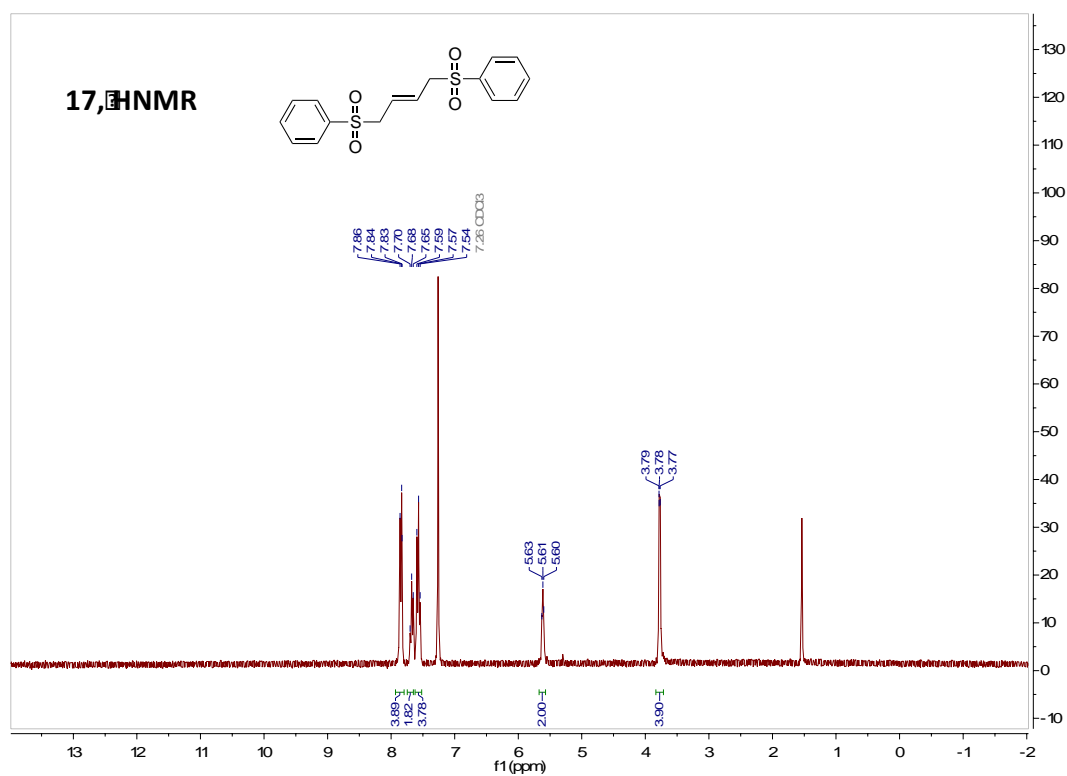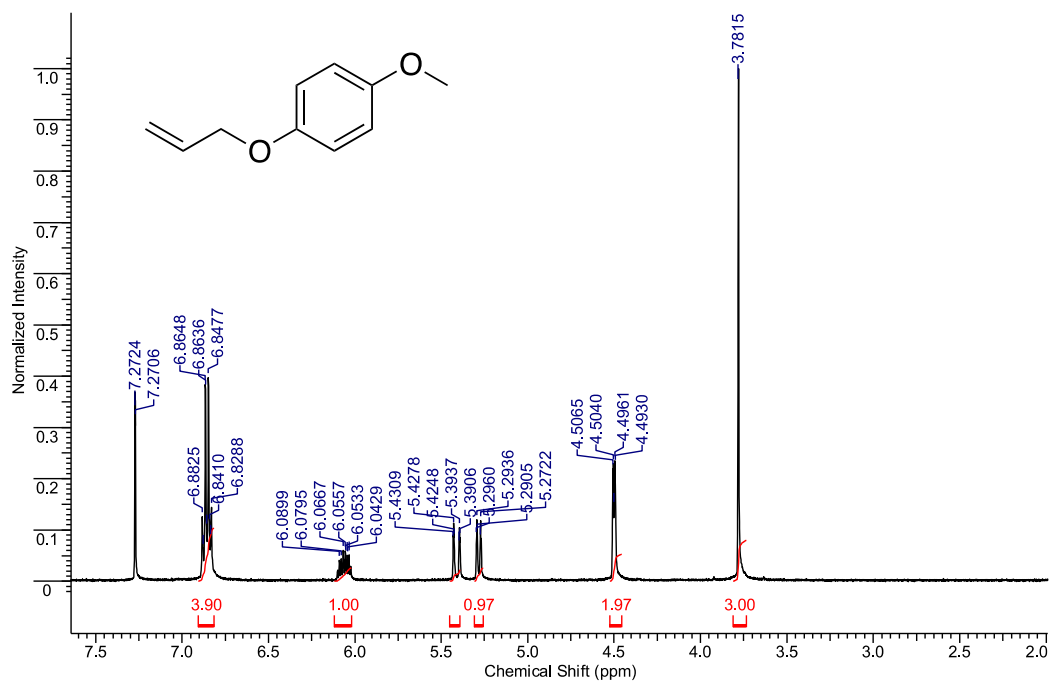

# SUPPORTING INFORMATION

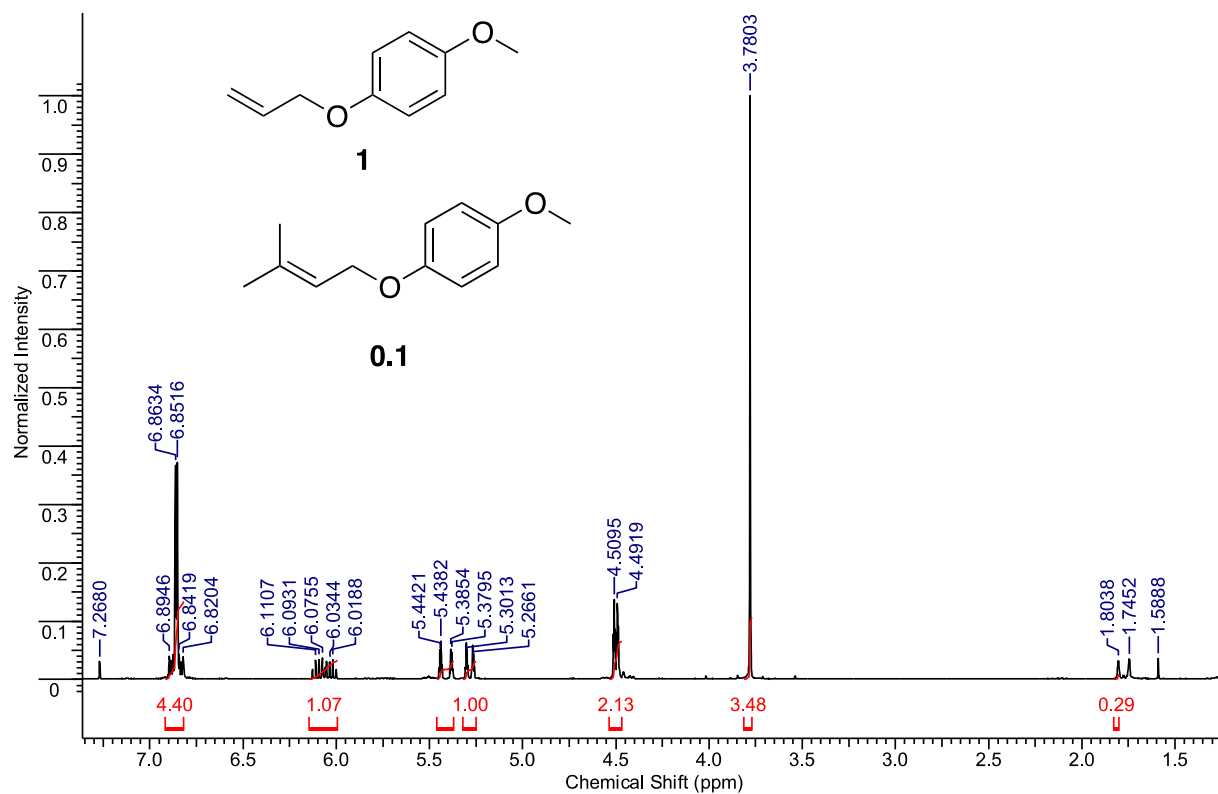

## References:

- [1] S. Hapuarachchige, G. Montano, C. Ramesh, D. Rodriguez, L. Henson, C. Williams, S. Kadavakkollu, D. Johnson, C. Shuster, J. Arterburn, *Journal of the American Chemical Society* **2011**, *133*, 6780-6790.
- [2] B. Tao, D. Boykin, *Journal of Organic Chemistry* **2004**, *69*, 4330-4335
- [3] T. Okauchi, K. Kuramoto, M. Kitamura, *Synlett* **2010**, 2891-2894
- [4] B. Trost, D. Curran, *Tetrahedron Letters* **1981**, *22*, 1287-1290.
- [5] Y. Masahiro, H. Mariko, S. Kozo, *Organic Letters* **2009**, *11*, 4752-4755.
- [6] S. Bernd, R. Martin, *Synthesis* **2016**, *48*, 1399-1406.
- [7] H. Blackwell, D. O'Leary, A. Chatterjee, R. Washenfelder, D. Bussmann, R. Grubbs, *Journal of the American Chemical Society* **2000**, *122*, 58-71.
- [8] Y. Zhao, D. Truhlar, *Journal of Chemical Physics* **2006**, *125*.
- [9] F. Weigend, R. Ahlrichs, *Physical Chemistry Chemical Physics* **2005**, *7*, 3297-3305.
- [10] D. Andrae, U. Haussermann, M. Dolg, H. Stoll, H. Preuss, *Theoretica Chimica Acta* **1990**, *77*, 123-141.
- [11] S. Miertus, E. Scrocco, J. Tomasi, *Chemical Physics* **1981**, *55*, 117-129; E. Cancès, B. Mennucci, J. Tomasi, *Journal of Chemical Physics* **1997**, *107*, 3032-3041; J. Tomasi, B. Mennucci, R. Cammi, *Chemical Reviews* **2005**, *105*, 2999-3093; R. Ribeiro, A. Marenich, C. Cramer, D. Truhlar, *Journal of Physical Chemistry B* **2011**, *115*, 14556-14562; M. Cossi, V. Barone, B. Mennucci, J. Tomasi, *Chemical Physics Letters* **1998**, *286*, 253-260.
- [12] R. Seeger, J. Pople, *Journal of Chemical Physics* **1977**, *66*, 3045-3050.
- [13] C. Riplinger, F. Neese, *Journal of Chemical Physics* **2013**, *138*.
- [14] F. Neese, *Wiley Interdisciplinary Reviews-Computational Molecular Science* **2012**, *2*, 73-78.
- [15] B. Mondal, F. Neese, S. Ye, *Inorganic Chemistry* **2015**, *54*, 7192-7198.
- [16] S. Ye, C. Riplinger, A. Hansen, C. Krebs, J. Bollinger, F. Neese, *Chemistry-a European Journal* **2012**, *18*, 6555-6567; G. Xue, C. Geng, S. Ye, A. Fiedler, F. Neese, L. Que, *Inorganic Chemistry* **2013**, *52*, 3976-3984; J. Song, E. Klein, F. Neese, S. Ye, *Inorganic Chemistry* **2014**, *53*, 7500-7507; S. Cao, X. Liu, Y. Yuan, Z. Zhang, J. Fang, S. Loo, J. Barber, T. Sum, C. Xue, *Physical Chemistry Chemical Physics* **2013**, *15*, 18363-18366.
- [17] S. Garber, J. Kingsbury, B. Gray, A. Hoveyda, *Journal of the American Chemical Society* **2000**, *122*, 8168-8179.
